# Supplementary material for: The Phylogeny of Osteopontin—Analysis of the Protein Sequence
Source: PubMed Central journal article supplement (PMC6164354; doi:10.3390/ijms19092557), 2018-08-28

## **SUPPLEMENT**

**Table S1: Alignments by taxa.** Retrieved sequences were grouped by taxonomic order and aligned with Clustal Omega. The canonical sequence is highlighted in yellow. Common variants are on green, turquoise or blue background. Rare deviations from the consensus sequence have no background color. The putative signal sequence is boxed. 1.1. Primates 1.2. Carnivora 1.3. Artiodactyla (Cervidae and Bovidae) 1.4. Artiodactyla (Camelidae, Suidae and Cetacea) 1.5. Perissodactyla 1.6. Afrotheria and Xenarthra 1.7. Marsupialia 1.8. Chiroptera 1.9. various Eutheria 1.10. Lagomorpha and similar orders 1.11. Rodentia 1.12. Reptilia (Crocodilia and Testudines) 1.13. Reptilia (Squamata) 1.14. Aves 1.15. Fish.





XM\_003790097.3:Otolemur garnettii  
NC\_033688.1:Microcebus murinus  
XM\_012647256.1:Propithecus coquereli  
NW\_007247132.1:Carlito syrichta  
XM\_002745608.4:Callithrix jacchus  
XM\_003923998.2:Saimiri boliviensis boliviensis  
XM\_012437737.1:Aotus nancymae  
NW\_016107492.1:Cebus capucinus  
NW\_012116577.1:Colobus angolensis palliatus  
NW\_019322877.1:Ptilocolobus tephrosceles  
XM\_010366156.1:Rhinopithecus roxellana  
XM\_017895924.1:Rhinopithecus bieti  
NW\_012104043.1:Mandrillus leucophaeus  
XM\_003898941.3:Papio anubis  
NC\_023648.1:Chlorocebus sabaeus  
XM\_012040129.1:Cercocebus atys  
NM\_001261806.2:Macaca mulatta  
XM\_011737736.1:Macaca nemestrina  
XM\_005555383.2:Macaca fascicularis  
XM\_012499285.1:Nomascus leucogenys  
CR859846.1:Pongo abelii  
NM\_001040058.1:Homo sapiens  
NC\_018428.2:Gorilla gorilla gorilla  
NC\_006471.4:Pan troglodytes  
XM\_008963650.1:Pan paniscus

-----DLSTE-----THSKPEPSDMIVSQEHSVSLVETSHE-----  
RETSQMDDPSVFAHSHQSRLLKRRKADASSNEHSDVIDSQEHS-----HSHEFLSQEDR  
HETSQMDDQSVETHSHSQSRLHKKRADDASNEHSDMIDSQERS-----HSREFHSQEDR  
HETSQDDQSAETHSHSQSRLYKRRASDESNEHSDMINSQETSKVSEIHSHEVHSHELD  
HEMSQLDDQSAETHSHSQSRLHKKRASDESNEHSDVIDSQEVSKVSRREFHSHEFHSCEDL  
HEMSQLDDQSAETHSHSEKSRLHKKRASDESNEHSEVVDSQEVSKVSRREFHSHEFHSCEDM  
HEMSQLDDQSAETHSHSQSRLHKKRASDESNEHSDVIDSQEVSKVSRREFHSHEFHSCEDM  
HEMSQLDDQSAETYSHSQSRLHKKRASDESNEHSDVDSQEVSKVSRREFHSHEFHSCEDM  
HETSQLDDHSAETHSHKQSRLYKRRASDDSNEHSDVIDSQERSKVSREFHSHEFHSHEDM  
HETSQLDDHSAETHSHKQSRLYKRRASDDSNEHSDVIDSQERSKVSREFHSHEFHSHEDM  
HETSQLDDHSAETHSHKQSRLYKRRASDDSNEHSDVIDSQERSKVSREFHSHEFHSHEDM  
HETSQLDDHSAETHSHKQSRLYKRRASDDSNEHSDVIDSQERSKVSREFHSHEFHSHEDM  
HETSQLDDHSAETHSHKHSRLYKRRASDDSNEHSDVIDSQERSKISREFHSHEFHSHEDM  
HEMSQLDDHSAETHSHKHSRLYKRRASDDSNEHSDVIDSQERSKISREFHSHEFHSHEDM  
HETSQLDDHSAETHSHKHSRLYKRRASDDSNEHSDVIDSQERSKISREFHSHEFHSHEDM  
HETSQLDDHSAETHSHKHSRLYKRRASDDSNEHSDVIDSQERSKISREFHSHEFHSHEDM  
HETSQLDDHSAETHSHKHSRLYKRRASDDSNEHSDVIDSQERSKISREFHSHEFHSHEDM  
HETSQLDDQSAETHSHKQSRLYKRRKQP-----QSHEFHSHEFHSHEDT  
HEMSQLDDQSAETHSHKKSRLYKRRASDESNEHSDVIDSQELSKVSRREFHSHEFHSHEDM  
YETSQLDDQSAETHSHKQSRLYKRRKANDESNEHSDVIDSQELSKVSRREFHSHEFHSHEDM  
YETSQLDDQSAETHSHKQSRLYKRRASDESNEHSDVIDSQELSKVSRREFHSHEFHSHEDM  
YETSQLDDQSAETHSHKQSRLYKRRASDESNEHSDVIDSKELSKVSRREFHSHEFHSCGDM  
YEMSQLDDQSAETHSHKQSRLYKRRASDESNEHSDVIDSKELSKVSRREFHSHEFHSCGDM

\* \* \*

\* : \*

XM\_003790097.3:Otolemur garnettii  
NC\_033688.1:Microcebus murinus  
XM\_012647256.1:Propithecus coquereli  
NW\_007247132.1:Carlito syrichta  
XM\_002745608.4:Callithrix jacchus  
XM\_003923998.2:Saimiri boliviensis boliviensis  
XM\_012437737.1:Aotus nancymae  
NW\_016107492.1:Cebus capucinus  
NW\_012116577.1:Colobus angolensis palliatus  
NW\_019322877.1:Ptilocolobus tephrosceles  
XM\_010366156.1:Rhinopithecus roxellana  
XM\_017895924.1:Rhinopithecus bieti  
NW\_012104043.1:Mandrillus leucophaeus  
XM\_003898941.3:Papio anubis  
NC\_023648.1:Chlorocebus sabaeus  
XM\_012040129.1:Cercocebus atys  
NM\_001261806.2:Macaca mulatta  
XM\_011737736.1:Macaca nemestrina  
XM\_005555383.2:Macaca fascicularis  
XM\_012499285.1:Nomascus leucogenys  
CR859846.1:Pongo abelii  
NM\_001040058.1:Homo sapiens  
NC\_018428.2:Gorilla gorilla gorilla  
NC\_006471.4:Pan troglodytes  
XM\_008963650.1:Pan paniscus

---DLESKEEDKLLKFRVSHELDSASSEVN  
LVDPDQE-----  
LVDPKSKKEEDKHLKFRISHELDSASSEVN  
LVLDPKSKEEDTHLKFRISHELDSASSEVN  
LVVDPKSTEEKHLKFRISHELDSASSEVN  
LVVDPKSKKEEDKHLKFRISHELDSASSEVN  
LVVDPKSKKEEDKHLKFRISHELDSASSEVN

: :

**Table S1.1: Osteopontin in Primates.** As alternative splicing of exons 4 or 5 has been shown to occur in humans, the respective splice junctions are marked by vertical lines. Of note, full-length sequences for *Otolemur garnettii* or *Pongo abelii* were not found; there is no experimental evidence that osteopontin is actually spliced in these animals. The available *Colobus angolensis palliatus* sequence likely reflects transcription or translation from an alternative start site.

XM\_003985184.5: *Felis catus*  
XM\_015073631.1: *Acinonyx jubatus*  
XM\_019464775.1: *Panthera pardus*  
XM\_007074695.2: *Panther tigris*  
XM\_003434024.4: *Canis lupus familiaris*  
XM\_004756106.2: *Mustela putorius furo*  
XM\_002913580.3: *Ailuropoda melanoleuca*  
XM\_008707124.1: *Ursus maritimus*  
NW\_019154087.1: *Enhydra lutris kenyonii*  
NW\_004450264.1: *Odobenus rosmarus divergens*  
XM\_021702336.1: *Neomonachus schauinslandi*  
NW\_006383049.1: *Leptonychotes weddellii*

```
MRIAVICFCLLGIAYAIPKQ TDSGSSEEKQLYNKYPVAVATWPKPDPSQKQTFLALQNA
MRIAVICFCLLGIAYTIPIKQ TDSGSSEEKQLYNKYPGAVATWPKPDPSQKQTFLALQNA
MRIAVICFCLLGIAYAIPKQ TDSGSSEEKQLYNKYPGAVATWPKPDPSQKQTFLALQNA
MRIAVICFCLLGIAYAIPKQ TDSGSSEEKQLYNKYPGAVATWPKPDPSQKQTFLALQNA
MRIAVICFCLLGIAYAIPKHADSGSSEEKQLYNKYPGAVATWLKPDPSQKQTFLALQNA
MKIAVICFCLLGIAYAIPKQADSGSSEEK-----QNT
MRIAVICFCLLGIAYAIPKQ PDSGSSEEKQLYHKYPGAVATWLKPDPSQKQTFLALQNT
MRIAVICFCLLGVAFAPKQ PDSGSSEEKQLYHKYPGAVATWLKPDPSQKQTFLALQNT
MKIAVICFCLLGIAYAIPKQADSGSSEEKQLYHKYPGAVATWLKPDPSQKQTFLALQNT
MRLAVICFCLLGIAYAIPKQADSGSSEEKQLYNKYPGAVATWLKPDPSQKQTFLALQNT
MRLAVICFCLLGIAYAIPKQADSGSSEEK-----QNT
MRLAVICFCLLGIAYAIPKQADSGSSEEKQLYNKYPGAVATWLKPDPSQKQTFLALQNT
*****:::*****:***** **:
```

XM\_003985184.5: *Felis catus*  
XM\_015073631.1: *Acinonyx jubatus*  
XM\_019464775.1: *Panthera pardus*  
XM\_007074695.2: *Panther tigris*  
XM\_003434024.4: *Canis lupus familiaris*  
XM\_004756106.2: *Mustela putorius furo*  
XM\_002913580.3: *Ailuropoda melanoleuca*  
XM\_008707124.1: *Ursus maritimus*  
NW\_019154087.1: *Enhydra lutris kenyonii*  
NW\_004450264.1: *Odobenus rosmarus divergens*  
XM\_021702336.1: *Neomonachus schauinslandi*  
NW\_006383049.1: *Leptonychotes weddellii*

```
VLSEETDDFKQKTLASKSNESHVDVDEDDDDVDSQDSVDSHDTDDDSNQSDSEDELVTD
VLSEETDDFKQKALASKSNESHVDVDEDDDDVDSQDSVDSHDTDDDSNQSDSEDELVTD
VLSEETDDFKQKTLASKSNESHVDVDEDDGDDVDSQDSVDSHDTDDDSNQSDSEDELVTD
VLSEETDDFKQKTLASKSNESHVDVDEDDGDDVDSQDSVDSHDTDDDSNQSDSEDELVTD
VLTEETDDFKQKTFSSKSNESHDDVDEDDGDDVDSQDSVDSNDLDDDSNESDESDELVTD
VLSQENDDFQKTLSSKSNESHEDVDDDDDDVDSQDSVDSDDVDDSKQSDSEDEVVTD
VLSQETDDFRQKTLSSKSNESHDDVDEDDDDVDSQDSVDSDDSDGDDSNQSDSEDELVTD
VLSQETDDFKQKTLSSKSNESHDDVDEDDGDDVDSQDSVDSNDVDDSNQSDSEDELVTD
VLSQENDDFQKTLSSKSNESHEDVDDDDDDVDSQDSVDSNDVDDSNQSDSEDEVVTD
VLSQENDDFQKTLSSKSNESHEDVDEDDGDDVDSQDSIDSNDVDDSNQSDSEDELVTD
VLSQENDNFQKTLSSKSNESHEDVDEDDGDDVDSQDSIDSNDVDDSNQSDSEDELVTD
VLSQENDNFQKTLSSKSNESHEDVDEDDGDDVDSQDSIDSNDVDDSNQSDSEDELVTD
**::* *:::****:****: ** ***** ** * **:::*****:***
```

XM\_003985184.5: *Felis catus*  
XM\_015073631.1: *Acinonyx jubatus*  
XM\_019464775.1: *Panthera pardus*  
XM\_007074695.2: *Panther tigris*  
XM\_003434024.4: *Canis lupus familiaris*  
XM\_004756106.2: *Mustela putorius furo*  
XM\_002913580.3: *Ailuropoda melanoleuca*  
XM\_008707124.1: *Ursus maritimus*  
NW\_019154087.1: *Enhydra lutris kenyonii*  
NW\_004450264.1: *Odobenus rosmarus divergens*  
XM\_021702336.1: *Neomonachus schauinslandi*  
NW\_006383049.1: *Leptonychotes weddellii*

```
FPTDV PATQFFTPAVPTRDSYDGRGDSVAYGLRSKSKKSHRYEDQYPDSTEEDFTSLVKS
FPTDV PATQFFTPAVPTRDSYDGRGDSVAYGLRSKSKKSHRYEDQYPDSTEEDFTSLVKS
FPTDV PATQFFTPAVPTRDSYDGRGDSVAYGLRSKSKKSHRYEDQYPDSTEEDFTSLVKS
FPTDV PATQFFTPAVPTRDSYDGRGDSVAYGLRSKSKKSHRYEDQYPDSTEEDFTSLVKS
FPTDI PATQLFTPAVPTRGSYDGRGDSVAYGLRSKSKKSHRYEDQYPDSTEEDFTSLVKS
FPTDI PATQFFTPSVPTRDSNDGRGDSVAHGLRSRSMKMSHTYEVQYPDSTEEDLTSLVKS
FPTDI PATQFFTPAVPTRDSNDGRGDSVAYGLRSRSMKMSHRYEVQYPDSTEEDLTSLVKS
FPTDI PATQFFTPAVPTRDSNDGRGDSVAHGLRSRSMKMSHTYEVQYPDSTEEDLTSLVKS
FPTDI PATQFFTPAVPTRDSNDGRGDSVAHGLRSRSMKMSHTYEVQYPDSTEEDLTSLVKS
FPTDI PATQFFTPAVPTRDSNDGRGDSVAHGLRSRSMKMSHTYEVQYPDSTEEDLTSLVKS
FPTDI PATQFFTPAVPTRDSNDGRGDSVAHGLRSRSMKMSHTYEVQYPDSTEEDLTSLVKS
FPTDI PATQFFTPAVPTRDSNDGRGDSVAHGLRSRSMKMSHTYEVQYPDSTEEDLTSLVKS
****.*****:*****:*****:*****:*****:*****:*****:*****
```

|                                                    |                                                                 |
|----------------------------------------------------|-----------------------------------------------------------------|
| XM_003985184.5: <i>Felis catus</i>                 | QSMEDDFNAVLLSHTVRRSPDRD-SHVKDSQETSQVDDHSMETKSRKHSKEYKLGASDEN    |
| XM_015073631.1: <i>Acinonyx jubatus</i>            | QSMEDDFNAVLLSHTVRRSPDRD-SHVKDSQETSQVDDHSMETKSRKHSKEYKLGASDEN    |
| XM_019464775.1: <i>Panthera pardus</i>             | QSTKDDFNAVLLSHTVRRSPDRD-SHVKDSQETSQVDDHSMETKSRKHSKEYKLGASDEN    |
| XM_007074695.2: <i>Panther tigris</i>              | QSTKDDFNAVLLSHTVRRSPDRD-SHVKDSQETSQVDDHSMETKSRKHSKEYKLGASDEN    |
| XM_003434024.4: <i>Canis lupus familiaris</i>      | ASMEDDFNAVLLSHTVRRSPDRD-SHAKDSQETSQVDDHSMETKGRKHSQEYKLGASDES    |
| XM_004756106.2: <i>Mustela putorius furo</i>       | ESTEDDFNAVLLSQTIVRGTSDDRD-SHARHSQETSQVDDHSMETKDRRHRTREYKLGASDES |
| XM_002913580.3: <i>Ailuropoda melanoleuca</i>      | GSTEDDFNAVLLSQTIVRGTSDDGD-SHAKDSQETSQVDDHSMETKSRRHRTREYKLGASDES |
| XM_008707124.1: <i>Ursus maritimus</i>             | GSMEDDFNAVLLSQTIVRGTSDDGD-SHAKDSQETSQVDDHSMETKSRRHRTREYKLGASDES |
| NW_019154087.1: <i>Enhydra lutris kenyonii</i>     | ESTEDDFNAVLLSQTIVRGTSDDGD-SHARYSQEASQVDDHSMETKSRRYRTREYKLGASDES |
| NW_004450264.1: <i>Odobenus rosmarus divergens</i> | ESTEDDFNAVLLSHTVRRGTSDGD-SHAKDSQETSQVDDHSMETKSHKHAREYKLGASDES   |
| XM_021702336.1: <i>Neomonachus schauinslandi</i>   | ESMEDDFNAVLLSQTIVRGTSDDGD-SHAKDSQETSQVDDHSMETKSHKHAREYKLGASDES  |
| NW_006383049.1: <i>Leptonychotes weddellii</i>     | ESMEDDFNAVLLSQTIVRGTSDDGD-SHAKDSQETSQVDDHSMETKSHKHAREYKLGASDES  |

\* : :\*\*\*\*\* \*\*\*:\*\* : \* \* \*\* . : \*\*\*:\*\* \*\*\*\*\* . : : :\*\*\*\*\*:\*\*\*\*\*.

|                                                    |                                                               |
|----------------------------------------------------|---------------------------------------------------------------|
| XM_003985184.5: <i>Felis catus</i>                 | NKHSHEIGSQEESDISSELVGGTIVQSNKEKLVQHPESFEQDKHLKFRVSHELDSASSEVN |
| XM_015073631.1: <i>Acinonyx jubatus</i>            | NKHSHEIGSQEESDVSELVGGTIVQSNKEKLVQHPESFEQDKHLKFRVSHELDSASSEVN  |
| XM_019464775.1: <i>Panthera pardus</i>             | NKHSHEIGSQEESDVSELVGGTIVQSNKEKLVQHPESFEQDKHLKFRVSHELDSASSEVN  |
| XM_007074695.2: <i>Panther tigris</i>              | NKHSHEIGSQEESDVSELVGGTIVQSNKEKLVQHPESFEQDKHLKFRVSHELDSASSEVN  |
| XM_003434024.4: <i>Canis lupus familiaris</i>      | NMHSHEIGSQENSEVSELVSQLSQSHEKELIVDSKSEEDKHLKFRVSHELDSASSEIN    |
| XM_004756106.2: <i>Mustela putorius furo</i>       | SKHSQEIGSQENSEVSELVSIYIVQSHENEQVLDGSGVVEEDKHLKFRVSHELDNASTEVN |
| XM_002913580.3: <i>Ailuropoda melanoleuca</i>      | DRHSHEIDSQENSEVSELVSIYIVQSHENEQVLDGSGVVEEDKHLKFRVSHELDNASTEVN |
| XM_008707124.1: <i>Ursus maritimus</i>             | DRHSHEIDSQENSEVSELVSIYIVQSHENEQVLDGSGVVEEDKHLKFRVSHELDNASTEVN |
| NW_019154087.1: <i>Enhydra lutris kenyonii</i>     | SKHSHEIGSQENSEVSELVSIYIVQSHENEQVLDGSGVVEEDKHLKFRVSHELDSASTEVN |
| NW_004450264.1: <i>Odobenus rosmarus divergens</i> | NKHSHEIGSQENSEVSELVSIYIVQSHENEQVLDGSGVVEEDKHLKFRVSHELDSASSEVN |
| XM_021702336.1: <i>Neomonachus schauinslandi</i>   | NKHSHEIGSQENSEVSELVSIYIVQSHENEQVLDGSGVVEEDKHLKFRVSHELDSASSEVN |
| NW_006383049.1: <i>Leptonychotes weddellii</i>     | NKHSHEIGSQENSEVSELVSIYIVQSHENEQVLDGSGVVEEDKHLKFRVSHELDSASSEVN |

. \*\*:\*\*.\*\*\*.\*\*\*.\*\*\*.\*\*\*.\*\*\* \*\* \* : . \* :\*\*\*\*\*: \*\*\*\*\*.\*\*\* \*\* \*

**Table S1.2: Osteopontin in Carnivora:** As alternative splicing of exons 4 or 5 has only been shown to occur in humans, the sequences for *Mustela putorius furo* and *Neomonachus schauinslandi* are likely not accurate reflections of the full transcripts.





|                                                       |                                                                   |
|-------------------------------------------------------|-------------------------------------------------------------------|
| HQ161904.1: <i>Cervus nippon</i>                      | EDFTSHVSESEEMHDAPKKTSQLNDHDKETNSNELSKELKPKAKDESSKHSVDVIESQENSK    |
| MKHE01000017.1: <i>Cervus elaphus hippelaphus</i>     | EDFTSHVSESEEMHDAPKKTSQLNDHDKETNSNELSKELKPKAKDESSKHSVDVIESQENSK    |
| XM_020876412.1: <i>Odocoileus virginianus texanus</i> | EDFSSHVSESEEMHDAPKKTSQLNDHDKETNSNELSKELKPKAKDESNKHSVDVIESQENSK    |
| S45840.1: <i>Bos taurus</i>                           | EDFTSHIESEERCM-STKKTSLRDLTDHDKETNRCLELSKELMPKAKDK-NKHSNLIIESQENSK |
| DQ295062.1: <i>Bubalus bubalis</i>                    | EDFTSHIESEEMHDAPKKTSQLTDHDKETNSRELKELTPKAKDKNNKHSNLIIESQENSK      |
| M66236.1: <i>Bos</i>                                  | EDFTSHIESEEMHDAPKKTSQLTDHDKETNSNELSKELTPKAKDK-NKHSNLIIESQENSK     |
| XM_010860191.1: <i>Bison bison bison</i>              | EDFTSHIESEEMHDAPKKTSQLTDHDKETNSNELSKELTPKAKDK-NKHSNLIIESQENSK     |
| JH881339.1: <i>Bos grunniens</i>                      | EDFTSHIESEEMHDAPKKTSQLTDHDKETNSNELSKELTPKAKDK-NKHSNLIIESQENSK     |
| NW_005393912.1: <i>Bos mutus</i>                      | EDFTSHIESEEMHDAPKKTSQLTDHDKETNSNELSKELTPKAKDK-NKHSNLIIESQENSK     |
| KU985440.1: <i>Bos indicus</i>                        | EDFTSHIESEEMHDAPKKTSQLTDHDKETNSNELSKELTPKAKDK-NKHSNLIIESQENSK     |
| XM_005972457.1: <i>Pantholops hodgsonii</i>           | EDFTSHIESEEMHDAPKKTSQLTDHSEETNSNELSKELMPKAKDE-SKHSNLIIESQENSK     |
| AF152416.1: <i>Ovis aries</i>                         | EDFTSHIESEEMHDAPKKTSQLTDHSEETNSDELKELTPKAKET-SKHSNRRIESQENSK      |
| KJ789112.1: <i>Capra hircus</i>                       | EDFTSHIESEEMHDAPKKTSQLTDHSEETNSDELKELTPKAKET-SKHSNRRIESQENSK      |
|                                                       | ***:***:***. : *****: * *****:*** ** *** ***:***: . ***: *****    |

|                                                       |                                            |
|-------------------------------------------------------|--------------------------------------------|
| HQ161904.1: <i>Cervus nippon</i>                      | VSQEFHSLSEKLDLDHKSE-EDKHLKIRISHELDSTISSEVN |
| MKHE01000017.1: <i>Cervus elaphus hippelaphus</i>     | VSQEFHSLSEKLDLDHKSE-EDKHLKIRISHELDSTISSE-- |
| XM_020876412.1: <i>Odocoileus virginianus texanus</i> | VSQEFHSLSEKLDLDHRSEEDKHLKIRISHELDSTISSEVN  |
| S45840.1: <i>Bos taurus</i>                           | LSQEFHSLSEKLDLDHKSE-EDKHLKIRISHELDSSASSEVN |
| DQ295062.1: <i>Bubalus bubalis</i>                    | LSQEFHSLSEKLDLDHKSE-EDKHLKIRISHELDSSASSEVN |
| M66236.1: <i>Bos</i>                                  | LSQEFHSLSEKLDLDHKSE-EDKHLKIRISHELDSSASSEVN |
| XM_010860191.1: <i>Bison bison bison</i>              | LSQEFHSLSEKLDLDHKSE-EDKHLKIRISHELDSSASSEVN |
| JH881339.1: <i>Bos grunniens</i>                      | LSQEFHSLSEKLDLDHKSE-EDKHLKIRISHELDSSASSEVN |
| NW_005393912.1: <i>Bos mutus</i>                      | LSQEFHSLSEKLDLDHKSE-EDKHLKIRISHELDSSASSEVN |
| KU985440.1: <i>Bos indicus</i>                        | LSQEFHSLSEKLDLDHKSE-EDKHLKIRISHELDSSASSE-N |
| XM_005972457.1: <i>Pantholops hodgsonii</i>           | LSQEFHSLSEKLDLDHKSE-EDKHLKIRISHELDSSASSEVN |
| AF152416.1: <i>Ovis aries</i>                         | LSQEFHSLSEKLDLDHKSE-EDKRLKIRISHELDSSASSEVN |
| KJ789112.1: <i>Capra hircus</i>                       | LSQEFHSLSEKLDLDHKSE-EDKRLKIRISHELDSSASSEVN |
|                                                       | :*****:*****:*** **:*****:***              |

**Table S1.3: Osteopontin in Artiodactyla, Cervidae and Bovidae.** The N-terminus of the sequence for *Odocoileus virginianus texanus* is possibly incomplete. The available *Cervus elaphus hippelaphus* sequence may reflect transcription or translation from an alternative start site.

XM\_006198167.2:Vicugna pacos -----  
XM\_010966141.1:Camelus bactrianus -----  
XM\_006175474.2:Camelus ferus -----  
XM\_010983105.1:Camelus dromedaries -----  
NM\_214023.1:Sus scrofa -----  
X16575.1:Sus -----  
XM\_007102526.1:Physeter catodon -----  
NW\_006776832.1:Lipotes vexillifer -----  
XM\_022582289.1:Delphinapterus leucas MTHLSTPCVGGERLEQPLNSETSWSLSTAGRGRAQSAALSTASAPPGTGLFLAAADQGTLI  
NW\_004438431.1:Orcinus orca -----  
XM\_004315204.2:Tursiops truncatus -----

XM\_006198167.2:Vicugna pacos -MKLAVICFCLLGIASALPVGQTN SGSSEEKQLN NKYPDAVATWLKPDPSQKQTF FLAPQS  
XM\_010966141.1:Camelus bactrianus -MKLAVICFCLLGIASALPVGQTN SGSSEEKQLN NKYPDAVATWLKPDPSQKQTF FLAPQS  
XM\_006175474.2:Camelus ferus -MKLAVICFCLLGIASALPVGQTN SGSSEEKQLN NKYPDAVATWLKPDPSQKQTF FLAPQS  
XM\_010983105.1:Camelus dromedaries -MKLAVICFCLLGIASALPVGQTN SGSSEEKQLN NKYPDAVATWLKPDPSQKQTF FLAPQS  
NM\_214023.1:Sus scrofa -MRIAVIAFCLWGFASALPVKQTN SGSSEEKLLS NKYTDAVATLLKPDPSQKQTF FLAPQN  
X16575.1:Sus -MRIAVIAFCLWGFASALPVKQTN SGSSEEKLLS NKYTDAVATLLKPDPSQKQTF FLAPQN  
XM\_007102526.1:Physeter catodon -MRIAVICLCLLGIASALPVKQTD SGSSEEKQLY NKYPDAIATWLKPDPSQKQTF FLAPQN  
NW\_006776832.1:Lipotes vexillifer -MRTAVICFCLLGI V SALPVKQTD SGSSEEKQLY NKYPDAIATWLKPDPSQKQTF LE PQN  
XM\_022582289.1:Delphinapterus leucas TMRIAVICFCLLGI TSALPVKQTD SGSSEEKQLY NKYPDAVATWLKPDPSQKQTF LE PQN  
NW\_004438431.1:Orcinus orca -MRIAVICFCLLGI SSALPVKQTD SGSSEEKQLY NKYPDAVATWLKPDPSQKQTF LE PQN  
XM\_004315204.2:Tursiops truncatus -MRIAVICFCLLGIASALPVKQTD SGSSEEKQLY NKYPDAVATWLKPDPSQKQTF LE PQN  
\* : \*\*\* : \*\* \* : \*\*\*\*\* \*\* : \*\*\*\*\* \* \*\*\* \*\* : \* \* \*\*\*\*\* : \*\*\* \*\* .

XM\_006198167.2:Vicugna pacos TASSEETDNFKQETLPSTSNESPDLTD DVDDDDDDTVDSQDV SNDSDDHTDDTDRSDES  
XM\_010966141.1:Camelus bactrianus TASSEETDNFKQETLPSTSNESP DHTDDVDDDDDDTVDSQDV SNDSDDHTDDTDRSDES  
XM\_006175474.2:Camelus ferus TASSEETDNFKQETLPSTSNESP DHTDDVDDDDDDTVDSQDV SNDSDDHTDDTDRSDES  
XM\_010983105.1:Camelus dromedaries TASSEETDNFKQETLPSTSNESP DHTDDVDDDDDDTVDSQDV SNDSDDHTDDTDRSDES  
NM\_214023.1:Sus scrofa TTSSSEETDDFKQETLP SKSNESPEQTDDVDDDDDEDHVDSRDTDSEEADHADDADR SDES  
X16575.1:Sus TTSSSEETDDFKQETLP SKSNESPEQTDDVDDDDDEDHVDSRDTDSEEADHADDADR SDES  
XM\_007102526.1:Physeter catodon TVSSEETADNKQETLP RKSSSEPEHTD TVDDEEDGDGQDADA ----N---DDHSDSDES  
NW\_006776832.1:Lipotes vexillifer TVSSEET-DNKQETLP SKSNESPEHTD TVDDEEDGDSQDTDA ----NDSKDADHSDES  
XM\_022582289.1:Delphinapterus leucas TVSSEET-DNKQETL SSKSNESPEHTD TVDDEEDGDSQDTDA ----NDSNDTDHSDES  
NW\_004438431.1:Orcinus orca TVSSEET-VNKQETLP SKSNESPEHTD TVDDEEDGDSQDND ----SNDTDHSDES  
XM\_004315204.2:Tursiops truncatus TVSSEET-DNKQETLP SKSNESPEHTD TVDDEEDGDSQDTDA ----SDS SDDTDHSDES  
\* \*\*\*\*\* . \* : \*\*\* : \*\* \*\*\*\*\* : \* \* : \*\*\*\*\*

XM\_006198167.2:Vicugna pacos  
XM\_010966141.1:Camelus bactrianus  
XM\_006175474.2:Camelus ferus  
XM\_010983105.1:Camelus dromedaries  
NM\_214023.1:Sus scrofa  
X16575.1:Sus  
XM\_007102526.1:Physeter catodon  
NW\_006776832.1:Lipotes vexillifer  
XM\_022582289.1:Delphinapterus leucas  
NW\_004438431.1:Orcinus orca  
XM\_004315204.2:Tursiops truncatus

```
HHSDESDEVVTDFFPTDIPATAVFTPAVPTEDTQDGRGDNIGYALRTKSKKFRRSEVEHPE  
HHSDESDEVVTDFFPTDIPATAVFTPAVPTEDTQDGRGDNIGYALRTKSKKFRRSEIEHPE  
HHSDESDEVVTDFFPTDIPATAVFTPAVPTEDTQDGRGDNIGYALRTKSKKFRRSEIEHPE  
HHSDESDEVVTDFFPTDIPATAVFTPAVPTEDTQDGRGDNIGYALRTKSKKFRRSEIEHPE  
HHSDESDELVTDFFPTDIPATDV-TPAVPTGDPNDGRGDSVVYGLRSKSKKFRRSEAAQLD  
HHSDESDELVTDFFPTDIPATDV-TPAVPTGDPNDGRGDSVVYGLRSKSKKFRRSEAAQLD  
HDSDESDEGVTDFFPTDVPATSVFTPPVPTGDTYGRGDSVAYGLRSKSKKFRRSEVQYPD  
HHSDESDEVVTDFFPTDVPATSVFTPPVPTGDTYGRGDSVAYGLRSK-KMFRRSEVQYPD  
HHSDESDEVVTDFFPTDVPATSVFTPPVPTGDTYGRGDSVAYGLRSK-KMFRRSEVQYPD  
HHSDESDEVVTDFFPTDVPATSVFTPPVPTGDTYGRGDSVAYGLRSK-KMFRRSEVQYPD  
HHSDESDEVVTDFFPTDVPATSVFTPPVPTGDTYGRGDSVAYGLRSK-KMFRRSEVQYPD  
HHSDESDEVVTDFFPTDVPATYVFTPPVPTGDTYGRGDSVAYGLRSK-KMFRRSEVQYPD  
*.***** ***** ** : ** *** * :****.:*.*** * ** **: : :
```

XM\_006198167.2:Vicugna pacos  
XM\_010966141.1:Camelus bactrianus  
XM\_006175474.2:Camelus ferus  
XM\_010983105.1:Camelus dromedaries  
NM\_214023.1:Sus scrofa  
X16575.1:Sus  
XM\_007102526.1:Physeter catodon  
NW\_006776832.1:Lipotes vexillifer  
XM\_022582289.1:Delphinapterus leucas  
NW\_004438431.1:Orcinus orca  
XM\_004315204.2:Tursiops truncatus

```
A-----MTHVESEEAEAHKAIFDAQGLHTASDWNSQWKDSQETSQPGDHSVETHSQEHS  
A-----MTHVESEEAEAHKAIFDAQGLHMASDWNSQWKDSQETSQPSDHSVETHSQEHS  
A-----MTHVESEEAEAHKAIFDAQGLHMASDWNSQWKDSQETSQPSDHSVETHSQEHS  
A-----MTHVESEEAEAHKAIFDAQGLHTASDWNSQWKDSQETSQPSDHSVETHSQEHS  
ATEEDLTSHVSEETDGTTPKAILVAQRLHVASDLDSQEKDSQETSQPDDRSVETRSQEQS  
ATEEDLTSHVSEETDGTTPKAILVAQRLHVASDLDSQEKDSQETSQPDDRSVETRSQEQS  
AREEDISSHLESEEVGDAPKAILVAQRLHRASDWNSRGKDSQETSQPEERMETHSREHS  
ATEEDVTSHVSEEEVGDAPKAILVAQRLHRASDWNSHGKDSQETSQPDDRSMETHSHEHS  
ATEEDVTSHVSEEEVGDAPKAILVAQRLHRASDWNSRGKDSQETSQPDDRSMETHSHEHS  
ATEEDVTSHVSEEEVGDAPKAILVAQRLHRASDWNSRGKDSQETSQPDDRSMETHSREHS  
ATEEDVTSHVSEEEVGDAPKAILVAQRLHRASDWNSRGKDSQETSQPDDRSMETHSREHS  
* :*****.:***: ** ** ** *: :*****.: : ** **: *
```

XM\_006198167.2:Vicugna pacos  
XM\_010966141.1:Camelus bactrianus  
XM\_006175474.2:Camelus ferus  
XM\_010983105.1:Camelus dromedaries  
NM\_214023.1:Sus scrofa  
X16575.1:Sus  
XM\_007102526.1:Physeter catodon  
NW\_006776832.1:Lipotes vexillifer  
XM\_022582289.1:Delphinapterus leucas  
NW\_004438431.1:Orcinus orca  
XM\_004315204.2:Tursiops truncatus

```
EEYKLLKADDEGRHSDVVIDSQENSQVSPPEIHSQELPshedklvLDPKSEEDTHLKFrvs  
EEYKLLKADDEGRHSDVIDSQENSQVSPPEVHSQELPshedklvLNPkSEEDTHLKFrvs  
EEYKLLKADDEGRHSDVVIDSQENSQVSPPEVHSQELPshedklvLNPkSEEDTHLKFrvs  
EEYKLLKADDEGRHSDVIDSQENSQVSPPEVHSQELPshedklvLNPkSEEDTHLKFrvs  
KEYTIKTYDGSNEHSNVIESQENPKVSEQE----FHshedklvPDSKSE-EDKHLKlrvs  
KEYTIKTYDGSNEHSNVIESQENPKVSEQE----FHshedklvPDSKSE-EDKHLKlrvs  
KEFKLKAEEVSENERSDVTDSDNSKVSQE----FHshedkVVPDLKSE-EDKHLKlrvs  
KEFKLKAEDDSKEHSDVIESQDNKVSQ----EFHSREDKLVpDLKSE-EDKHLKlrvs  
KEFKLKEDDSDNEHSNVIESQDNKVSHEFHSHQEFHSREDKLVpDLKSE-EDKHLKlrvs  
KEFKLKAEDDSVEHSDVIESQDNKVSHEFHSHQEFHSREDKLVpDLKSE-EDKHLKlrvs  
KEFKLKAEDDSVEHSDVIESQDNKVSHEFHSHQEFHSREDKLVpDLKSE-EDKHLKlrvs  
*: :* . . :*: :*: :* : : ***** : * ** ** ** :*** :***
```

|                                              |             |
|----------------------------------------------|-------------|
| XM_006198167.2: <i>Vicugna pacos</i>         | HELDSASSEVN |
| XM_010966141.1: <i>Camelus bactrianus</i>    | HELDSASSEVN |
| XM_006175474.2: <i>Camelus ferus</i>         | HELDSASSEVN |
| XM_010983105.1: <i>Camelus dromedaries</i>   | HELDSASSEVN |
| NM_214023.1: <i>Sus scrofa</i>               | HELESASSEIN |
| X16575.1: <i>Sus</i>                         | HELESASSEIN |
| XM_007102526.1: <i>Physeter catodon</i>      | HELDDASSEVN |
| NW_006776832.1: <i>Lipotes vexillifer</i>    | HELDSASSEVN |
| XM_022582289.1: <i>Delphinapterus leucas</i> | HESDASSEVN  |
| NW_004438431.1: <i>Orcinus orca</i>          | HELDSASSEVN |
| XM_004315204.2: <i>Tursiops truncatus</i>    | HELDSASSEVN |

\*\* :.\*\*\*\*\*:

**Table S1.4: Osteopontin in Artiodactyla (Camelidae, Suidae and Celaceae).**

XM\_014787875.1:*Ceratotherium simum simum*  
XM\_001496152.4:*Equus caballus*  
XM\_008523685.1:*Equus przewalskii*  
XM\_014842441.1:*Equus asinus*

MRIAVICLLGLIAYALPVQANSGSSEEKLLYNKSPDAVGTWLKPDPSQKQTL LAPQTV  
MRIAVICLLGLIAYALPVNQADSGSSEEKQLYNKHSDAVSIWLKPDPSQKQNL LAPQTV  
MRIAVICLLGLIAYALPVNQADSGSSEEKQLYNKHSDAVSIWLKPDPSQKQNL LAPQTV  
MRIAVICLLGLIAYALPVNQADSGSSEEKQLYNKHSDAVSIWLKPDPSQKQNL LAPQTV  
\*\*\*\*\*:\*\*\*\*\*:\*\*\*\*\* \*\*\*\*\* \*\* . \*\*\*\*\*:\*\*\*\*\*:\*\*\*\*\*

XM\_014787875.1:*Ceratotherium simum simum*  
XM\_001496152.4:*Equus caballus*  
XM\_008523685.1:*Equus przewalskii*  
XM\_014842441.1:*Equus asinus*

SSEETDLDKQETLPSKSNESPDHTDDVDDDDGDHVDSDQSDIDSDDSDETDPTDDPDQSE  
SSEETDNLKQETLPSQSNESHDTDDVDDDDVDGHEDDQSDIDSDDSDETDPTDDPDNSD  
SSEETDNLKQETLPSQSNESHDTDDVDDDDVDGHEDDQSDIDSDDSDETDPTDDPDNSD  
SSEETDNLKQETLPSQSNESHDTDDVDDNDGDHEDDQSDISNDSDETPTDDPDNSD  
\*\*\*\*\*:\*\*\*\*\*:\*\*\*\*\* \*\*\*\*\*:\*\*\*\*\*:\*\*\*\*\* \*\*\*\*\*:\*\*\*\*\*:\*\*\*\*\*

XM\_014787875.1:*Ceratotherium simum simum*  
XM\_001496152.4:*Equus caballus*  
XM\_008523685.1:*Equus przewalskii*  
XM\_014842441.1:*Equus asinus*

ESHHSDESELVTFPTDLPATPVFTPAVPTS DTYDGRGDSVGYGPRSKSKKVRSEVQY  
ESHHSDESELVTFSTDPATPVFTPAVPTRDTYDGRGDSL SYGLKSKSRKFRSEQY  
ESHHSDESELVTFSTDPATPVFTPAVPTRDTYDGRGDSL SYGLKSKSRKFRSEQY  
ESHHSDESELVTFSTDPATPVFTPAVPTRDTYDGRGDSL SYGLKSKSRKFRSEQY  
\*\*\*\*\*:\*\*\*\*\*:\*\*\*\*\* \*\*\*\*\*:\*\*\*\*\*:\*\*\*\*\* \*\*\*\*\*:\*\*\*\*\*:\*\*\*\*\*

XM\_014787875.1:*Ceratotherium simum simum*  
XM\_001496152.4:*Equus caballus*  
XM\_008523685.1:*Equus przewalskii*  
XM\_014842441.1:*Equus asinus*

PDATEEDLTSHVKSKEVGVHKA ILVAQGLHVASDWDSRGKDSL ETSQLDDHVS VETHSLE  
PDATEEDLTSPVESKDIDDVHKAVLVAQGLHVASDWDSRGKDSQETS QLDHVS VETHSRE  
PDATEEDLTSPVESKDIDDVHKAVLVAQGLHVASDWDSRGKDSQETS QLDHVS VETHSRE  
PDATEEDLTSPVESKDIDDVHKAVLVAQGLHVASDWDSRGKDSQETS QLDHVS VETHSRE  
\*\*\*\*\*:\*\*\*\*\*:\*\*\*\*\* \*\*\*\*\*:\*\*\*\*\*:\*\*\*\*\* \*\*\*\*\*:\*\*\*\*\*:\*\*\*\*\*

XM\_014787875.1:*Ceratotherium simum simum*  
XM\_001496152.4:*Equus caballus*  
XM\_008523685.1:*Equus przewalskii*  
XM\_014842441.1:*Equus asinus*

HSKEYQLKANDETSEHSDVIDSHENSKFSHERHSQEFHSREDKLVLD RKSEEDKYLKFR  
HSKEYQLKANDETSEHSDVIDSRENSKVSQEFPSQEFHSSEGLVDRDRKSEDEDKYLKFR  
HSKEYQLKANDETSEHSDVIDSRENSKVSQEFPSQEFHSSEGLVDRDRKSEDEDKYLKFR  
HSKEYQLKANDETSEHSDVIDSL ENSKVSQEFPSQEFHSSEGLVDRDRKSEDEDKYLKFR  
\*\*\*\*\*:\*\*\*\*\*:\*\*\*\*\* \*\*\*\*\*:\*\*\*\*\*:\*\*\*\*\* \*\*\*\*\*:\*\*\*\*\*:\*\*\*\*\*

XM\_014787875.1:*Ceratotherium simum simum*  
XM\_001496152.4:*Equus caballus*  
XM\_008523685.1:*Equus przewalskii*  
XM\_014842441.1:*Equus asinus*

VSHELDSASSEVN  
TSHESESASSEVN  
TSHESESASSEVN  
TFHESESASSEVN  
. \*\* :\*\*\*\*\*

Table S1.5: Osteopontin in Perissodactyla.

|                                                       |                                                                  |
|-------------------------------------------------------|------------------------------------------------------------------|
| XM_013004835.1: <i>Echinops telfairi</i>              | MRAAVLCCLLGLIAYALPVKHPADSGSSEEKQT-----                           |
| NW_016536240.1: <i>Manis javanica</i>                 | MRIAVICFSLGLIACITLQVKK--QADSRSSSEEKQLYQKYPDAVASWLKSDPSHKQILLALQN |
| NW_006408627.1: <i>Chrysochloris asiatica</i>         | MRIAVICFCLLGLIAYALPAKYHTESGSSEEKQLHIKYPDAVATWLKPDPSQKQILLAPQK    |
| XM_003414088.3: <i>Loxodonta africana</i>             | MRTAVICFCLLGLIAYALPVKYQADSGSSEEKQLHSHKHPDVTATWLKPDVSYKQILLAPQN   |
| XM_012559624.2: <i>Trichechus manatus latirostris</i> | MRIAVIYFCLLGLIAYALPVKHQADSGSSEEKQLYSKYPDAVDTWLKPDPSPYKQILLAPQN   |
|                                                       | ** *: .***** :**.* ::* *****                                     |
| XM_013004835.1: <i>Echinops telfairi</i>              | -----FPSKSYQSHDQTTDDVDA-DDSDHKSQSQSVESDDSDDDHDADEPDH             |
| NW_016536240.1: <i>Manis javanica</i>                 | TVSSEETDNFKQETLPSRSNESHD---DVDDEEDGDNRDSQDSADASKSDDVDHTDDPDD     |
| NW_006408627.1: <i>Chrysochloris asiatica</i>         | AISSEEDHLKQETLPSKSNESQDLTDDVDDEDDSDHVNNQDSVESDDSEDDHTDDPDR       |
| XM_003414088.3: <i>Loxodonta africana</i>             | AVSSEENDKLLQETLPSKSNESQDTNDDVDEDDGDHVDSDQSVESDDLDHDDHTDDPYH      |
| XM_012559624.2: <i>Trichechus manatus latirostris</i> | AVSSEETDDLKQETLPSKSNESQDTNDSVDEDDGEQVDSQDPIDSDDTHEDDHTDDSNH      |
|                                                       | :***: :**.* :** :*.: :..* :... :*.:*                             |
| XM_013004835.1: <i>Echinops telfairi</i>              | SDSHHSDESDEVT-----DVPATVLFVTSALPTDFYSDDGRGDSLGYAVRSKLRRIHEAV     |
| NW_016536240.1: <i>Manis javanica</i>                 | S-----DESDELVT-----DVPATPVFTPADPTG-DTNDGRGDSVAYGLRSKSKKFYRSA     |
| NW_006408627.1: <i>Chrysochloris asiatica</i>         | SDSHHSDESDELVTDFPTDMSATPVFTPVVPTV-DIYDGRGDSVAYGQKRSRKKI STPV     |
| XM_003414088.3: <i>Loxodonta africana</i>             | SDSHHSDESDELVTGFPTDDPGTPVFTPAVPTV-DTYDGRGDNVYRLSSKSKKSHKSV       |
| XM_012559624.2: <i>Trichechus manatus latirostris</i> | SNESNHSDESDELVTDFPTDDPATVFTPAVPTV-DTYDGRGDSVVYRLRSKSKKIPRSD      |
|                                                       | * *****.* * .* :** . ** *****.* * * : :                          |
| XM_013004835.1: <i>Echinops telfairi</i>              | IQFPDDFASD-----ENVKAIFFPSQVLKKVSSSESQQRDSRETRQPD--HSVE           |
| NW_016536240.1: <i>Manis javanica</i>                 | LQYPDATEDLTSQMESKEIDKARKATLVARSLRVPDWDSDQET-----SQLDQSQSAE       |
| NW_006408627.1: <i>Chrysochloris asiatica</i>         | ILYPDD----LTSLKKSEAFGDEHKAMSVQAMKKVSNWDSQQQGSSETSQED--HSVE       |
| XM_003414088.3: <i>Loxodonta africana</i>             | IQFPDATEDFTSRMESKELDDAHKAIKRVVKSRLKASDWDSDHQDSETSQLDD--HSVE      |
| XM_012559624.2: <i>Trichechus manatus latirostris</i> | IQHPHATEEDSISQMESKMLDDAHKAIKPVISLKKPFWDSDYQQDSRETSQDD--HSVE      |
|                                                       | : .* . ** : : . : * * * :*.*                                     |
| XM_013004835.1: <i>Echinops telfairi</i>              | TQSHERSKESALETEVESSERSDLNSQESSKVSQEAQSQEFHSHED-----              |
| NW_016536240.1: <i>Manis javanica</i>                 | TNSQGYKEYTLKAKDESNEHADVI GNKEDSKVSQ----EFS-HEDKLVFDPKSREED-      |
| NW_006408627.1: <i>Chrysochloris asiatica</i>         | THSLEQSKYKLRKANDVSSSEHSDMIDSLNSKVSQ----EFHSHEDKHLPSKSEDEDQ       |
| XM_003414088.3: <i>Loxodonta africana</i>             | THSLEQSKYKLRKANDVSSSEHSDMIDSLNSKVSQ----EFHSHEDKLRPDPESEEQDK      |
| XM_012559624.2: <i>Trichechus manatus latirostris</i> | THSLEQSKYKLRKANDVSSSEHSDTIHSQEDSRVSD----ELHSREDKYYDPKSEEDK       |
|                                                       | *:* * : : * .* : . * .* : * * : * : *                            |
| XM_013004835.1: <i>Echinops telfairi</i>              | -----                                                            |
| NW_016536240.1: <i>Manis javanica</i>                 | KLKFRISHELDSESEAN                                                |
| NW_006408627.1: <i>Chrysochloris asiatica</i>         | QLKFRISHELESTSYEIN                                               |
| XM_003414088.3: <i>Loxodonta africana</i>             | HLKFRISHELES-----                                                |
| XM_012559624.2: <i>Trichechus manatus latirostris</i> | HLKFRISHELES-----                                                |

**Table S1.6: Osteopontin in Afrotheria and Xenarthra.**

XM\_001370458.3:Monodelphis domestica  
XM\_003772957.3:Sarcophilus harrisii  
XM\_020988577.1:Phascolarctos cinereus

-MRTAVICFCLLGIVSALPVKHQINSGSSEERRLYNKHPNLVATWLNADPSQKQTLLATQ  
MMRTAVICFCLLGIVSALPVKQQINSGSSEEEKQLYSKHPNFVATWLNADPSQKQTLLATQ  
-MRTTIVICFCLLGIISAWPVKQQINSGSSEEEKPLYSKHPDFVATWLNDDPSQKQTLLATQ  
\*\*\*:\*\*\*\*\*:\*\*\* \*\*\*:\*\*\*\*\*: \*\* .\*\*\*:\*\*\*\*\* \*\*\*\*\*

XM\_001370458.3:Monodelphis domestica  
XM\_003772957.3:Sarcophilus harrisii  
XM\_020988577.1:Phascolarctos cinereus

NSVSSEESTEDLQOTLPSNSNESPDTTDDVDDDDDDGHKSTDSDDSDDESDEVVTDFTP  
NSLSSEESTEDLQETLPRNSSESPDDIDDEDDDDGDH-NKSIDSDDSDDESDEVVTDLPTD  
NSVSSEESTEDLQETLPTNSDEIPDDIDDDDNEDGDGEGHKSTDSDDSDDESDEVVTDFTP  
\*\*:\*:\*\*\*\*\*:\*\*\* \*\*.\* \*\* \*\* \*:\*:\*.\* .:\*\* \*\*\*\*\*:\*\*\*

XM\_001370458.3:Monodelphis domestica  
XM\_003772957.3:Sarcophilus harrisii  
XM\_020988577.1:Phascolarctos cinereus

IPTTSSFLPDGPTRGDNSGRGDSVAYGLRSKVGAPDISSAETHVTEEDLTSQMESYESE  
TPATPSFLPDGPTRGDNGGRGDSVAYGLRSKLGAPYRSSEQVHDVTEEDLTSQIESYESE  
TPVTSSFLPDGPTRGDNGGRGDSVAYGLRSKVGVPYRSSEQVHDITEEDLTSQMESYESE  
\*.\* \*\*\*\*\*.\*\*\*\*\*:\*. \* \*\* :.\*:\*\*\*\*\*:\*\*\*\*\*

XM\_001370458.3:Monodelphis domestica  
XM\_003772957.3:Sarcophilus harrisii  
XM\_020988577.1:Phascolarctos cinereus

KAHKAFPLSQNLPKVSAWGSNSKESNEASHPDEYSVETYSHEQFKSYQLEETNPDSQQQG  
KTHKAIPLSQTFPKVSSWESNGQESNEASQADEYSVETHSHEQLKSSQLERNIYDSQQQS  
KIHKVFPLSQNLAKVSAWNSNSKDSNEASHPDEHSVETQSHEQLKSYRLEQNSYDSQQQS  
\* \*\* .:\*\*\*\*. : \*\*\*:\* \*\* .:\*\*\*\*\*: \*\*:\* \*\* \*\*\*:\*\* :\*\*.. \*\*\*\*\*.

XM\_001370458.3:Monodelphis domestica  
XM\_003772957.3:Sarcophilus harrisii  
XM\_020988577.1:Phascolarctos cinereus

DSHDSQENDKVSQEFR-----TQEVNKLQEFQSQESHVPNDPESVENTKYLK  
DSHGSQENDKVSQEFHNREVDKDSQEFHKKQVVGKLSQEFYHSQEVHLVSDPESVENIKPLK  
DSHGSQENDKVSQEFHSP EVDKDSQEFRKLVNKLQEFYHSQEVHLVSDPESVENAKHLK  
\*\*\*.\*\*\*\*\*: . :\*.\*:\*\*\*\*\*:\*\*\* \* ..\*\*\*\*\* \* \*\*

XM\_001370458.3:Monodelphis domestica  
XM\_003772957.3:Sarcophilus harrisii  
XM\_020988577.1:Phascolarctos cinereus

LHSFPEADSASYEAH  
LHS-HEVDSASFETH  
LHSSHEIDSASSEVH  
\*\*\* \* \*\*\*\*\* \*.\*

Table S1.7: Osteopontin in Marsupialia.

XM\_008574253.1: *Galeopterus variegatus*  
XM\_016213045.1: *Miniopterus natalensis*  
XM\_019668067.1: *Hipposideros armiger*  
XM\_019719344.1: *Rhinolophus sinicus*  
XM\_016161109.1: *Rousettus aegyptiacus*  
XM\_011356310.2: *Pteropus vampyrus*  
XM\_006910714.2: *Pteropus alecto*  
XM\_014452112.2: *Myotis lucifugus*  
NW\_007370672.1: *Eptesicus fuscus*  
KE161812.1: *Myotis brandtii*  
KB104739.1: *Myotis davidii*

-----MRIAVICSCLLGIYALPVKQPDSGSSEEKQLYNKYPDAMA AWLKPDPSPQKQ  
-----MRAAVICFCLLGIAYALPVKCRADSGSSEERQLY-KHPDAVATWLKPDPAQKQ  
-----MRIAVVCFCLLGIAYTLPVKHIDSGSSEEKQLYQKYPDAVATWLKPDPSQKQ  
-----MRIAVICFCLLGIAYTLPVKHADSGSSEERQLYNKYPDAVATWLKPDPSQKQ  
-----MRIAVICFCLVGIAYALPVKHADSGSSEERQLFNKYPDAVATWLKPDPSQKQ  
-----MRIAVICFCLVGMAYALPVKHADSGSSEERQLFNKYPDAVATWLKPDPSQKQ  
-----MRIAVICFCLVGMAYALPVKHADSGSSEERQLFNKYPDAVATWLKPDPSQKQ  
----MTCTVDTSQPLSPPPSPKGLMNKVTMVAAMELYNKHPDAVATWLKPDPSQKQ  
-----MRTAVIFFCFLAITTAFPVKHADSGSSEERQLYNKHPDAVATWLKPDPSQKQ  
-----MRIAVICFCLLGIAYALPVKHADSGSSEERQLYNKHPDAVATWLKPDPSQKQ  
-----MRIAVICFCLLGITSA L PVKHADSGSSEEKQLYNKHPDAVATWLKPDPSQKQ  
\* : : : : : : : \* : \* : \* : \* : \* : \* : \* : \* : \* : \* : \*

XM\_008574253.1: *Galeopterus variegatus*  
XM\_016213045.1: *Miniopterus natalensis*  
XM\_019668067.1: *Hipposideros armiger*  
XM\_019719344.1: *Rhinolophus sinicus*  
XM\_016161109.1: *Rousettus aegyptiacus*  
XM\_011356310.2: *Pteropus vampyrus*  
XM\_006910714.2: *Pteropus alecto*  
XM\_014452112.2: *Myotis lucifugus*  
NW\_007370672.1: *Eptesicus fuscus*  
KE161812.1: *Myotis brandtii*  
KB104739.1: *Myotis davidii*

NLLAPQNAVSS EIDNFKQETLPSKSNESHDLTDDVDDDDGDHVDSQDSIDSDFDDT-  
NLLAPQNTVSSEETDDFKQETLPSKSNESHDLTDDVDDDDSNHVDSQDSTDSNDSDDA-  
NLLAPQNAVSS EETDDLKQETLPSASHESHDLTDDMDDDD--DHVDSQDSTDSIDSDDA-  
NLLAPQNAVSS EETADFKQETLPSKSNESHDLTDDVDDDD--EHVDSQDSIDSNESDDAD  
NLLAPQNTVSSEETD NFKQETLPSKSNESHDLTDDVDDDEDEDHVDSQDHIDSIDSDDA-  
NLLAPQNTVSSEETD NFKQETLPSKSNESHDLTDDVDDDEDEDHVDSQDHIDSIDSDDA-  
NLLAPQNTVSSEETD NFKQETLPSKSNESHDLTDDVDDDEDEDHVDSQDHIDSIDSDDA-  
SLLAPQNTVSSEETD DFKQETLPSKSNES QDHTDDVDD--DEDRVDSQDSIDSNDSDDD-  
NLLAPQNTVSSEETD DFKQETLPSKSNES QDHTDDVDD--DEDHVDSQDSIDSNDSDDD-  
SLLAPQNTVSSEETD DFKQETLPSKSNES QDHTDEVD--DEDHVDSQDSIDSNDSDDD-  
SLLAPQNTVSSEETD DFKQETLPSKSNES QDHTDDVDD--DEDHVDSQDSIDSNDSDDD-  
.\*\*\*\*\* :\*\*\*\*\* : :\*\*\*\*\* \* : \* : \* : \* : \* : \* : \* : \* : \*

XM\_008574253.1: *Galeopterus variegatus*  
XM\_016213045.1: *Miniopterus natalensis*  
XM\_019668067.1: *Hipposideros armiger*  
XM\_019719344.1: *Rhinolophus sinicus*  
XM\_016161109.1: *Rousettus aegyptiacus*  
XM\_011356310.2: *Pteropus vampyrus*  
XM\_006910714.2: *Pteropus alecto*  
XM\_014452112.2: *Myotis lucifugus*  
NW\_007370672.1: *Eptesicus fuscus*  
KE161812.1: *Myotis brandtii*  
KB104739.1: *Myotis davidii*

DHTDDSHHSDESHHSDESDELVTDF----PTRVPATPV-ATPAVPTIDTYDGRGDSVAYR  
DQTDDSDNSDESHHSDESDELVTDF----PTDFPGTLI-VTPPVPTRDTYDGRGDSVAYG  
DHTDDSDNSDESHHSDESDELVTDF----PTDLPGTPI-VTPAPPTRDTYNGRGDSVAYG  
DRTDDSDNSDESHHSDESDELVTDF----PTDLPGTGTVVTPVPTRTYNGRGDSVAYG  
DNTDDSDNSDESHHSDESDELVTDF----PTDIPETPV-ATPAIPTRTDNDGRGDSVAYR  
DHTDDSDNSDESHHSDESDELVTDF----PTDFPGTPV-VTPAVPTRDTNDGRGDSVAYR  
DHTDDSDNSDESHHSDESDELVTDF----PTDFPGTPV-VTPAVPTGDTNDGRGDSVAYR  
DRTDDSDNSDESHHSDESDELVTDF----PTDFPGTPF-ATPAVPTIDTNDGRGDSVAYG  
DHTDDSDNSDESHHSDESDELVTDF----PTDFPGTPF-ATPAVPTIDTNDGRGDSVAYG  
GHTDDSDNSDESHHSDESDELVTDF----PTDFPGTPF-ATPAVPTIDTNDGRGDSVAYG  
DHTDDSDNSDESHHSDESDELVTDFPTDFPTDFPGTPF-ATPAVPTIDTNDGRGDSVAHG  
..\*\* .\*\*\*\*\* :\*\*\*\*\* :\*\*\*\*\* \*\* . \* \* \*\* \*\* \* :\*\*\*\*\* :



|                                               |                                                                 |
|-----------------------------------------------|-----------------------------------------------------------------|
| XM_008574253.1: <i>Galeopterus variegatus</i> | LRSKSKKFHRADVQYPDTTEEDLTSHVSEEFDDAH---KATPVAQGLSVPSDWDSHGKD     |
| XM_016213045.1: <i>Miniopterus natalensis</i> | LKSKSKKFHRPAAQYPPATEEDLTSHVSENEADEAH---KAVLVAQGLHVASDWDSHGRE    |
| XM_019668067.1: <i>Hipposideros armiger</i>   | LRSKSKKFHRSAIQYPPATEEDLTSHMSEEMDDAH---KAVLVAQGLQVASDWDSHGKD     |
| XM_019719344.1: <i>Rhinolophus sinicus</i>    | LRSKSKKFHRSAVQYPPATEEDLTSHVSEEDVDDAH---KAILVAQGLQVASDWDSHGKD    |
| XM_016161109.1: <i>Rousettus aegyptiacus</i>  | LKSKSKKFHRSVVQYPPATEEDLTSHVSEKEMDDVRKAVKAVFVAQGLHVASDWDSPGKD    |
| XM_011356310.2: <i>Pteropus vampyrus</i>      | LKSKSKKFHRSVVKYPPATEEDLTSHVSEKVVDDARKAVKAVFVAQGLRVASDWDSPGKD    |
| XM_006910714.2: <i>Pteropus alecto</i>        | LKSKSKKFHRSVVKYPPATEEDLTSHVSEKVVDDARKAVKAVFVAQGLHVASDWDSRPRKD   |
| XM_014452112.2: <i>Myotis lucifugus</i>       | LRLKSKKLHRSVVQYPPATEEDLTSHMSEDEMDDAH---RAILVAQGLPVASDWDSRGKD    |
| NW_007370672.1: <i>Eptesicus fuscus</i>       | LRLKSKKLHRSVGVQYPPATEEDLTSHMSEDEMDDAH---RAILVAQGLPVASDWDSRGKD   |
| KE161812.1: <i>Myotis brandtii</i>            | LRLKSKKLHRSVVQYPPATEEDLTSHMSEDEMDDAH---RAILVAQGLPVASDWDSQGKD    |
| KB104739.1: <i>Myotis davidii</i>             | LRLKSKKLHRSVVQYPPATEEDLTSHMSEDEMDDAH---RAVLAQGLPVASDWDSRGKD     |
|                                               | *: ***** :*****:***: .:.: :*: ***** * **** ::                   |
| XM_008574253.1: <i>Galeopterus variegatus</i> | SHETSKLDDQSVETYSYKQSKLHKRKASDESNEHSDGIDSREHSKDSPEFHSEEFHSHED    |
| XM_016213045.1: <i>Miniopterus natalensis</i> | SQETISLLDDHDSVETHSLKLEKEYQLKAIGQSNHSDGIDSPENVKISHEFHSEELGSEYED  |
| XM_019668067.1: <i>Hipposideros armiger</i>   | SQETSQQLDDHDSVETLSRKLKSEYKCLKANDESHHPDVIDSQESSKVSHEFHSEEFHSHED  |
| XM_019719344.1: <i>Rhinolophus sinicus</i>    | SQETSQQLDDHDSVETYSHKHKEYKCLKAKANDESHSDVIDSQENSKVSEFHSEEFHSHED   |
| XM_016161109.1: <i>Rousettus aegyptiacus</i>  | SQETSQQLNDHSTETRSLEHSEAYKCLKANDESNHGADVIDSRENSKVSHEFHSEEFHSHED  |
| XM_011356310.2: <i>Pteropus vampyrus</i>      | SQETSQQLDDHSTETHSLEHSEYKCLKANDESNHGADVIDSQENSKVSEFHSEEFHSHED    |
| XM_006910714.2: <i>Pteropus alecto</i>        | SQETSQQLDDHSTETHSLEHSEYKCLKANDESNHGADVIDSQENSKVSEFHSEEFHSHED    |
| XM_014452112.2: <i>Myotis lucifugus</i>       | SQETSQQLDDHDSVETHSHEAAKEYKCLKAMDASNEHSDGIDSQENSRVSEFHSEELQSHED  |
| NW_007370672.1: <i>Eptesicus fuscus</i>       | SQETRHLDDHDSVEIHSQELAKEYKCLKAMDASNEHSDGIDSQENSRVSEFHSEELHSHED   |
| KE161812.1: <i>Myotis brandtii</i>            | SQETASQQLDDHDSVETHSREAAKEYKCLKAMDASNEHSDGIDSQENSRVSEFHSEELQSHED |
| KB104739.1: <i>Myotis davidii</i>             | SQETSQQLDDHDSVETHSHELAKGYKCLKAMDASNEHSDGIDSQENSRVSEFHSEELQSHED  |
|                                               | ** * :*:*. * * : : : : * * . * : * * * * * : * * * * * : * * *  |
| XM_008574253.1: <i>Galeopterus variegatus</i> | KLVIDPKSKEEDKQLKFRISHELESASSEVD                                 |
| XM_016213045.1: <i>Miniopterus natalensis</i> | KPALHPKSEEQDKHLKFRVSHELESASSTEVN                                |
| XM_019668067.1: <i>Hipposideros armiger</i>   | KLVPDPKSQEQDKHLKFRISHELESASSEVN                                 |
| XM_019719344.1: <i>Rhinolophus sinicus</i>    | KLVIDPKSSEEQDKHLKFRVSHELESASSEVN                                |
| XM_016161109.1: <i>Rousettus aegyptiacus</i>  | KLALDPKSEEQDKHLKFRISHELESASSEVN                                 |
| XM_011356310.2: <i>Pteropus vampyrus</i>      | KLALDPKSEDQDKHLKFRISHELESASSEVN                                 |
| XM_006910714.2: <i>Pteropus alecto</i>        | KLALDPKSEDQDKHLKFRISHELESASSEVN                                 |
| XM_014452112.2: <i>Myotis lucifugus</i>       | KLASAPQSEEQDKHLKFRISHELESASSEVN                                 |
| NW_007370672.1: <i>Eptesicus fuscus</i>       | KLASDPQSEEQDKHLKFRISHELESASSEVN                                 |
| KE161812.1: <i>Myotis brandtii</i>            | KLASAPQSEEQDKHLKFRISHELESASSEVN                                 |
| KB104739.1: <i>Myotis davidii</i>             | KLASDPQSEEQDKHLKFRISHELESASSEVN                                 |
|                                               | * . * :*:*:*:*:*:*:*:*:*:*:*:*:*                                |

**Table S1.8: Osteopontin in Chiroptera.** The *Myotis lucifugus* sequence possibly reflects transcription or translation from an alternative start site. The duplication of PTFD in only one representative of *Myotis* could be a mutation or an error in data entry.

XM\_016191814.1:*Erinaceus europaeus*  
 XM\_012523397.2:*Dasypus novemcinctus*  
 XM\_007951712.1:*Orycteropus afer afer*  
 XM\_007184118.1:*Balaenoptera acutorostrata scammoni*

```
MKPLEQLNSGQCCLPAASQRRQTRTASSRTGFSLCKQGPTTMRVTVICLCLLGIV
-----YARPCTRNLTLLSFFIF
-----MRIAVICFCLLQVA
-----MRIAVICFCLLQIA
      .: : .: .: :
```

XM\_016191814.1:*Erinaceus europaeus*  
 XM\_012523397.2:*Dasypus novemcinctus*  
 XM\_007951712.1:*Orycteropus afer afer*  
 XM\_007184118.1:*Balaenoptera acutorostrata scammoni*

```
SAFPVKQ-TDSGSSEETH-----NAVS---TEDFSQET
SVSKVKHQADSGSSEKQLYDKYPDAVAWLKPDPSQKETTLLAPQNAVSSSEETDNFKQDT
STFPVKRQADSGSSEKQLYNKYPAVATWLKPDPSHKQTLLASQNTLSSEETDDLKQET
SALPVKH-TDSGSSEKQLYNKYPAIATWLKPDPSQKQTFLAPQNTVSSEETADNKQET
* .  ** : :***** : .          . : * : * : *:
```

XM\_016191814.1:*Erinaceus europaeus*  
 XM\_012523397.2:*Dasypus novemcinctus*  
 XM\_007951712.1:*Orycteropus afer afer*  
 XM\_007184118.1:*Balaenoptera acutorostrata scammoni*

```
APSSNESPEHTDDADDRDGDLSQDALDSHNSDEDDDDDEAEDTSSDESHESSDESDET
LPKSNESHDTNADDEDGDHVD---SRDSDSNESDHNDPPDHSDESHHSESDEEVV
LPKSNESLDQTDVDEDDGDHVD---SQESDSEDHDTDDPYHSDESHHSESDELV
LPKSNESPEHTDQVDEDDGDSQD---TDAN-----DSNDADHSDSHHSESDEEVV
** .*** : :** .**.* . . . * : . . . : * ***** .
```

XM\_016191814.1:*Erinaceus europaeus*  
 XM\_012523397.2:*Dasypus novemcinctus*  
 XM\_007951712.1:*Orycteropus afer afer*  
 XM\_007184118.1:*Balaenoptera acutorostrata scammoni*

```
TEFPTDNPATIVFTPAPTGD-YDGRGDSVAYGLRSKAKKLHRLDVQ---ETEEDLTSYM
TDFTTDAPATP----VVPTEDAYNGRGDSVAYGLESKS-KLYRSKIQFDATEEDLTSHM
TDFPTEVPATPVFTPAVPTVETDYDGRGDSVASRLKSKSKKIYRSVIQYPPDTE-ELTSHM
TDFPTDVPATSVFTPPVPTGDTYDGRGDSVAYGLRSKSKKFRRSEVQYPPATEEDVTSHV
*: * : * * . * * : :***** * . ** : * : * : * * ** : : *:
```

XM\_016191814.1:*Erinaceus europaeus*  
 XM\_012523397.2:*Dasypus novemcinctus*  
 XM\_007951712.1:*Orycteropus afer afer*  
 XM\_007184118.1:*Balaenoptera acutorostrata scammoni*

```
ESREGGDPK---VAKHLQVSATWDSDESPGKS-----
ERGLDDAHRVIHVARRLNRASDWDSHGKDSQETRQLD-DHSVETHSHEQSKS--RKASH
RSKELDDVPKAVISVVHLKRASDWDSHPQDSHEVSQLEISHSVETHSHEQSK--ELEAKD
ESEEVDAPKAILVAQLHRSSDWDSRGKDSQETSQPD-DRSVETHSREHSKEFKLKAED
. . . * : . . : * : : * * . . .
```

XM\_016191814.1:*Erinaceus europaeus*  
 XM\_012523397.2:*Dasypus novemcinctus*  
 XM\_007951712.1:*Orycteropus afer afer*  
 XM\_007184118.1:*Balaenoptera acutorostrata scammoni*

```
-----GVSH----ESHSLNSLPEPQS-QEDRQLKFRVSHIELDSASSE
ESNEHSDVIDSRENSKVSHEFNQSESHSHEDKLVLGPKSKEEDKHLKFHTSHELESASSE
ESNERSDMIQSQEIFSKVSHEFNQSQEFHSQEDKPHRDPKSVESQHLKFRVSHIELDSASSE
ESSERSDVIESQDNSKVSHELHSQEFHSREDKLVPLKSEEDKHLKFRVSHIELDSASSE
          ***       * * * : .   : * : : : * * : * * * * * *
```

XM\_016191814.1:*Erinaceus europaeus*  
 XM\_012523397.2:*Dasypus novemcinctus*  
 XM\_007951712.1:*Orycteropus afer afer*  
 XM\_007184118.1:*Balaenoptera acutorostrata scammoni*

```
VN
IN
TN
VN
*
```

**Table S1.9: Osteopontin in various Eutheria.** The available *Dasypus novemcinctus* sequence may be reflective of transcription or translation from an alternative start site.

XM\_012934005.1:*Sorex araneus*  
XM\_004681418.2:*Condylura cristata*  
XM\_006885312.1:*Elephantulus edwardii*  
XM\_012928520.1:*Ochotona princeps*  
KB320503.1:*Tupaia chinensis*  
D11411.1:*Cryctolagus cuniculus*

-----  
-----  
-----  
-----  
MARLWVQVQRPLRGLRAHVYDEGQAMSGMERGIGPIESAVTFKAREDQAAGSRQQPEEAG  
-----

XM\_012934005.1:*Sorex araneus*  
XM\_004681418.2:*Condylura cristata*  
XM\_006885312.1:*Elephantulus edwardii*  
XM\_012928520.1:*Ochotona princeps*  
KB320503.1:*Tupaia chinensis*  
D11411.1:*Cryctolagus cuniculus*

-----MRTAVICLCLLGIASALPVKTT-  
-----MRIAVICFCLLGIIVSALPVKQG-  
-----MRIAVICFCLLGIAYALPVKHQA  
-----MRIAMISFCLLGMAYALPIKHS-  
-----ASHVGT AQLLVGTRPGEP AVRSAAVRAFQGF PWKNHNMRVAVICFCLIGIAYALPVKQP-  
-----MRIAVICFCLLGMAYALPVKHA-  
\*\* \*:\*.:\*\*\*:\*. \*\*:\*

XM\_012934005.1:*Sorex araneus*  
XM\_004681418.2:*Condylura cristata*  
XM\_006885312.1:*Elephantulus edwardii*  
XM\_012928520.1:*Ochotona princeps*  
KB320503.1:*Tupaia chinensis*  
D11411.1:*Cryctolagus cuniculus*

DSGSSEEKQ-----TLPSKSTESE  
DSGSSEEKQ-----SLPSVSDASN  
TSGSSEEKQLNLYKYPDAVATWLKPDPSHKQALLPPQTAVSSEETDLLKQETLPSQSNESP  
DSGSSEEKQLYQKSPDDLAAWLS PDPSQKQNL LSVKDDASSEKSDFKQQTLP SKLQESH  
DSGSSEERQLYNKY PDAVATWLKPDPSL KQNL LAPQH AVSSEETDDLKQETLP STSNESH  
DSGSSEEKQLYHKHPDALATWLNPDPSQKQNL LTPQNA MSSEKDDLKQETLP SKSIESH  
\*\*\*\*\*:.\* :\*\*\* \*\*

XM\_012934005.1:*Sorex araneus*  
XM\_004681418.2:*Condylura cristata*  
XM\_006885312.1:*Elephantulus edwardii*  
XM\_012928520.1:*Ochotona princeps*  
KB320503.1:*Tupaia chinensis*  
D11411.1:*Cryctolagus cuniculus*

DHTDDLDDDDQADSQ---DSVDEADDDDDDD-----NNSDHSDESEETTTDSSMD  
----DVDDVDDGDNTE---ESRDSTDSDDDDHSDD-----SDESHHSDESEDEMATDSPTD  
DHTDDVDEDDIDHV---DSKDSTESDDSEDHTDDDPYHSDESHHSDESEDELPTDSPTD  
DHMDDIDEDEDHNDSHSFI DSNDADDDDDDD-NQADD SHHSDESHHSDESEVVTDL LLE  
DHMDDVDEDDGNHV---DSQDS-DDSDDT-DHPDDSHHSDESHHSDESEDELVTDFPTD  
DHMDDIDEDEDDHV---DNRDS-NESDDA-DHPDDSHHSDESHQSDSEDEV-TVYPTD  
\*:\*: : : :. \* : : .\* : \* . . : : : : : : : : \*

XM\_012934005.1:*Sorex araneus*  
XM\_004681418.2:*Condylura cristata*  
XM\_006885312.1:*Elephantulus edwardii*  
XM\_012928520.1:*Ochotona princeps*  
KB320503.1:*Tupaia chinensis*  
D11411.1:*Cryctolagus cuniculus*

VPATLVFTPAVPTRDTNDGRGDSVDYGLR-LKSKKLLSSETQYSE----DLTSHMESEDED  
LPATVDYTPVVFTRDTYDGRGDSVAYGLK-SKSIKFYSAEDQYPDATKEDLASQMESREM  
DPSTPVFSPAMPTVDPYDGRGDSLGYGLK-SRSRP----QIQYSD-ETEDFFSHVSKSKEL  
SPATTAFTTEVVPTIETYDGRGDSVAYRLK-SKSKVLRISTAQFLGAAEDDLLSSHVDSQDM  
GPVTPVFTPAAPTMDAYDGRGDSVYRVR-SKPKTFRMSDVQYPPATEEDLASHLESKEL  
DAATTVFTEVVPTVETDYDGRGDSVAYRLKR SKSKM FHVSN AQYPGASEEDLLSSHVDS EDL  
\* : : . \* : \*\*\*\*\* : \* : : . \* : \* : \* : : \* :

|                                              |                                                                |
|----------------------------------------------|----------------------------------------------------------------|
| XM_012934005.1: <i>Sorex araneus</i>         | TQE-----SAPSLQMTSDGSDSHQEPAKSP-----                            |
| XM_004681418.2: <i>Condylura cristata</i>    | RNGPKATLVALNLQSTSDVDSQGEDSFQEK---DDSL-ENNGFEHSQEQYKLIKANDESSQ- |
| XM_006885312.1: <i>Elephantulus edwardii</i> | KDAHKIIPVVQALKKSSVWDSYQQDSHEPSQLSDLHSMETHSQEQSKEYTLKTDDVSSE-   |
| XM_012928520.1: <i>Ochotona princeps</i>     | DDARKAVLVAQHLNAPSDWDNHD-----DSKMDDHGMESQSRERVKQYKRDVKDDSMER    |
| KB320503.1: <i>Tupaia chinensis</i>          | DDEHKTIPARALHVPDWDSDHCKGKSQE-TSQLDDHSVETHSGEQAKRYKQKASVESNE-   |
| D11411.1: <i>Cryctolagus cuniculus</i>       | DDTPRAIPVAQHLNVPDWDSDQEKDSDH-VSQVDDHSVETQSHEQARQYKREANDNSVE-   |
|                                              | : . * : * * .                                                  |
|                                              |                                                                |
| XM_012934005.1: <i>Sorex araneus</i>         | -----ASLESHSRESQSLEGDA---QSPRVEEAHLKFRVSHELSESASSEAK           |
| XM_004681418.2: <i>Condylura cristata</i>    | -----KTPESSHLSHSQEFHNQEEKLDDLDPKSVVEEDTHLKFRVSHELDSTISSEVN     |
| XM_006885312.1: <i>Elephantulus edwardii</i> | HSDMLNSQEISKSNLEFHSQEFHSHEDKLHPDPKSTEE-EHLKFRNSHELESASSEAN     |
| XM_012928520.1: <i>Ochotona princeps</i>     | HSYSVDSRESSKVSQESH-----SHEDMLAIEPKSTEEDKPGKSSVSQELDSASSEIN     |
| KB320503.1: <i>Tupaia chinensis</i>          | HSDVIESQESAKVSHEFHSHREFLSHEDKLVLNKSKQEEDKHLKFRVSHELDSASSEVN    |
| D11411.1: <i>Cryctolagus cuniculus</i>       | HSHSIDSQESSKVSQESQSREFRSHEDKLAIEPKSEEDEEHRQLRVSHELDSTISSEIN    |
|                                              | . : . * . : : * : * : * : * : * : *                            |

**Table S1.10: Osteopontin in Lagomorpha and similar orders.** As alternative splicing of exons 4 or 5 has only been shown to occur in humans, there is no experimental evidence that osteopontin actually misses an internal sequence in *Sorex araneus* or *Condylura cristata*.

XM\_013029816.1:*Dipodomys ordii*  
XM\_023564932.1:*Cavia porcellus*  
XM\_004629257.2:*Octodon degus*  
NW\_004955474.1:*Chinchilla lanigera*  
KN124024.1:*Fukomys damarensis*  
JH171653.1:*Heterocephalus glaber*  
XM\_005341895.3:*Ictidomys tridecemlineatus*  
XM\_015499141.1:*Marmota marmota marmota*  
AB001382.1:*Rattus norvegicus*  
XM\_021211046.1:*Mus pahari*  
J04806.1:*Mus musculus*  
XM\_021162825.1:*Mus caroli*  
HM626723.1:*Apodemus agrarius*(partial)  
XM\_021659705.1:*Meriones unguiculatus*  
XM\_013350872.1:*Microtus ochrogaster*  
XM\_006975432.2:*Peromyscus maniculatus bairdii*  
AJ890352.1:*Mesocricetus auratus*  
HQ647182.1:*Cricetulus barabensis*(partial)  
XM\_007638075.2:*Cricetulus griseus*  
NW\_004504357.1:*Jaculus jaculus*  
XM\_020154612.1:*Castor canadensis*  
XM\_008830194.2:*Nannospalax galili*

-----MRIEVIFFCLIGITHSLPI---ESGSSEENQIFNKKYPISEASWLKLDLSEKNNL  
-----MRVTVICFCLLGIASSFPVKQADSGSSEKLLHD-NKLPEAASSWLKSDPSQKQNL  
-----MRIAGICFCLLGIAYSLPVKEADSFSSDHLRD-NKFPAMALWLKTDPSLKENI  
-MMLMLYFSLSGATATGQRWQKRTHNITSAAEELDFLY-NKLPEAMSSWLKSDPSQKENL  
-----MRIALICFCLLGIAYSLPVKQADSGSSEKLLY-NKLPEAVSSWLKPDPSQKQNL  
-----MRIAVICFCLLGIYSLPVNOADSGSSEKPLY-NKLPEAVSSWLKPDPSQKQNL  
-----MRFVAVIFFCLLGIAYSPVKQADSGSSEERQLY-NKHDAVATWLKPDPSQKQNL  
-----MRFVAVIFFCLLGIAYSPVKQADSGSSEERQLY-NKHDAVATWLKPDPSQKQNL  
-----MRLAVVCFCLFGLASCLPVKVAEFGSSEKHAHY-SKHSDAVATWLKPDPSQKQNL  
-----MRLAVICFCLFGIASSLPVKVTDSGSSEK-----  
-----MRLAVICFCLFGIASSLPVKVTDSGSSEK-LY-SLHDDPIATWLVPDPSQKQNL  
-----MRLAVICFCLFGIASSLPVKVTDSGSSEKMLY-SLHDDPIATWLVPDPSQKQNL  
-----PDPSPQKQTL  
-----MRFVAVICFCLFGIAAALPVKVSVSGSSEKLLY-NKHDAVATWLRPDPSEKQNL  
-----MRFVAVICFCLLGIASSFPVKVTDSGSSEENLLS-SKHTDAVATWLEPDPSPQKQNL  
-----MRFVAVVCFCLFGIASSLPVKVADSGSSEKLLY-SKHSDAVATWLEPDPSPQKQNL  
-----MRFVAVICFCLFGIASSLPVKVADSGSSEKLLHY-SKHTDAVATWLEPDPSPQKQNL  
-----MRLAVVCFCLFGIASSLPVKVADSGSSEKLLHY-SKHTDAVATWLEPDPSPQKQNL  
-----MRFVAVICFCLFGIASSLPVKVADSGSSEKLLHY-SKHTDAVATWLEPDPSPQKQNL  
-----MRAAMLCVCLFGLASCLPVKQADSGSSEETLIY-NKHLDAVATWLKPDPSQKQNL  
-----MRIAVIFFCLLGIAYSLPVKQADSGSSEKQLFNNKHADAVALWLKPDPSQKQNL  
-----MKIAVICFCLFGIASSLPVKLIDSGSSEKQLH-SKHDAVATWLKPDPSQKQNL

XM\_013029816.1:*Dipodomys ordii*  
XM\_023564932.1:*Cavia porcellus*  
XM\_004629257.2:*Octodon degus*  
NW\_004955474.1:*Chinchilla lanigera*  
KN124024.1:*Fukomys damarensis*  
JH171653.1:*Heterocephalus glaber*  
XM\_005341895.3:*Ictidomys tridecemlineatus*  
XM\_015499141.1:*Marmota marmota marmota*  
AB001382.1:*Rattus norvegicus*  
XM\_021211046.1:*Mus pahari*  
J04806.1:*Mus musculus*  
XM\_021162825.1:*Mus caroli*  
HM626723.1:*Apodemus agrarius*(partial)  
XM\_021659705.1:*Meriones unguiculatus*  
XM\_013350872.1:*Microtus ochrogaster*  
XM\_006975432.2:*Peromyscus maniculatus bairdii*  
AJ890352.1:*Mesocricetus auratus*  
HQ647182.1:*Cricetulus barabensis*(partial)  
XM\_007638075.2:*Cricetulus griseus*  
NW\_004504357.1:*Jaculus jaculus*  
XM\_020154612.1:*Castor canadensis*  
XM\_008830194.2:*Nannospalax galili*

LAPQNVLSSEETDVLQPETFSSNSNESH--MDELNE--DDIGNHMSQDFTESDSDHDS  
LAPQNAVMSSEETNDLKQETLPSNESHSHDMDDLDEDD--GDL-----DTD---DPN  
IVPQNVVSSEEDNGLQOETLPSNESHSHDMDDDDDDRDE-----DSVDT----  
LAPQNAVVSSEETDVLKQETLPSNESHSHDMDDVDDDD--GDC-----DTAD\$ADTD  
LESQNAVVSSEETDVLKQETLPSNERNRHDHMDVDDDD--GDC-----DSVDTDDDD  
LAPQNVVSSEETDVLKQETLPSNESHSHDMDDVDEDD--GDC-----DSVVDVDDDD  
LAPQNAVVSSEERDDFKQETLPSKSNESHSHDMDDVDDDD--GDHVNNQDSTDSDD\$DED-  
LAPQNAVVSSEERDDFKQETLPSKSNESHSHDMDDVDDDD--GDHVNNQDSTDSDD\$DDD-  
----NAVSSSEKDDFKQETLPSNESHSHDMDDDDDDDDDDGDHAESEDSVDS-----  
LAPQNAVVSSEKDDFKQETLPSNESHSHDMDDDDDDDDDDGDHAESEDSVDS-----  
LAPQNAVVSSEKDDFKQETLPSNESHSHDMDDDDDDDDDDGDHAESEDSVDS-----  
LALQNAVVSSEKDDFKQETLPSNESHSHDMDDDDDDDDDDGDHAESEDSVDS-----  
LAPQNVVSSEETDVLKQETLPSNESHSHDMDDDDDDDDDDGDHTE\$KDSLSDSDSDS--  
LAPQNVVSSEETDVLKQETLPSNESHSHDMDDDD--DDDDGDHAE\$QDSVDSDE\$SDD-  
LAPQNVVSSEETDALKQETLPSNESHSHDMDDDD--DDDRHAD\$QDSVDSDE\$SDED-  
LAPQNVVSSEETDVLKQETLPSNESHSHDMDDDN--DDDDGDHANS\$QDSVDSDE\$SDDD  
LAPQNVVSSEETDVLKQETLPSNESHSHDMDDDD--DDNDGDHANS\$QDSVDSDE\$SDEDD  
LAPQNVVSSEETDVLKQETLPSNESHSHDMDDDD--DDNDGDHANS\$QDSVDSDE\$SDEDD  
LAPQNVVSSEETDVLKQETLPSNESHSHDMDDDD--DDDDGDHVD\$SHDSVDSDE\$SDDTD  
LAPQNVVSSEETDVLKQETLPSNESHSHDMDDMD--DEDDGDHVD\$QDSVDSDE\$SDDTD  
LAPQNAVVSSEETDVLKQETLPSNESHSHDMDDDD--DDDRDHVDS\$QDSVDSDE\$D\$DAD  
: :\*\*\*\* : : \*\*: \* . : : : \* : : : : :

XM\_013029816.1:*Dipodomys ordii*  
 XM\_023564932.1:*Cavia porcellus*  
 XM\_004629257.2:*Octodon degus*  
 NW\_004955474.1:*Chinchilla lanigera*  
 KN124024.1:*Fukomys damarensis*  
 JH171653.1:*Heterocephalus glaber*  
 XM\_005341895.3:*Ictidomys tridecemlineatus*  
 XM\_015499141.1:*Marmota marmota marmota*  
 AB001382.1:*Rattus norvegicus*  
 XM\_021211046.1:*Mus pahari*  
 J04806.1:*Mus musculus*  
 XM\_021162825.1:*Mus caroli*  
 HM626723.1:*Apodemus agrarius*(partial)  
 XM\_021659705.1:*Meriones unguiculatus*  
 XM\_013350872.1:*Microtus ochrogaster*  
 XM\_006975432.2:*Peromyscus maniculatus bairdii*  
 AJ890352.1:*Mesocricetus auratus*  
 HQ647182.1:*Cricetulus barabensis*(partial)  
 XM\_007638075.2:*Cricetulus griseus*  
 NW\_004504357.1:*Jaculus jaculus*  
 XM\_020154612.1:*Castor canadensis*  
 XM\_008830194.2:*Nannospalax galili*

DHEHSHHHHDHHEH HKNSHSHSESEEVISL-PPPLTLETVPVFTPVFPAMSTLE-SHGDSN  
 D-----EDDAHHSNESDHSDESEDEVVTGGPPRIGSETPTSQPIVLTIIETFD-GRGDSL  
 -----DDPDHHSDES DHSDESEDEVVTEAP-TEGPETPAFSPIVPTVEIYD-GRGDSL  
 D-----ADDSHHSDES DHSDESEDEVVTEAP-TNGPETPVFTPIVPTVETVD-GRGDSL  
 H-----PDDSHHSDES DHSSESEDEVTDAP-TNSPETPVFTPIVPTIETIYDDGRGDS  
 H-----PDDSHHSDES DHSDESEDEVVTDAP-TNGPETPVFTPIVPTVETVD-GRGDSL  
 -----DSHHSDES SHHSDESEDEVVTEAP-TDGPDTVPVFTQIVPTVETVD-GRGDSV  
 -----DSHHSDES SHHSDESEDEVVTEAP-TDGPDTVPVFTQIVPTVETVD-GRGDSV  
 -----DESDES SHHSDESEDESFTAS---TQADVLTPVIAPTVDVDPD-GRGDSL  
 -----EESDES SHHSDESEDETFTAS---TQADTFTPIVPTVDVDPD-GRGDSL  
 -----DESDES SHHSDESEDETFTAS---TQADTFTPIVPTVDVDPN-GRGDSL  
 -----DESDES SHHSDESEDETFTAS---TQADTFTPIVPTVDVDPD-GRGDSL  
 -----NESDESH-----  
 -----DSHHSDESEESVTA---TLQTDVFTPLVPTVDTPA-ARGDSL  
 -----D-QPDDSHHSDESESVTA---TTQTEIIFTPVPTVEIIPD-GRGDSL  
 -----D-HPDDSHHSDESESFDT---TTQTEVFTPVPTVDIPD-GRGDSL  
 H-----PDDD-HPDDSHHSDESESVTA---TTQTEVFTPAVPTVEIIPD-GRGDSL  
 -----HPGDSHHSDESEDESITV---TTQTEVFTPAVPTVEIPN-GRGDSL  
 -----HPDDSHHSDESEDESITV---TTQTEVFTPAVPTVEIPN-GRGDSL  
 H-----HDDSHHSDES SHHSDESEDELVTDVP-TNGEQTQDFTPVPTVETFD-GRGDSV  
 H-----PDDSHHSDES SHHSDESEDELFTSSP-TTNGEQTQDFTPVPTVETFD-GRGDNV  
 D-----PDDSHHSDES SHHSDESEDELFTDTP-TTIPQTEVFTPVPTVYITVD-ARGDSL

.\*.

XM\_013029816.1:*Dipodomys ordii*  
 XM\_023564932.1:*Cavia porcellus*  
 XM\_004629257.2:*Octodon degus*  
 NW\_004955474.1:*Chinchilla lanigera*  
 KN124024.1:*Fukomys damarensis*  
 JH171653.1:*Heterocephalus glaber*  
 XM\_005341895.3:*Ictidomys tridecemlineatus*  
 XM\_015499141.1:*Marmota marmota marmota*  
 AB001382.1:*Rattus norvegicus*  
 XM\_021211046.1:*Mus pahari*  
 J04806.1:*Mus musculus*  
 XM\_021162825.1:*Mus caroli*  
 HM626723.1:*Apodemus agrarius*(partial)  
 XM\_021659705.1:*Meriones unguiculatus*  
 XM\_013350872.1:*Microtus ochrogaster*  
 XM\_006975432.2:*Peromyscus maniculatus bairdii*  
 AJ890352.1:*Mesocricetus auratus*  
 HQ647182.1:*Cricetulus barabensis*(partial)  
 XM\_007638075.2:*Cricetulus griseus*  
 NW\_004504357.1:*Jaculus jaculus*  
 XM\_020154612.1:*Castor canadensis*  
 XM\_008830194.2:*Nannospalax galili*

APEGKKS KSSDITNVQVSPFTDMFNGSKQSSLLGMQAVHIQLSFSKHKHNIFSKEGKEGKE  
 A-YGLRSRS-KKLPV-----  
 A-YLSRSRS-KKLHI-----  
 A-YRLRSRS-TKLHI-----  
 A-YGLRSRS-KKFSI-----  
 A-YGLRSRS-KKFHI-----  
 D-YGVRSKS-KKFYI-----  
 D-YGVRSKS-KKFYI-----  
 A-YGLRSRS-RSFPV-----  
 A-YGLRSRS-RSFQV-----  
 A-YGLRSRS-RSFQV-----  
 A-YGLRSRS-RSFQV-----  
 -----  
 A-YGLRA--RKLVL-----  
 A-YGLQSKS-RKIHI-----  
 A-YGLRSRS-RKFHI-----  
 A-YGLRAKS-RKFHI-----  
 A-----  
 A-YGLRSRS-RKFHI-----  
 V-YRLKSKS-RTFHI-----  
 A-YGLRSRYLKKFDI-----  
 A-YGLRSRS-RKIHI-----

XM\_013029816.1:dipodomys\_ordii GKEGKEGKEGKEGKEGKESHDEHLEHKLHDTLRVPIPIPHITHEDFSHPWES-K  
XM\_023564932.1:Cavia porcellus -----SDSQFSDVITDEDLTSHVKSQE  
XM\_004629257.2:Octodon degus -----SDAQDPDATDEDLTSHVSESQE  
NW\_004955474.1:Chinchilla lanigera -----SDAQDPDATDEDLTSHVSESQE  
KN124024.1:Fukomys damarensis -----SDAQYRDATDEDLTSHAESQE  
JH171653.1:Heterocephalus glaber -----SDPQYPAATDKDLTSNVSESQE  
XM\_005341895.3:Ictidomys tridecemlineatus -----SEVQYDPATDEDLTSHMESSE  
XM\_015499141.1:Marmota marmota marmota -----SEVQYDPATDEDLTSHMESAE  
AB001382.1:Rattus norvegicus -----SDEQYDPATDEDLTSRMKSQE  
XM\_021211046.1:Mus pahari -----SDEQYDPATDEDLTSHVNSGE  
J04806.1:Mus musculus -----SDEQYDPATDEDLTSHMKSGE  
XM\_021162825.1:Mus caroli -----SDEQYDPATDEDLASHVNSGE  
HM626723.1:Apodemus agrarius(partial) -----  
XM\_021659705.1:Meriones unguiculatus -----SDEQYSDATDEDLPSQV----  
XM\_013350872.1:Microtus ochrogaster -----PSDQFSDIIGEDLTSHLKSKE  
XM\_006975432.2:Peromyscus maniculatus bairdii -----SDDQYDPATDEDFTSHMKSKE  
AJ890352.1:Mesocricetus auratus -----SDDQYDPDTDEDLSSHMKSKE  
HQ647182.1:Cricetulus barabensis(partial) -----  
XM\_007638075.2:Cricetulus griseus -----SDDQDPDATDEDLSSHMKSKE  
NW\_004504357.1:Jaculus jaculus -----SDAKYDPATEEDLTSHMESSE  
XM\_020154612.1:Castor canadensis -----SDAQFSDATEEDLTSHIESSE  
XM\_008830194.2:Nannospalax galili -----SDIQYDPATHEDLTSHMESKD

XM\_013029816.1:Dipodomys ordii PHDTLKVPIPIPHIRFPTTEWDTLELEQHGLELRRSESKGSES-----NNNNHNNGDQ  
XM\_023564932.1:Cavia porcellus SHEAHQAVLLAQHLNVPDSDWDSHGKDSHESSQLDDELSVETHSQEHPREHTRKARDHSG--  
XM\_004629257.2:Octodon degus SSSAAHKAVLVAQRLNVPDSDWDSHGKDSHESSQLDDELSVETHSQEQRERKRKARDNSG--  
NW\_004955474.1:Chinchilla lanigera SSSDAHKAVLVAQRLNVPDSDWDSHGKDSHESSQLDDELSVETHSQEKSKEHKRKARDNSG--  
KN124024.1:Fukomys damarensis SSSDAHKAVLVAQHLNVPDSDWDSHGKDSHESSQLDDEQNVEHSQEQSREHKRKARDNS--  
JH171653.1:Heterocephalus glaber SSSDAQKAVLVAHRLNMPDSDWDSRGKDSHESSQLDDELSVETHSQEQSREHKRKARDNS--  
XM\_005341895.3:Ictidomys tridecemlineatus LNDAHKAIPVAHRLKVPDSDWDSHGKDSHETSQDDELSVETHSQEQTREYKRNARDN----  
XM\_015499141.1:Marmota marmota marmota LNDAHKVIPVAHRLKVPDSDWDSHGKDSHETSQDDELSVETHSQEQTREYKRNARDN----  
AB001382.1:Rattus norvegicus SDEALKVIPVAQRLSVPDSDQDSNGKDSHESSQLDEFSVETHSLEQSKKEYKQASHESTEIQ  
XM\_021211046.1:Mus pahari SKEALKVIPVAQRLSVPDSDQDSNGKASHESRQDDEFSLETHSLEQSKENK--ASHESADQ  
J04806.1:Mus musculus SKESLDVIPVAQRLSMPDSDQDNGKGSHESSQLDEFSLETHSLEHSHKESQ-----  
XM\_021162825.1:Mus caroli SKESLDVIPVAQRLSMPDSDQDNGKGSHESSQLDEFSLETHSLEHSHKESH-----  
HM626723.1:Apodemus agrarius(partial) -----  
XM\_021659705.1:Meriones unguiculatus -----YVPSDQDSNGKDSHESSQLDELSAETYRDGQAEHKKQD-SHDS---  
XM\_013350872.1:Microtus ochrogaster FDDVLKVIPVVRHLNVPDSDQDSHGKDSHESSQLDEFSVETQSEHQEQEDKQKASHES---  
XM\_006975432.2:Peromyscus maniculatus bairdii LDDALKVIPVAHRLNVPDSDWDSHGKDSHESSQLDEFSVETHSLEQSKEDKQKASHES---  
AJ890352.1:Mesocricetus auratus LVDTLKVIPVAHRLNVPDSDQDSHGKDSHESSQLDEFSVETHSLEQSKEDKQKASHES---  
HQ647182.1:Cricetulus barabensis(partial) -----  
XM\_007638075.2:Cricetulus griseus LVDTLKVIPVVRHLNVPDSDQDSHGKDSHESSQLDEFSVETHSLEQSKEDKQKASHES---  
NW\_004504357.1:Jaculus jaculus SDDALKVVPVAHRLHVPDSDWDSHGKDSHESSQLDEFSVETQSEHQPREYKQKTSHESES---  
XM\_020154612.1:Castor canadensis SDDALKVIPVAHRLKVPDSDWDSHGKDSHESSQLDEFSVETHSLEQSKEDKQKASHES---  
XM\_008830194.2:Nannospalax galili LDDLLKAVPVAQRLNVPDSDWDSHGKDSHESSQLDEFSVETHSLEQSKEDKQKASHES---

|                                                       |                                                  |
|-------------------------------------------------------|--------------------------------------------------|
| XM_013029816.1: <i>Dipodomys ordii</i>                | FSVSKKSKYKP-----DGPDS-L-----                     |
| XM_023564932.1: <i>Cavia porcellus</i>                | -----EHSDAVDS-REGARASPAIRSQEHHSQELRSQEHHSQELRSQE |
| XM_004629257.2: <i>Octodon degus</i>                  | -----EHSDVVDVDS-QEGAKASQEL-----                  |
| NW_004955474.1: <i>Chinchilla lanigera</i>            | -----EHSDQIDS-QESARASQEL-----                    |
| KN124024.1: <i>Fukomys damarensis</i>                 | -----EHSDVIES-QEGARASQEL-----                    |
| JH171653.1: <i>Heterocephalus glaber</i>              | -----EHSDVIDS-QEGARASQEL-----                    |
| XM_005341895.3: <i>Ictidomys tridecemlineatus</i>     | -----SSEHSDVIDS-QESSRVSQEFQ-----                 |
| XM_015499141.1: <i>Marmota marmota marmota</i>        | -----SSEHSDVIDS-QESSRVSQEFQ-----                 |
| AB001382.1: <i>Rattus norvegicus</i>                  | S-DAIDS-DAIDSAEKPDATDAERSDAIDS-QASSKASLEHQ       |
| XM_021211046.1: <i>Mus pahari</i>                     | -----SDVIESADQSDVIDS-QASFKASLEHQ-----            |
| J04806.1: <i>Mus musculus</i>                         | -----ESADQSDVIDS-QASSKASLEHQ-----                |
| XM_021162825.1: <i>Mus caroli</i>                     | -----ESADQSDVIDG-QASSKASLEHQ-----                |
| HM626723.1: <i>Apodemus agrarius</i> (partial)        | -----TEQSDEMY-SKEKLSKASWEAQ-----                 |
| XM_021659705.1: <i>Meriones unguiculatus</i>          | -----TELSDGIDS-KESSRASQAHA-----                  |
| XM_013350872.1: <i>Microtus ochrogaster</i>           | -----TELSDVIDS-KESSKASQEHQ-----                  |
| XM_006975432.2: <i>Peromyscus maniculatus bairdii</i> | -----TELSDVIDS-KESSKASQEHQ-----                  |
| AJ890352.1: <i>Mesocricetus auratus</i>               | -----TELSDVIDS-QESSKASQEHQ-----                  |
| HQ647182.1: <i>Cricetulus barabensis</i> (partial)    | -----TELSDVIDS-KESSKASQEHQ-----                  |
| XM_007638075.2: <i>Cricetulus griseus</i>             | -----TELSDVIDS-KESSKASQEHQ-----                  |
| NW_004504357.1: <i>Jaculus jaculus</i>                | -----IEHSDGIDS-SESSKVSQEFH-----                  |
| XM_020154612.1: <i>Castor canadensis</i>              | -----REHSDVIDS-QESSKVSQEVH-----                  |
| XM_008830194.2: <i>Nannospalax galili</i>             | -----SEHADVIDN-RENSKASQESH-----                  |

|                                                       |                                                         |
|-------------------------------------------------------|---------------------------------------------------------|
| XM_013029816.1: <i>Dipodomys ordii</i>                | --GSSKVSHKLSHNEFLSQEDMLVLDPRSIE-DKHPNFRISHELDSTSSSEAN   |
| XM_023564932.1: <i>Cavia porcellus</i>                | LRSQEHHSQELHSPELHSPELHSPVDPKSKEDEHLKIRISHELDSSASSEAN    |
| XM_004629257.2: <i>Octodon degus</i>                  | -----PSQEFPSHEDPQSKEEGRLEVRVSQELDSASSEAK                |
| NW_004955474.1: <i>Chinchilla lanigera</i>            | -----HSQEFHSHEDPQSREEGEHLKMRVSHELDSSASSEAN              |
| KN124024.1: <i>Fukomys damarensis</i>                 | -----H-----SHEDPKSKQDEHLKMSASRELDSSASSEAN               |
| JH171653.1: <i>Heterocephalus glaber</i>              | -----HSQEFPSHEDPKSKEDEHLKIRVSHELDSSVSSEAN               |
| XM_005341895.3: <i>Ictidomys tridecemlineatus</i>     | --SHES-----HSKEDKLVLDPKSKE-DKHLIFHVSHEIESASSEVN         |
| XM_015499141.1: <i>Marmota marmota marmota</i>        | --SHES-----HSNEDKLVLDPKSKEEDKHMIFRVSHEIESASSEVN         |
| AB001382.1: <i>Rattus norvegicus</i>                  | --SHEF-----HSHEDKLVLDPKSKEEDRYLKFRISHEIESSSSEVN         |
| XM_021211046.1: <i>Mus pahari</i>                     | --SHKF-----HSHEDKLVLDPKSKEEDRYLKFRFSHELDSSSSEIN         |
| J04806.1: <i>Mus musculus</i>                         | --SHKF-----HSHKDKLVLDPKSKEEDRYLKFRISHEIESSSSEVN         |
| XM_021162825.1: <i>Mus caroli</i>                     | --SHKF-----HSHKDKLVLDPKSKEEDRYLKFRISHEIESSSSEVN         |
| HM626723.1: <i>Apodemus agrarius</i> (partial)        | -----SPEF-----HSQEDKLVLDGAEKSKDENSLKFRVSHELDSSSSEVN     |
| XM_021659705.1: <i>Meriones unguiculatus</i>          | --SHEF-----HSHEDKLVLDGSKSKEEDANSLKFHISHEIESSSSEVN       |
| XM_013350872.1: <i>Microtus ochrogaster</i>           | --SHEF-----HSQEDKLVLDVSKSKEEDTNLKIYISHEIESSSSEVN        |
| XM_006975432.2: <i>Peromyscus maniculatus bairdii</i> | --SHEF-----HSQEDKLVLDVSKSKEEDTNLKIYISHEIESSSSEVN        |
| AJ890352.1: <i>Mesocricetus auratus</i>               | --SH-----EDKLVLDVDFKSKEDTNHLKIRISHEIESSSSEVN            |
| HQ647182.1: <i>Cricetulus barabensis</i> (partial)    | -----SH-----EDKLVLDVDFKSKEDTNHLKIRISHEIESSSSEVN         |
| XM_007638075.2: <i>Cricetulus griseus</i>             | --SH-----EDKLVLDVDFKSKEDTNHLKIRISHEIESSSSEVN            |
| NW_004504357.1: <i>Jaculus jaculus</i>                | --SQEFHHSQELHSQEVHSQEDKLVLDVDPKSREEEHLKFRISHELDSTSSSEVN |
| XM_020154612.1: <i>Castor canadensis</i>              | --SHES-----TSLEDKVPVLDPKSQQEDKHLKYRISHELDSSASSEVN       |
| XM_008830194.2: <i>Nannospalax galili</i>             | --SHEF-----HSHEDKLVLDPKSKEEDKYLKFRISHELDSSASSEVN        |



**Table S1.11: Osteopontin in Rodentia.** The available *Chinchilla lanigera* sequence possibly reflects the transcription or translation from an alternative start site. Uniquely, the *Dipodomys ordii* sequence contains a long repetitive insert. Further downstream a repetitive insert is reported only for *Cavia porcellus*.

AKHW03002540.1:Alligator mississippiensis  
NW\_017728948.1:Crocodylus porosus  
XM\_006018107.1:Alligator sinensis  
XM\_019526454.1:Gavialis gangeticus  
XM\_006135415.2:Pelodiscus sinensis  
XM\_005292014.2:Chrysemys picta bellii  
XM\_007066639.1:Chelonian mydas

```
-----MGLINSHIPGKVNITMKI AVLCLCLIGIAFALPVSKSKHQPDSRSSEERDD  
MIFICRYRTDCISGFPCSKVNITMKI AVLCLCLIGIAFALPVNKSKHQPDSRSSEERDD  
-----MTSTYMLWQKGVIMVNITMKI AVLCLCLIGIAFALPVSKSKHQPDSRSSEERDD  
-----MKI AVLCLCLIGIAFALPVSKSKHQPDSRSSEERDD  
-----MKLAVFCLCLIGMTFALPVSKSNHHAI SESSEEKHN  
-----MKI AVLCLCLISIAFALPVSKLKRHAI SESSEENHD  
-----MKI AVLCLCLISIAFALPVSKSKHHAISESSEDNHD  
** *:*****.:*****.* ::: *.***.:.:
```

AKHW03002540.1:Alligator mississippiensis  
NW\_017728948.1:Crocodylus porosus  
XM\_006018107.1:Alligator sinensis  
XM\_019526454.1:Gavialis gangeticus  
XM\_006135415.2:Pelodiscus sinensis  
XM\_005292014.2:Chrysemys picta bellii  
XM\_007066639.1:Chelonian mydas

```
SRSHHHRRHHL-RVQTESRVSPPPWAQEVHVL PQQTSFSSEESVEVPKRQIFQVA-SRSTE  
SRSHH--RHHH-HVQTESRVSPPPRAQEVHVL PQQTSFSSEESVEVPKRQIFQVA-SRSTE  
SRSHHHHRHHH-RVQTESRVSPPPWAQEVHVL PQQTSFSSEESVEVPKRQIFQVA-SRSTE  
SRSHHHHRHHH-RVQTESRVSPPPRAQEVHVL PQQTSFSSEESVEVPKRQIFQVA-SRSTE  
P-----SESASVSNE  
SRSHHSRHHHQHVHTQSRVRPAQTQEFLLVPPQDCFSDESVD-TEQQSLPEPASVSNE  
SRSHHSRHHHQVHTQSRVRPAKTQELLVPPQQSHFSSEESVENTEQQSLPKPASVSNE  
* * *
```

AKHW03002540.1:Alligator mississippiensis  
NW\_017728948.1:Crocodylus porosus  
XM\_006018107.1:Alligator sinensis  
XM\_019526454.1:Gavialis gangeticus  
XM\_006135415.2:Pelodiscus sinensis  
XM\_005292014.2:Chrysemys picta bellii  
XM\_007066639.1:Chelonian mydas

```
SE-DDHDDSDNDTDESDEDAVTDFFPTDFPVTETFPFPPTRGDNSGRGDSVGYRMRAKAK  
SE-DDQDDSDNDTDESDEDAVTDLPTDFPVTETFPFPPTRGDNSGRGDSVGYRMRAKAK  
SE-DDHDDSDNDTDESDEDAVTDFFPTDFPVTETFPFPPTRGDNSGRGDSVGYRMRAKAK  
SE-DD--DSDNDTDESDEDAVTDFFPTDFPVTETFPFPPTRGDNSGRGDSVGYRMRAKAK  
DDGDHDDSDNDTDESDEENVTDFPTDAPITTFPTPALPTRGDNSGRGDSVAYRMGAKAK  
DDGDHDDSDNDTDESDEDDVTDFTDAPVTTPLTPALPTRGDNSGRGDSVAYRMRAKAK  
DDGDHDDSDNDTDESDEDIVTYFPTDAPVTTPLTPAVPTRGDNSGRGDSVAYRMRAKAK  
. : * . :*****: ** :** ::* : * *****.*** **
```

AKHW03002540.1:Alligator mississippiensis  
NW\_017728948.1:Crocodylus porosus  
XM\_006018107.1:Alligator sinensis  
XM\_019526454.1:Gavialis gangeticus  
XM\_006135415.2:Pelodiscus sinensis  
XM\_005292014.2:Chrysemys picta bellii  
XM\_007066639.1:Chelonian mydas

```
LV-----KSSRHYQATGKFIVHDATEEGDSTPDTESQQVDYSKPLPAAHLVPGKYDISV  
LV-----KSSRHYQATGKFIVHDATEEDDSTPDTESQQVDYSKPLPAAHLVPGKYDISV  
LV-----KSSRHYQATGKFIVHDATEEGDSTPDTESQQVDYSKPLPAAHLVPGKYDISV  
LV-----KSSRHYQATGKFIVHDATEEDDSTPDAESQQVDYSKPLPAAHLVPGKYDISV  
LLEVYHKEKPSKLYKSSGKFIVYDVTEEDDSTPDIESQQVDSKRPAAHFPKSNISM  
LADVYHKEKSSKLYKAAGKFIHEVSEEDASKPETESQQVDSFKAQPAHRFPKSDISL  
LVDIYHKEKSSKLYKALGKFIVHDTVTEEDDSTPDAESQQVDSKAPCAACHFPKGFDMSM  
* * * : * : * : * : * : * : * : * : * : * : * : * : * : * : * : *
```

AKHW03002540.1:Alligator mississippiensis  
NW\_017728948.1:Crocodylus porosus  
XM\_006018107.1:Alligator sinensis  
XM\_019526454.1:Gavialis gangeticus  
XM\_006135415.2:Pelodiscus sinensis  
XM\_005292014.2:Chrysemys picta bellii  
XM\_007066639.1:Chelonian mydas

```
EWDDKSHMKDSNEVTSRSDR-----SHORLESVEVDRDSDSKPDVPEDSHMSNESREQHH  
EWDDKSHMKDSNEVTSRSDR-----SHORLESIEVDRDSDSNPDVPEDSHMSNESREQHH  
EWDDKSHMKDSNEVTSRSDR-----SHORLESVEVDRDSDSKPDVPEDSHMSNESREQRH  
EWDDKSHMKDSNEVTSRSDR-----SHORLESVEVDRDSDSNPDVPEDSHMSNESREQHH  
KLNDKKNVQGSNEVSSRSHDKSMEKDSQQQLDSVAVDSDNNSKSDVTEDSHMSNESTEQQQ  
ELDDKSNMDSNEVNSRSDRDKSMENDSQQQLDSVEADSDNSKRDVSEDSHMSNESTEQLR  
EWDDRSNIQDISEVNRSHDKSMENGSQQQLDSVEADSDNSKPDVTEDSHMSNESTEQQQ  
: : : : : . * * * : * : * : * : * : * : * : * : * : * : * : * : * : *
```

|                                                   |                                             |
|---------------------------------------------------|---------------------------------------------|
| AKHW03002540.1: <i>Alligator mississippiensis</i> | TQI-----SASVPETDADSNQTAESAEDIQDHHSLEDNEVTI  |
| NW_017728948.1: <i>Crocodylus porosus</i>         | TQI-----SASLPETDADSNQTAESVEDIQDHHSLEDNEVTI  |
| XM_006018107.1: <i>Alligator sinensis</i>         | TQI-----SASVPETDADSNQTAESAEDIQDHHSLEDNEVTI  |
| XM_019526454.1: <i>Gavialis gangeticus</i>        | TQI-----SASVPETDADSNQTAESVEDIQDHHSLEDNEVTI  |
| XM_006135415.2: <i>Pelodiscus sinensis</i>        | VQTEYLQQIDDVPEGNDNSNQTSESTEDIQDHNSIEDNEIIL  |
| XM_005292014.2: <i>Chrysemys picta bellii</i>     | AQIEDLQQVDGIPEVN-DSNQTSESTEDTQDHKSIEDNEVIL  |
| XM_007066639.1: <i>Chelonian mydas</i>            | AQTEDLQQVDVPEVN-DSNQTAESESTEDTQDHSSIEDNEVIL |
|                                                   | . * : ** : **** : ** ** * : **** : :        |

**Table S1.12: Osteopontin in Reptilia (Crocodilia and Testudines).**

XM\_015411327.1:Gecko japonicus  
XM\_020796504.1:Pogona vitticeps  
XM\_003221296.2:Anolis carolinensis  
XM\_007443523.2:Python bivittatus  
NW\_013658771.1:Thamnophis sirtalis  
XM\_015819303.1:Protobothrops mucrosquamatus  
GBEX01002350.1:Crotalus adamanteus cadam

```
MKIAVL LCLCFTTAFALPIPKKTKFHDG-AGSSEDNHSRGGHHVHKHRHHHHHS HSQSQEH  
MKIAIL LCLCLLTITFAHPVVRKSRHHDDGSM SAEGRHDSRGGHHHGHRRH--HHD SHSQEH  
MKIAIL LCLCLLTAFALPISKSRHHDD- SGSLERKHEHRHHAPHHHHR--HNNSQSHEH  
MKIAVL LCLCFTVAFALPISKSRHHDD- SRSAERKHDSREDEAYAHSH--HNNSHSHEH  
MKIAVL LCLCFTVAFALPISQSRHDHN- SMSAESKHDSKENEAAHAAAA--HHHSHSH--  
MKIAVL LCLCFTVALALPISKSTHHDD- SRSAERKHDSRENEAAH--HH--HNNSHSHEH  
MKIAVL LCLCFTVAFALPISKSTHHDD- SRSAERKHDSRENEAAHAAAA--HNNSHSHEH  
****:* :*****:* * : : * * : * * . * : * * . * * :
```

XM\_015411327.1:Gecko japonicus  
XM\_020796504.1:Pogona vitticeps  
XM\_003221296.2:Anolis carolinensis  
XM\_007443523.2:Python bivittatus  
NW\_013658771.1:Thamnophis sirtalis  
XM\_015819303.1:Protobothrops mucrosquamatus  
GBEX01002350.1:Crotalus adamanteus cadam

```
SPEHVNSHE-SQEHC-----LPSHQSSDSDESE EITEQQTLLVHPD--KSAEDDHSVDV  
SQEHSQEHVHSHESQ--EQQVSSQLSAPSS ESE EITEQQTLLVPAVASKSMEDD----D  
SREHVNSHE-SQ-----EQQVSAQLNSMSSEESDEITEQQTLLVPS--RSKEDD----H  
SHEHRNS---QESQEH---ASSQLNSQSLEDRDEITEQQTLLASS--KSHEDD----D  
-----EHSQESPEHHSQESSQLNSQSS EDRDEITEQQTLLASS--KSHEDD----D  
SQEHGNSHEHSQESPEH---ASSQLNSQSLEDRDEITEQQTLLASS--KSNEDD----D  
SQEHGNSHEHSQESPEH---ASSQLNSQSLEDRDEITEQQTLLASS--KSNEDD----D  
.: . : : ***** . : * ** .
```

XM\_015411327.1:Gecko japonicus  
XM\_020796504.1:Pogona vitticeps  
XM\_003221296.2:Anolis carolinensis  
XM\_007443523.2:Python bivittatus  
NW\_013658771.1:Thamnophis sirtalis  
XM\_015819303.1:Protobothrops mucrosquamatus  
GBEX01002350.1:Crotalus adamanteus cadam

```
DHDDVDDHDDVDDSHGEADDSDES HESDDSHQVVEVPTDRPFTPSAAPGPFTGRGDI-  
NHSDVDDD---DDHSD-SDDSDSH-----EGTVTDLPTDSPFTPPVPPDPFTGRGDSA  
DHSDVDDD---DDND--HTDSHES---DESHEVTFDFPTDAPFTLPVTPDFTGRGDSA  
DHSDANND---DHVD---SDES---DESHETVDFPTDAPFTLPVSPDPFTGRGDVA  
DHSDVSKDD---DHSDDSDSSSES---DESHETVTDAPTEAPYT----ESVTNRGDVP  
NHSDVSKDD---DHPD---SDES---DESHENFTDFPTQAPVTF----DSVTYRGDVA  
NHSDVSKDD---DHPD---SDES---DESQENFTEYPTQAPVTL----DSVTYRGDVA  
: * . . . * . * * . . : * : * * : * * . * * *
```

XM\_015411327.1:Gecko japonicus  
XM\_020796504.1:Pogona vitticeps  
XM\_003221296.2:Anolis carolinensis  
XM\_007443523.2:Python bivittatus  
NW\_013658771.1:Thamnophis sirtalis  
XM\_015819303.1:Protobothrops mucrosquamatus  
GBEX01002350.1:Crotalus adamanteus cadam

```
PYGIQHGO---LKF LRSKKSSEQFDSHDTTQEDDSLDPVDSHETHSSKAVSHESQDTS  
PNGIRAKVDLVHFKK---SYKKSQKGFDSHDVTD DFDSTPDVESHE SYSSKAHSLSHDTS  
PYGLKSRVDLVHFEKSKKVKYKKSQKGFDSHDVTD DFDSPDPVESHE SYSSKAHSTESHDT  
PYGIRAKLDRMSLGKSGKAHKKSGKGFDSQDFSDEVDSTPDEDSHEY--SKARSLESHDTS  
SDEFRPNVDFMSLGRS-----GKFDSQSVSDEVDSTPDDSHED--SKARSLESHE--  
PYGF GAKDDQMSLERS-----GKFDSQDVSDEVDSTPDDSHHEY--AKARSLESHE--  
PYGFRAKDDQMSLERS-----GKFDSQDVSDEVDSTPDDSHREY--AKARSLESHE--  
: : : * * . : : * * * * : * * : * * * * * :
```

XM\_015411327.1:Gecko japonicus  
XM\_020796504.1:Pogona vitticeps  
XM\_003221296.2:Anolis carolinensis  
XM\_007443523.2:Python bivittatus  
NW\_013658771.1:Thamnophis sirtalis  
XM\_015819303.1:Protobothrops mucrosquamatus  
GBEX01002350.1:Crotalus adamanteus cadam

```
TESEDKSNLQDSNEVHSASHDKSVENDSRQKLDVSEEDH-----DNSKADISQESDGIDH  
VE---SDLRESNEVHSTSHDRSLERASQOTLESVEDDQDDADHDNSKITASLESHE---  
VEKDDASHLRDSNEVLRASRDKSLENNSRQKLESAYLHDDADHDN IKLAIALASHE---  
VERVDKSNLRDSNEVHSASHERSLEDNSQEKPEVEDS-----HDNSKVTISLESTE---  
--SDDKSDLTDSNEVHSASHDISLEDHSPEKPEVEDS-----SDHKSASLSLESTE---  
--GDDKSNLRDSNEVHSASHDTSLEDHSPEKAESVEDS-----HDHKSQSVSLESTE---  
--RDDKSNLRDSNEVHSASHDTSLEDHSPEKPEVEDS-----HDHKSQSVSLESTE---  
* . : * * * : * : * * * * . : * * : * * .
```

```

XM_015411327.1:Gecko japonicus      ITELKARERGEPEADHDHDVDND-----
XM_020796504.1:Pogona vitticeps     STELQKDYHDGLQQVAHDRSIDDVSNQILESTEDHHSVEDRHS AEDKHSVEDH-SIENHH
XM_003221296.2:Anolis carolinensis  SREYLKDRSVELRQVDHHDVDVDSNQSLENVEDHHSVEDHHSVEDHHSIEDHHSVEDKH
XM_007443523.2:Python bivittatus    SREEKKDRSEELQQLP--DVDDVSNQILESTESHHSVEDHHS AEDHHS AEDHHS AEDHH
NW_013658771.1:Thamnophis sirtalis  SREQKDHSEEPQQLDS--NPDDASNQIVESAESQHSS-----
XM_015819303.1:Protobothrops mucrosquamatus  SGEQKDHSEELQQLDS--NPDDVSNQILESAENHHS A-----
GBEX01002350.1:Crotalus adamanteus cadam  SGEQKDHSEELQQLDS--NPDDVSNQILESTENHHS T-----
          * *      : :      . * :      : **

```

```

XM_015411327.1:Gecko japonicus      -----HHSVED-----NEIEY
XM_020796504.1:Pogona vitticeps     SVEN-----HSTEDHHSVEDHHSIEDNEVIL
XM_003221296.2:Anolis carolinensis  SVEDKHSVEDHHSIEHPLSVEDHHSVEDHHSIEDNEVIL
XM_007443523.2:Python bivittatus    -----EDHHSAEHHSVEDNEVIL
NW_013658771.1:Thamnophis sirtalis  -----EDHHSVEHHSVEDNEVIL
XM_015819303.1:Protobothrops mucrosquamatus  -----EDHHSVEHHSVEDNEVIL
GBEX01002350.1:Crotalus adamanteus cadam  -----EDHHSVEHHSVEDNEVIL

```

**Table S1.13: Osteopontin in Reptilia (Squamata).**









|                                                |                                  |        |       |                         |                   |
|------------------------------------------------|----------------------------------|--------|-------|-------------------------|-------------------|
| M59182.1:Gallus                                | ---HVVKASKLRKAARKLI              | EDDATA | ----  | EVGDSQLAGL              | -----             |
| XM_003205565.3:Meleagris gallopavo             | ---HMVKASKLRKTARKLI              | EDDATA | ----  | EAGGSQLAGL              | -----             |
| XM_021395699.1:Numida meleagris                | ---HVVKASKLRKVKARKLI             | EDDATE | ----  | EVGDSQPVLG              | -----             |
| NM_001323234.1:Coturnix japonica               | ---HVVKASKLRKAARKLI              | EDDAT  | ----  | EDGDSQPAGL              | -----             |
| XM_010218705.1:Tinamus guttatus                | ---AVMKPSKLRKAARKLMVHDVTEE       |        |       | DLSALAADSHQEGFSREAFG    | AHRSAEKYADSL      |
| XM_009676586.1:Struthio camelus australis      | ---LVVKPSKLRKAARKLIVHDATEE       |        |       | DESALAADSRQAGLSREDLG    | AHRSAGKYADSG      |
| XM_013957376.1:Apteryx australis mantelli      | ---TVVKSSKLRKAARKLIVHDATEE       |        |       | DESALVTDSSHQAGLSQEDLG   | ARHLGAGKYADSG     |
| XM_021526515.1:Lonchura striata domestica      | ---ALLKYIKFHKDAKKLI              | YDATEE |       | DESMDADSQR-PLSRENEFA    | FRRSLTKPASSV      |
| XM_002190366.1:Taeniopygia guttata             | ---ALLKYIKFHKDAKKLI              | YDATEE |       | DESMDADSQR-SLSRENEFA    | FRRSLTKPSSSV      |
| NW_008240042.1:Corvus brachyrhynchos           | ---ALLKSIKLYKAAKKLI              | YGATEE |       | DESMDADSQR-SVSREDSA     | SRRSLRKHASSV      |
| XM_010412044.2:Corvus cornix cornix            | ---ALLKSIKLYKAAKKLI              | YGATEE |       | DESMDADSQR-SVSREDSA     | SRRSLRKHASSV      |
| XM_015623543.2:Parus major                     | ---TLKSIKLRKAARKLI               | YDATEE |       | DESYMDADSQR-SVSREDSA    | SRRSLRKHASS-      |
| XM_005525626.2:Pseudopodoces humilis           | ---TLKSIKLRKAARKLI               | YDATEE |       | DESYMDADSQR-SVSREDSA    | SRRSLRKHASS-      |
| XM_014878941.1:Sturnus vulgaris                | AKAALLKSVKLRKAARKLI              | YDATEE |       | DESMDADSQR-SVSREDDAA    | PRRSLRKKHARSV     |
| XM_016297843.1:Ficedula albicollis             | AKAKLLKSVKLRKAARKLI              | YDATEE |       | DESMDADSQR-SVSREDSA     | SRRSLRKHASSV      |
| NW_007931124.1:Serinus canaria                 | ---ALLKSIKLRKAARKLI              | YDATEE |       | DESMDADSQR-SVSREDSA     | SRRSLRKHASSM      |
| XM_005418195.1:Geospiza fortis                 | ---ALLKSIKLRKAARKLI              | YDATEE |       | DESMDADSQR-SVSREDSA     | SRRSLRKHASSV      |
| XM_005485296.1:Zonotrichia albicollis          | ---ALLKSIKLRKAARKLI              | YDATEE |       | DESMDADSQR-SVSREDDAA    | SRRSLRKHASSV      |
| XM_009904975.1:Picoides pubescens              | ---RLKSSKLRKAARKLQKHCKATRSNQTAES | EQARD  | ----- | RLS                     | SIERNEVTL         |
| XM_005012779.3:Anas platyrhynchos              | ---SMVKSSKLRKAARKLIADDATEE       |        |       | DESALPGDSQQVGLWQELLA    | AHRAPGKRAVSG      |
| XM_013190510.1:Anser cygnoides domesticus      | ---SMVKSSKLRKAARKLIADDATEE       |        |       | DESALHGDSQQVGLWQELLA    | AHRAPGKRAVSG      |
| KZ506572.1:Limosa lapponica baueri             | ---AVVKSSKLRKAARKLIVDASED        |        |       | GESALDAGSQAGLSQEGMA     | ARRSLGKHVISG      |
| XM_005498492.2:Columba livia                   | ---TVVKSSKLRKAARKQVIAYDTKEE      |        |       | DESALDADSQRGRLSQEDLS    | ARRSLGKLSITG      |
| LSYS01006159.1:Patagioenas fasciata monilis    | ---TVVKSSKLRKAARKQVIVYDTEE       |        |       | DESALDADSQRGHLSREDLS    | ARRSLGKLSITG      |
| XM_008500834.1:Calypte anna                    | ---TALQSSKLRKAARKLIVYDATEE       |        |       | DESALDADSQRGHLSQEGFY    | ---VLGKHTVSE      |
| XM_009993754.1:Chaetura pelagica               | ---VALKSSKHLKAARKLVVGEDSEE       |        |       | DESLEAASQQAELSQEARA     | QGFPRKHGIRG       |
| XM_008942236.1:Merops nubicus                  | ---TVVRSKLRKAARKQLGYDTAEE        |        |       | DESALDADSQQAGLPGWGAFA   | ARRSLGKHDISG      |
| XM_010019624.1:Nestor notabilis                | ---TVVKSSKLRKAARKLIAYDATEE       |        |       | DESALDADSQQVGLSQEHFA    | AHRSLVK-HISR      |
| XM_005146580.1:Melospittacus undulatus         | ---TVVKSSKLRKAARKLIAYDATEE       |        |       | DESALDADSQQVGLSQEHFA    | AHRSLVK-HISR      |
| XM_009559526.1:Cuculus canorus                 | ---IVMKASKLRKHPAKKLTIVHDATEE     |        |       | NNSALDADSQQ-GLSQEDSA    | SDRSLGHTHTIIG     |
| XM_005444503.1:Falco cherrug                   | ---TVKSSKLRKAARKLIAYDATEE        |        |       | DESVPDADSQQAGLSQEDSA    | TRHSLGKHTVSG      |
| XM_005233595.1:Falco peregrinus                | ---TVKSSKLRKAARKLIAYDATEE        |        |       | DESVPDADSQQAGLSQEDSA    | TRHSLGKHTVSG      |
| XM_009073853.1:Acanthisitta chloris            | ---ALVKAIKLRKAARKLIVYDATEE       |        |       | DESALDADSQQAGLSQEDSA    | SRRSLGKHASSM      |
| XM_008930247.2:Manacus vitellinus              | ---ALVKSIKLRKDAKKVM              | YDATEE |       | DESALDADSQRAGFSREDSA    | SRRSLEKHAISV      |
| NW_016690259.1:Lepidothrix coronata            | ---ALVKSIKLRKDAKKVM              | YDATEE |       | DESALDADSQRAGFSREDSA    | SRRSLEKHAISV      |
| XM_010202192.1:Colius striatus                 | ---TVVKSSKLRKAARKLIAYDATEE       |        |       | DVSLDADSQQAGSQ-EGH      | AALRSLGKHGISG     |
| XM_010173470.1:Caprimulgus carolinensis        | ---AMVKASKLRKAARKLIVYDATEE       |        |       | DESALDADSQQAGLSQEDFA    | VRRALGK-YISG      |
| XM_010181850.1:Mesitornis unicolor             | ---TLVKSSKLRKAARKLIVYDATEE       |        |       | DESALDADSQQAGLSWEDSA    | AHRSLGKHISG       |
| XM_009868641.1:Apaloderma vittatum             | ---TAVKSSKLRKAPKPKLI             | YDATEE |       | DESALDADSQRARSLE        | ---VPAARVSLGKHISG |
| XM_009958978.1:Leptosomus discolor             | ---TMVSSKLRKAARKLIAHDATEE        |        |       | DEGALDADSQQVGLAQEDLA    | APRSLGKHAISR      |
| XM_010079868.1:Ptarmicon gutturalis            | ---AVKASKLRKAARKLIVYDATEE        |        |       | DESALDADSQQQAI-SR       | EAVARRSLGKHTLSG   |
| XM_010119303.1:Chlamydotis macqueenii          | ---ALVKAIKLRKAARKLIAYDATEE       |        |       | DESALDADSQQAGLSQEDFA    | VRRTLGKHTISR      |
| XM_009970430.1:Tyto alba                       | ---TVVKSSKLRKAARKQVIEYDATEE      |        |       | DESALDADSQQAGLSQEHFA    | ARRSLGKHAISG      |
| XM_009932280.1:Opisthocomus hoazin             | ---TAVKSSKLRKAARKLIVYDATEE       |        |       | DESALDADSQQAGLSWEDFA    | ARRSLGKHAISG      |
| XM_010145609.1:Buceros rhinoceros silvestris   | ---AVLKSSKLRKAARKLIAYDATGE       |        |       | D-----DADSQQAGLSREDA    | VHSLGKHTISG       |
| XM_009978083.1:Tauraco erythrolophus           | ---AVVKSSKLRKAARKLIVYDATEE       |        |       | DESALDADSQQAGLSQEDFA    | ARRSLRKHAVSG      |
| XM_010154680.1:Eurypyga helias                 | ---TAVKASKLRKVAKKLILYDATNE       |        |       | DEGLDADSQQAGLSQEDSAAAHL | LSLAKHAISR        |
| XM_009639993.1:Egretta garzetta                | ---AVVKPSKLRKAARKLIVYDATEE       |        |       | DESALDADSQQAGLSQEDFA    | AYRSLGKQAISR      |
| XM_009327481.1:Pygoscelis adeliae              | ---TVVKSSKLRKAARKLIVYDATEE       |        |       | DESALDADSQQAGLSQEDFA    | ACRSLGKHAISG      |
| XM_009280227.1:Aptenodytes forsteri            | ---TVVKPSKLRKAARKLIVYDATEE       |        |       | DESALDADSQQAGLSREDF     | ACRSLGKHAISR      |
| XM_009512482.1:Phalacrocorax carbo             | ---TVVKSSKLRKAPKPKLIVYDATEE      |        |       | DESALDADSQQAGLSQEDFA    | AHRSLGKHPISG      |
| XM_014961493.1:Calidris pugnax                 | ---AVVKSRKLRKAARKLIVYDASED       |        |       | DESALDADSQQAGLSWEDFA    | ARRSLGKHAISG      |
| XM_009813620.1:Gavial stellata                 | ---SVVKSNKLRKAARKLIEYDATEE       |        |       | DESALDADSQQAGLSREDA     | VRRSLGKHAISG      |
| XM_009916485.1:Haliaeetus albicilla            | ---TVVSSKLRKAARKLIVYDASEE        |        |       | DESALDAHSQQTGLSRE       | -----KHAISR       |
| XM_010569846.1:Haliaeetus leucocephalus        | ---TVVSSKLRKAARKLIVYDASEE        |        |       | DESALDAHSQQTGLSRE       | -----KHAISR       |
| XM_011600806.1:Aquila chrysaetos canadensis    | ---TVVESRKLKAARKLIVYDASEE        |        |       | DESALDADSQQQTGLSREDF    | AHSLGKHAISR       |
| XM_009490811.1:Pelecanus crispus               | ---TVVKSSKLRKAARKLIVYDATEE       |        |       | DESALDADSQQAGLSQEDFA    | AHRSLEKHAISG      |
| XM_009694723.1:Carriama cristata               | ---TVVKSSKLRKAARKLIVYDASEE       |        |       | DESALDADSQQAGLSQEDSA    | VRRSLGKHAISR      |
| XM_010311221.1:Balearica regulorum gibbericeps | ---AMVKSSKLRKAARKLIVYDTTEE       |        |       | DESALDADSQQAGLSREDF     | ARRSLGKHAISR      |
| XM_010287426.1:Phaethon lepturus               | ---TVVKPSKLRKAARKLIVYDPTTE       |        |       | DESALDADSQQAGLSREDF     | AHRSLGKHTISE      |
| XM_009890748.1:Charadrius vociferus            | ---AVVKPSKLRKAARKLIVYDATEE       |        |       | DDSALDADSQQAGLSWEDFA    | ARRSLGKHAISG      |
| XM_009584852.1:Fulmarus glacialis              | ---TVVKSSKLRKAARKLIVYDATEE       |        |       | DKSALDADSQQAGLSREDF     | AHSLGKHAISG       |
| XM_009467655.1:Nipponia nippon                 | ---TMVKSSKLRKAARKLIVYDATEE       |        |       | DESALDADSQQAGLSREDF     | AHRSLGKHAISR      |

|                                                |                                                                |
|------------------------------------------------|----------------------------------------------------------------|
| M59182.1:Gallus                                | WLPKESREQ---DSRELAQHQSVENDSRPF--DSPEVGGGD-SKASAG-----          |
| XM_003205565.3:Meleagris gallopavo             | WWPKESREQ---DSRELTOHQSVENDSRPF--DSPEVDGGD-SKASAG-----          |
| XM_021395699.1:Numida meleagris                | WWPKESREQ---ESRELAQHQSVENDSRPF--DSREVDGGD-SKASAG-----          |
| NM_001323234.1:Coturnix japonica               | WWPKESREQ---NSRELPOHQSVENDSRPF--DSREVDGGD-SKASAG-----          |
| XM_010218705.1:Tinamus guttatus                | EWGDKSHGHDSNEVGRKLPERSLEKDSRQKF--DSPERD--S-GEWGARGDPPPS----    |
| XM_009676586.1:Struthio camelus australis      | EWDRKSRGQDSDEVVRKVPDRSLENDSRQKL--DSLAEAVGD-SR-----             |
| XM_013957376.1:Apteryx australis mantelli      | EWGHKSRGRQDSNEVVRKLPDWSVENDSRQKF--DSPEVERDS-SERGARGGIPLS----   |
| XM_021526515.1:Lonchura striata domestica      | VWSDSHGRDSEQDSSEPHRSLENDNSWPKS--DSREAQSDS-SKPGVVRDSDHPSVESR    |
| XM_002190366.1:Taeniopygia guttata             | VWSDSHGRDSEQDSSEPHRSLENDNSWPKS--DSHEAQSDS-SKWFHP--SSMPFLPAQ    |
| NW_008240042.1:Corvus brachyrhynchos           | VWSDSHGRDSEQDSSEPHRSLENDNSWPKS--DSHEAQSDS-SKSGVVRDSDHPSVESR    |
| XM_010412044.2:Corvus cornix cornix            | VWSDSHGRDSEQDSSEPHRSLENDNSWPKS--DSHEAQSDS-SKSGVVRDSDHPSVESR    |
| XM_015623543.2:Parus major                     | VWADSHGRDSEQDSSEPHRSLENDNSWPKS--ASHEAQSDS-SKSGVVRDSDHPSVESR    |
| XM_005525626.2:Pseudopodoces humilis           | VWSESHGRDSEQDSSEPHRSLENDNSWPKS--ASHEAQSDS-SKSGVVRDSDHPSVESR    |
| XM_014878941.1:Sturnus vulgaris                | AWSDSHGRDSEQDSSEPHRSLENDNSWPKS--DSHEAQSDS-SKSGVVRDSDHPSVESR    |
| XM_016297843.1:Ficedula albicollis             | AWSDSHGRDSEQDSSEPHRSLENDNSWPKS--DSHEAQSDS-SKSGVVRDSDHPSVESR    |
| NW_007931124.1:Serinus canaria                 | VWSDSHGRDSEQDSSEPHRSLENDNSWPKS--HE--AEQDS-SESGIRGDSHPSVESR     |
| XM_005418195.1:Geospiza fortis                 | VWSDSHGRDSEQDSSEPHRSLENDNSWPKS--DSHEAQSDS-SKPGM-----           |
| XM_005485296.1:Zonotrichia albicollis          | VWSDSHGRDSEQDSSEPHRSLENDNSWPKS--DSHEAQSDS-SKSGM-----           |
| XM_009904975.1:Picoides pubescens              | EWLDKSHERDRSKEELTS---HQS MENDSRQKF--DSPEVEGGD-SRDGVRD-DHLS     |
| XM_005012779.3:Anas platyrhynchos              | EWLDKSHERDRSKEELTS---HQS MENDSRQKF--DSPEVEGGD-SQDQARGDGRHS---- |
| XM_013190510.1:Anser cygnoides domesticus      | EWADKSHGQDSSELDKQHDQSTENDSRQKF--DSHEAQSDS-SKVSIRGDSHQSS----    |
| KZ506572.1:Limosa lapponica baueri             | EWAAKSHRQDSSELDKQHDQSTENDSRQKF--DSHEAQSDS-SKVSIRGDSHQSS----    |
| XM_005498492.2:Columba livia                   | EWAAKSHRQDSSELDKQHDQSTENDSRQKF--DSHEAQSDS-SKVSIRGDSHQSS----    |
| LSYS01006159.1:Patagioenas fasciata monilis    | KWAAKSHGQDSSELDKQHDQSTENDSRQKF--DSHEAQSDS-SKVSIRGDSHQSS----    |
| XM_008500834.1:Calypte anna                    | EWADKSHGQDSSELDKQHDQSTENDSRQKF--DSHEAQSDS-SKVSIRGDSHQSS----    |
| XM_009993754.1:Chaetura pelagica               | EWADRSHQDSSELDKQHDQSTENDSRQKF--NSHEVEADG-SKFGARWDSHQSS----     |
| XM_008942236.1:Merops nubicus                  | EWADKSHGQDSSELDKQHDQSTENDSRQKF--DSHEAQSDS-SKVSIRGDSHQSS----    |
| XM_010019624.1:Nestor notabilis                | EWADKSHGQDSSELDKQHDQSTENDSRQKF--DSHEAQSDS-SKVSIRGDSHQSS----    |
| XM_005146580.1:Melospitta undulatus            | EWADKSHGQDSSELDKQHDQSTENDSRQKF--DSHEAQSDS-SKVSIRGDSHQSS----    |
| XM_009559526.1:Cuculus canorus                 | EWADKSHGQDSSELDKQHDQSTENDSRQKF--DSHEAQSDS-SKVSIRGDSHQSS----    |
| XM_005444503.1:Falco cherrug                   | EWADKSHGQDSSELDKQHDQSTENDSRQKF--DSHEAQSDS-SKVSIRGDSHQSS----    |
| XM_005233595.1:Falco peregrinus                | EWADKSHGQDSSELDKQHDQSTENDSRQKF--DSHEAQSDS-SKVSIRGDSHQSS----    |
| XM_009073853.1:Acanthisitta chloris            | EWSDKSHGQDSSELDKQHDQSTENDSRQKF--DRHEAQSDS-SKSAVRGDSHFSS----    |
| XM_008930247.2:Manacus vitellinus              | EWSDKSHGQDSSELDKQHDQSTENDSRQKF--DSHEAQSDS-SKVSIRGDSHQSS----    |
| NW_016690259.1:Lepidothrix coronata            | EWSDKSHGQDSSELDKQHDQSTENDSRQKF--DSHEAQSDS-SKVSIRGDSHQSS----    |
| XM_010202192.1:Colius striatus                 | EWADKSHGQDSSELDKQHDQSTENDSRQKF--DSHEAQSDS-SKVSIRGDSHQSS----    |
| XM_010173470.1:Caprimulgus carolinensis        | EWSDKSHGQDSSELDKQHDQSTENDSRQKF--DSHEAQSDS-SKVSIRGDSHQSS----    |
| XM_010181850.1:Mesitornis unicolor             | KWADKSHGQDSSELDKQHDQSTENDSRQKF--DSHEAQSDS-SKVSIRGDSHQSS----    |
| XM_009868641.1:Apaloderma vittatum             | EWADKSHGQDSSELDKQHDQSTENDSRQKF--DSHEAQSDS-SKVSIRGDSHQSS----    |
| XM_009958978.1:Leptosomus discolor             | EWADKSHRQDSSELDKQHDQSTENDSRQKF--DSHEAQSDS-SKVSIRGDSHQSS----    |
| XM_010079868.1:Pterocles gutturalis            | EWADKSHGQDSSELDKQHDQSTENDSRQKL--DSHEAQSDS-SKVSIRGDSHQSS----    |
| XM_010119303.1:Chlamydotis macqueenii          | EWADKSHGQDSSELDKQHDQSTENDSRQKF--DSHEAQSDS-SKVSIRGDSHQSS----    |
| XM_009970430.1:Tyto alba                       | EWADKSHGQDSSELDKQHDQSTENDSRQKF--DSHEAQSDS-SKVSIRGDSHQSS----    |
| XM_009932280.1:Opisthocomus hoazin             | EWADKSHRQDSSELDKQHDQSTENDSRQKF--DSHEAQSDS-SKVSIRGDSHQSS----    |
| XM_010145609.1:Buceros rhinoceros silvestris   | EWADKSHGQDSSELDKQHDQSTENDSRQKF--DSHEAQSDS-SKVSIRGDSHQSS----    |
| XM_009978083.1:Tauraco erythrolophus           | EWADKSHRQDSSELDKQHDQSTENDSRQKF--DSHEAQSDS-SKVSIRGDSHQSS----    |
| XM_010154680.1:Eurypyga helias                 | EWADKSHRQDSSELDKQHDQSTENDSRQKF--DSHEAQSDS-SKVSIRGDSHQSS----    |
| XM_009639993.1:Egretta garzetta                | EWADKSHGQDSSELDKQHDQSTENDSRQKL--DSHEAQSDS-SKVSIRGDSHQSS----    |
| XM_009327481.1:Pygoscelis adeliae              | EWADKSHGQDSSELDKQHDQSTENDSRQKL--DSHEAQSDS-SKVSIRGDSHQSS----    |
| XM_009280227.1:Aptenodytes forsteri            | EWADKSHGQDSSELDKQHDQSTENDSRQKL--DSHEAQSDS-SKVSIRGDSHQSS----    |
| XM_009512482.1:Phalacrocorax carbo             | EWADKSHRQDSSELDKQHDQSTENDSRQKF--DSHEAQSDS-SKVSIRGDSHQSS----    |
| XM_014961493.1:Calidris pugnax                 | EWADKSHGQDSSELDKQHDQSTENDSRQKF--DSHEAQSDS-SKVSIRGDSHQSS----    |
| XM_009813620.1:Gavia stellata                  | EWADKSHGQDSSELDKQHDQSTENDSRQKF--DSHEAQSDS-SKVSIRGDSHQSS----    |
| XM_009916485.1:Haliaeetus albicilla            | EWADKSHGQDSSELDKQHDQSTENDSRQKF--DSHEAQSDS-SKVSIRGDSHQSS----    |
| XM_010569846.1:Haliaeetus leucocephalus        | EWADKSHGQDSSELDKQHDQSTENDSRQKF--DSHEAQSDS-SKVSIRGDSHQSS----    |
| XM_011600806.1:Aquila chrysaetos canadensis    | EWADKSHGQDSSELDKQHDQSTENDSRQKF--DSHEAQSDS-SKVSIRGDSHQSS----    |
| XM_009490811.1:Pelecanus crispus               | EWADKSHGQDSSELDKQHDQSTENDSRQKF--NSHEVEADD-SKAGVRGDSHQSS----    |
| XM_009694723.1:Carriama cristata               | EWADKSHGRDSEQDSSEPHRSLENDNSWPKS--DSHEAQSDS-SKVSIRGDSHQSS----   |
| XM_010311221.1:Balearica regulorum gibbericeps | EWADKSHRQDSSELDKQHDQSTENDSRQKL--DSHEAQSDS-SKVSIRGDSHQSS----    |
| XM_010287426.1:Phaethon lepturus               | EWADKSHRQDSSELDKQHDQSTENDSRQKL--DSHEAQSDS-SKVSIRGDSHQSS----    |
| XM_009890748.1:Charadrius vociferus            | EWADKSHGQDSSELDKQHDQSTENDSRQKF--DSHEAQSDS-SKVSIRGDSHQSS----    |
| XM_009584852.1:Fulmarus glacialis              | EWADKSHGQDSSELDKQHDQSTENDSRQKF--DSHEAQSDS-SKVSIRGDSHQSS----    |
| XM_009467655.1:Nipponia nippon                 | EWADKSHGQDSSELDKQHDQSTENDSRQKF--DSHEAQSDS-SKVSIRGDSHQSS----    |

|                                                |                                                                  |
|------------------------------------------------|------------------------------------------------------------------|
| M59182.1:Gallus                                | -----                                                            |
| XM_003205565.3:Meleagris gallopavo             | -----                                                            |
| XM_021395699.1:Numida meleagris                | -----                                                            |
| NM_001323234.1:Coturnix japonica               | -----                                                            |
|                                                |                                                                  |
| XM_010218705.1:Tinamus guttatus                | -----                                                            |
| XM_009676586.1:Struthio camelus australis      | -----                                                            |
| XM_013957376.1:Apteryx australis mantelli      | -----                                                            |
|                                                |                                                                  |
| XM_021526515.1:Lonchura striata domestica      | ERGDSHPSVE-----SRERGDSHPSVESRERGDSHPSES                          |
| XM_002190366.1:Taeniopygia guttata             | KKNM-----                                                        |
| NW_008240042.1:Corvus brachyrhynchos           | E-----RGDSHPSES                                                  |
| XM_010412044.2:Corvus cornix cornix            | E-----RGDSHPSES                                                  |
| XM_015623543.2:Parus major                     | E-----REDSHPS---                                                 |
| XM_005525626.2:Pseudopodoces humilis           | E-----RGDSHPS---                                                 |
| XM_014878941.1:Sturnus vulgaris                | -----                                                            |
| XM_016297843.1:Ficedula albicollis             | E-----RGDSHPS---                                                 |
| NW_007931124.1:Serinus canaria                 | EKGDSLSSVESRERGDLSLSSVESREKGDLSLSSVESREKGDLSLSSVESREKGDLSLSSVESR |
| XM_005418195.1:Geospiza fortis                 | -----RGDNLSSVESR                                                 |
| XM_005485296.1:Zonotrichia albicollis          | -----RGDSLSSVESR                                                 |
|                                                |                                                                  |
| XM_009904975.1:Picoides pubescens              | -----                                                            |
| XM_005012779.3:Anas platyrhynchos              | -----                                                            |
| XM_013190510.1:Anser cygnoides domesticus      | -----                                                            |
| KZ506572.1:Limosa lapponica baueri             | -----                                                            |
| XM_005498492.2:Columba livia                   | -----                                                            |
| LSYS01006159.1:Patagioenas fasciata monilis    | -----                                                            |
| XM_008500834.1:Calypte anna                    | -----                                                            |
| XM_009993754.1:Chaetura pelagica               | -----                                                            |
| XM_008942236.1:Merops nubicus                  | -----                                                            |
| XM_010019624.1:Nestor notabilis                | -----                                                            |
| XM_005146580.1:Melopsittacus undulatus         | -----                                                            |
| XM_009559526.1:Cuculus canorus                 | -----                                                            |
| XM_005444503.1:Falco cherrug                   | -----                                                            |
| XM_005233595.1:Falco peregrinus                | -----                                                            |
| XM_009073853.1:Acanthisitta chloris            | -----                                                            |
| XM_008930247.2:Manacus vitellinus              | -----                                                            |
| NW_016690259.1:Lepidothrix coronata            | -----                                                            |
| XM_010202192.1:Colius striatus                 | -----                                                            |
| XM_010173470.1:Caprimulgus carolinensis        | -----                                                            |
| XM_010181850.1:Mesitornis unicolor             | -----                                                            |
| XM_009868641.1:Apaloderma vittatum             | -----                                                            |
| XM_009958978.1:Leptosomus discolor             | -----                                                            |
| XM_010079868.1:Pterocles gutturalis            | -----                                                            |
| XM_010119303.1:Chlamydotis macqueenii          | -----                                                            |
| XM_009970430.1:Tyto alba                       | -----                                                            |
| XM_009932280.1:Opisthocomus hoazin             | -----                                                            |
| XM_010145609.1:Buceros rhinoceros silvestris   | -----                                                            |
| XM_009978083.1:Tauraco erythrolophus           | -----                                                            |
| XM_010154680.1:Eurypyga helias                 | -----                                                            |
| XM_009639993.1:Egretta garzetta                | -----                                                            |
| XM_009327481.1:Pygoscelis adeliae              | -----                                                            |
| XM_009280227.1:Aptenodytes forsteri            | -----                                                            |
| XM_009512482.1:Phalacrocorax carbo             | -----                                                            |
| XM_014961493.1:Calidris pugnax                 | -----                                                            |
| XM_009813620.1:Gavial stellata                 | -----                                                            |
| XM_009916485.1:Haliaeetus albicilla            | -----                                                            |
| XM_010569846.1:Haliaeetus leucocephalus        | -----                                                            |
| XM_011600806.1:Aquila chrysaetos canadensis    | -----                                                            |
| XM_009490811.1:Pelecanus crispus               | -----                                                            |
| XM_009694723.1:Cariama cristata                | -----                                                            |
| XM_010311221.1:Balearica regulorum gibbericeps | -----                                                            |
| XM_010287426.1:Phaethon lepturus               | -----                                                            |
| XM_009890748.1:Charadrius vociferus            | -----                                                            |
| XM_009584852.1:Fulmarus glacialis              | -----                                                            |
| XM_009467655.1:Nipponia nippon                 | -----                                                            |

|                                                |                                                           |
|------------------------------------------------|-----------------------------------------------------------|
| M59182.1:Gallus                                | -----VDSRESL--ASR---SAVDTSNQTLESAEDAEDRHSIENNEVTR         |
| XM_003205565.3:Meleagris gallopavo             | -----VDSRESQ--GSV---PAVDTSNQTLESAEDAEDRHSIENNEVTR         |
| XM_021395699.1:Numida meleagris                | -----VDSRESQ--GSV---PAVDTSNQTLESAEDAEDRHSIENNEVTR         |
| NM_001323234.1:Coturnix japonica               | -----VDSRESQ--GSV---PAVDASNQTLESAEDAEDRHSIENNEVTR         |
| XM_010218705.1:Tinamus guttatus                | -----RESRESQARVSAE-VPDGDNSNQTLESAEDAQDHLSEIKHNEVIF        |
| XM_009676586.1:Struthio camelus australis      | -----RESRESQARVSAE-VPDGDNSNQTLESAEDAQDHLSEIKHNEVIF        |
| XM_013957376.1:Apteryx australis mantelli      | -----RESRESPAHVLRTRVIVVDNSNQTLESAEDAQDLRSIKHNEVAL         |
| XM_021526515.1:Lonchura striata domestica      | ERGDSHPSVESRESR--DRVSAELADDISSQTLESAEDSQDRHSIESNEVTL      |
| XM_002190366.1:Taeniopygia guttata             | -----ERGDSHPSAESRESQ--DRVSAELSDDISNQTLESAEDSQDRRSIESNEVTL |
| NW_008240042.1:Corvus brachyrhynchos           | ESRDHSHPSAESRESQ--DRVSAELSDDISNQTLESAEDSQDRRSIESNEVTL     |
| XM_010412044.2:Corvus cornix cornix            | ESRDHSHPSAESRESQ--DRVSAELSDDISNQTLESAEDSQDRRSIESNEVTL     |
| XM_015623543.2:Parus major                     | -----VESRESR--DRVSAELSDGISNQTLESAEDSQDRHSIESNEVTL         |
| XM_005525626.2:Pseudopodoces humilis           | -----VESRESR--DRVSAELSDGISNQTLESAEDSQDRHSIESNEVTL         |
| XM_014878941.1:Sturnus vulgaris                | -----GVESR--DRVSEELSDDISNQTLESAEDSQDRHSIESNEVTL           |
| XM_016297843.1:Ficedula albicollis             | -----VESRESR--DRVSAELSDDISNQTLESAEDSQDRHSIESNEVTL         |
| NW_007931124.1:Serinus canaria                 | ERGDHSHPSVESRESR--DRVSAELSDDIITQTLENAEDSQDRHSIESNEVTL     |
| XM_005418195.1:Geospiza fortis                 | ERGDHSHPSVESRESR--DRVSAELSDHISIQTLESAEDSQDRHSIESNEVTL     |
| XM_005485296.1:Zonotrichia albicollis          | E---SHLSVESRERF--DSHSTELSDHISIQKLESAEDSQDRHSIESNEVTL      |
| XM_009904975.1:Picoides pubescens              | -----MESRERRRVSAAGIPADDTSNQTLESAENTQEHHSIENNEVTI          |
| XM_005012779.3:Anas platyrhynchos              | -----LESRERRRVSAAGSIPITDDTSNQTLESAENAREHHSIENNEVTI        |
| XM_013190510.1:Anser cygnoides domesticus      | -----MESRESQ--VRSVAENTNDNSNQTLESAEDAQDHHHSIENNEVTL        |
| KZ506572.1:Limosa lapponica baueri             | -----AESRESQ--ARILPEIPDEDSNQTLESAEDAQDRHSIENNEVTL         |
| XM_005498492.2:Columba livia                   | -----VESRESQ--ARVLPPEIPDDNSNQTLESAEDAQDRHSIENNEVTL        |
| LSYS01006159.1:Patagioenas fasciata monilis    | -----MESKESQ--VQVPAEVPDDNSNQTLESAEDAQDRHSIENNEVTI         |
| XM_008500834.1:Calypste anna                   | -----RESRESF---PAGIPEDNSTQTLESAEDAQDHHHSIDTNEVTL          |
| XM_009993754.1:Chaetura pelagica               | -----LESRESQ--VRSVAEIPDDKSNQTLESAEDARDRHSIKNEVTL          |
| XM_008942236.1:Merops nubicus                  | -----VESRESQ--VRSVAEIPDDNSNQTLESIEDARDRHSIENNEVTL         |
| XM_010019624.1:Nestor notabilis                | -----VESRESQ--VRSVAEIPDDNSNQTLESIEDARDRHSIENNEVTL         |
| XM_005146580.1:Melopsittacus undulatus         | -----MESRESQ--VHVSAEIPDDNSNQTLESAEDARQGHHSIENNEVTL        |
| XM_009559526.1:Cuculus canorus                 | -----VESRERQSSRVSAESPDDNSNQTLESAEDAHDRHSIENNEVTL          |
| XM_005444503.1:Falco cherrug                   | -----VESRERQSSRVSAESPDDNSNQTLESAEDAHDRHSIENNEVTL          |
| XM_005233595.1:Falco peregrinus                | -----VESRERQSSRVSAESPDDNSNQTLESAEDAHDRHSIENNEVTL          |
| XM_009073853.1:Acanthisitta chloris            | -----VESRESQ--DQASSEISDDTSNQTLESAEDSQDRHSIENNEVTL         |
| XM_008930247.2:Manacus vitellinus              | -----VESRESQ--VRSVAEVSDDNSNQTLESAEDSQDRHSIENNEVTL         |
| NW_016690259.1:Lepidothrix coronata            | -----VESRESQ--VRSVAEVSDDNSNQTLESAEDSQDRHSIENNEVTL         |
| XM_010202192.1:Colius striatus                 | -----MESRESQ--VLSVAEIPDDNSNQTVESTEDAQDRPSIENNEVTL         |
| XM_010173470.1:Crimulmus carolinensis          | -----MESRESQ--VHVSAEIPDDNSNQTLESAEDAQDRHSIENNEVTR         |
| XM_010181850.1:Mesitornis unicolor             | -----IESKESQ--VHVSAEIPDDNSSQMLSAEDAQEHHSIKNEVTL           |
| XM_009868641.1:Apaloderma vittatum             | -----MESRESQ--VRI SAEVPPDDNSNQTLESAEDARDRHSIENNEVTL       |
| XM_009958978.1:Leptosomus discolor             | -----IESRESQ--VHS SAEFPDDNSNQTLESAEDARDRHSIENNEVTL        |
| XM_010079868.1:Pterocles gutturalis            | -----VESRESQ--VHVSAEIPDDNSNQTLESAEDARDRHSIENNEVTL         |
| XM_010119303.1:Chlamydotis macqueenii          | -----LESKESQ--VHV SSEIPDDNSNQTLESAEDAQDHHHSIENNEVTF       |
| XM_009970430.1:Tyto alba                       | -----MESRESQ--AHV SAE SRDDNSNQTLESTEDAQDHHHSIENNEVTL      |
| XM_009932280.1:Opisthocomus hoazin             | -----VESRESQ--VRI SAEVPPDDNSNQTLESAEDAQDRHSIENNEVTL       |
| XM_010145609.1:Buceros rhinoceros silvestris   | -----VESRESQ--VRSVAEIPDDNSNQTLESAEDAQDRHSIENNEVTL         |
| XM_009978083.1:Tauraco erythrolophus           | -----VESRESQ--VRI SAEIPDENSNQTLESAEDARDRHSIENNEVTL        |
| XM_010154680.1:Eurypyga helias                 | -----TESKESQ--VRSVAEIPDDNSNQTLESAEDAQDRHSIENNEVTH         |
| XM_009639993.1:Egretta garzetta                | -----MESKESQ--VHVSAEIPDDNSNQTLESTEDAQDHHHSIENNEVTL        |
| XM_009327481.1:Pygocselis adeliae              | -----MESRESQ--VHVSAEIPDDNSNQTLESAEDAQDRHSIENNEVTL         |
| XM_009280227.1:Aptenodytes forsteri            | -----MESKESQ--VHVSAEIPDDNSNQTLESAEDARDRHSIENNEVTL         |
| XM_009512482.1:Phalacrocorax carbo             | -----MESRESQ--VHVSAEIPDDNSNQTLESAEDAQDHHHSIENNEVTL        |
| XM_014961493.1:Calidris pugnax                 | -----MESRESQ--VRSVAENPKDNSNQTLESAEDAQDHHHSIENNEVTL        |
| XM_009813620.1:Gavial stellata                 | -----VESRESQ--VRSVAEIPDDNSNQTLESAEDAQDRHSIENNEVTL         |
| XM_009916485.1:Halialaetus albicilla           | -----MESRESQ--VRSVAETPDDNSNQTLESAEDARDRHSIENNEVTL         |
| XM_010569846.1:Halialaetus leucocephalus       | -----MESRESQ--VRSVAETPDDNSNQTLESAEDARDRHSIENNEVTL         |
| XM_011600806.1:Aquila chrysaetos canadensis    | -----MESRESQ--VRSVAEIPDDNSNQTLESAEDARDRHSIENNEVTL         |
| XM_009490811.1:Pelecanus crispus               | -----MESRESQ--VRSVAEIPDDNSNQTLESAEDARDRHSIENNEVTL         |
| XM_009694723.1:Cariama cristata                | -----MESRESQ--VHVSAEIPDDNSNQTLESAEDSRDHSIENNEVTL          |
| XM_010311221.1:Balearica regulorum gibbericeps | -----VESRENQ--DRVSAEIPDNDNSNQTLESAEDAQDHHHSIENNEVTL       |
| XM_010287426.1:Phaethon lepturus               | -----MESRESQ--VRSVAEIPDDNSNQTLESAEDAQDHHHSIENNEVTL        |
| XM_009890748.1:Charadrius vociferus            | -----MESRESQ--VRSVAEIPDDNSNQTLESAEDAQDHHHSIENNEVTL        |
| XM_009584852.1:Fulmarus glacialis              | -----MESRESQ--VHVSAEIPDDNSNQTLESAEDAQDHHHSIENNEVTL        |
| XM_009467655.1:Nipponia nippon                 | -----MESRESQ--VHVSAEIPDDNSNQTLESAEDAQDHHHSIENNEVTL        |

**Table S1.14: Osteopontin in Aves.** The large number of available sequences reveals 4 distinct subgroups (separated by free lines). The *Limosa lapponica baueri* sequence has a long unique N-terminal stretch, which requires corroboration.

NC\_030431.1:*Ictalurus punctatus*  
NC\_007121.7:*Danio rerio*  
NM\_001124267.1:*Oncorhynchus mykiss*  
AF223388.1:*Salvelinus fontinalis*  
NW\_018128285.1:*Monopterus albus*  
AY651247.1:*Sparus aurata*  
NW\_019174336.1:*Seriola dumerili*  
JN854244.1:*Oreochromis mossambicus*(partial)  
NW\_016094914.1:*Kryptolebias marmoratus*  
NW\_015443488.1:*Nothobranchius furzeri*

-MHFDWLNPEAAGFKSQAAVSIKTKQDLKQETWKVVVDPLSDSSKKVRFRTAAEEQNTPRK  
-----  
-----  
-----  
-----  
-----  
-----  
-----  
-----

NC\_030431.1:*Ictalurus punctatus*  
NC\_007121.7:*Danio rerio*  
NM\_001124267.1:*Oncorhynchus mykiss*  
AF223388.1:*salvelinus\_fontinalis*  
NW\_018128285.1:*monopterus\_albus*  
AY651247.1:*sparus\_aurata*  
NW\_019174336.1:*seriola\_dumerili*  
JN854244.1:*oreochromis\_mossambicus*(partial)  
NW\_016094914.1:*kryptolebias\_marmoratus*  
NW\_015443488.1:*nothobranchius\_furzeri*

MKAVIVFVLLFAAVYCHPVKRSASSSESADL---QPVDTVQV-----LKV  
MKSIIVLTLLVATVFCVVPKRSASSSESSEELVIVQRFPPILRKAANVFOVEPT--QTT  
MKAATVAVVLLFATVLRPAIRSPGNNPESLEELVKPAPVLRGIAP---AELTEVAVPQNV  
MKAATVAVVLLFATVLRPAIRSPGNSPESSEELVKPAPVLRGIAP---AELTEVAVPQNV  
MKVAIVTVLLFATVLCGPVRKASYRSESSEEVVRRPAVPAIRKQAAVVPQSRAAHVQNV  
MKVAIVFVLLFATVLCRPARKVADSS-ESSEEVVRKPAPPALKKQAAVVPQAPAAPVQDI  
MKVAIVFILLFATVLCRPARKVSDSS-ESSEEVVRPAAPAVQTEAD-----AAPQNV  
-----ESSEEVVRQPKPALRKQAPVLLKARPPVQNV  
MKVAIVFVLLFATVLCRPARKVSVSS-ESSEEVVRRPAAPALRKQALVAPKSRPSPVKV  
MKVAIVFVLLFAAVLCRPARKVSDSS-ESSEEVVRRPAAPAVRKQAVVAAKHRAKPVQNV

: :

NC\_030431.1:*Ictalurus punctatus*  
NC\_007121.7:*Danio rerio*  
NM\_001124267.1:*Oncorhynchus mykiss*  
AF223388.1:*salvelinus\_fontinalis*  
NW\_018128285.1:*monopterus\_albus*  
AY651247.1:*sparus\_aurata*  
NW\_019174336.1:*seriola\_dumerili*  
JN854244.1:*oreochromis\_mossambicus*(partial)  
NW\_016094914.1:*kryptolebias\_marmoratus*  
NW\_015443488.1:*nothobranchius\_furzeri*

TAVA---D-----VSSEE-DDDDDD  
P----ESNESTD-----SAD-----D  
DTAT---TSDESSDK-DETEGADPTS-----DPTSADSADS-----  
DTAT---TSDESSDE-DETEGADPTS-----DPTSASTASTDSTDSADSADS  
VAAAA-IDSDSEKGSSEDESVVTT-----DGTNTALASDSTSDKSKSDSDDDDDD  
VAAA-AAGSDESSESSEDEDAQAAPEA--PVEVQSSDSDTASTSDTASVNSKSDSEDS  
VAAAA--GSDESKESSEDELEAAA-----DTSSSDTASVNSDSDSDDDDD--  
VAAAA-AGSGESAETSFEHHQQQVAEALPEVKSVVTDTT-SDSP-SVNTQDS-----E  
VAAP-AAQSDESTETSSEEDQGVAPVK-DAVKFKAISADPNPPTESPS-VISKDNDDDDDD  
VAAAAAGSDESSETSSEENQGVAVEK-ATVEFKAAAGVDTNAAPVSDKGTNSQSDSDDDDD

: :

NC\_030431.1:*Ictalurus punctatus*  
NC\_007121.7:*Danio rerio*  
NM\_001124267.1:*Oncorhynchus mykiss*  
AF223388.1:*salvelinus\_fontinalis*  
NW\_018128285.1:*monopterus\_albus*  
AY651247.1:*sparus\_aurata*  
NW\_019174336.1:*Seriola dumerili*  
JN854244.1:*Oreochromis mossambicus*(partial)  
NW\_016094914.1:*Kryptolebias marmoratus*  
NW\_015443488.1:*Nothobranchius furzeri*

-----DSDSDESDENGEP-----TSSPPIIETT-----  
TEEADEESETDEKEEENETDSSSESSEGESDITIIIPVTVDP-----TL  
-----ADSADSADSDDTDESSESESEADTTAAPATAE-----PTVEPTMATTEAP-  
-----NESKDSADSADSDDTNESSESESEADTTAAPATAE-----PTVEPTMATTEAP-  
--DNDDETK-----ETEEDESSESSEGES-STLAPATDTPVITDEPVAETTVEPIVPTI  
--DDDDETEE--SETEEDSESSESSEGES-STAVPSTLTPVIVTDAPVAETTPQPIDPTI  
-----DEAEE--ADTDEDDSSDSESSEGES-STPAPTASPVIIITEPVIETTSPRIEPTI  
DGDDDEAAEESETEEDDESSESSEGES-STPAPSTVAPVVVTEPAPPEPTDSSIVATV  
DADDDEGTEETDEDESDSSESSEGES-STPAPGTLSPAVVTAEPVPEPTTVDTILPSI  
-----EAEESEAEEDDESSESSEGES-STPAPGTVSPVVVTVPEPLGTTVDTILPTI

: :

NC\_030431.1:*Ictalurus punctatus*  
NC\_007121.7:*Danio rerio*  
NM\_001124267.1:*Oncorhynchus mykiss*  
AF223388.1:*salvelinus fontinalis*  
NW\_018128285.1:*monopterus albus*  
AY651247.1:*sparus aurata*  
NW\_019174336.1:*seriola dumerili*  
JN854244.1:*oreochromis mossambicus*(partial)  
NW\_016094914.1:*kryptolebias marmoratus*  
NW\_015443488.1:*nothobranchius furzeri*

LIPVINGRGRGDSI-GFQSDYKKPVYVVDGNNIEKGPS SHKSYGSD-----KTKYD  
GPIINTGRGDSL-GYPSDYKKSIIYVDADFEKLPSPYKSYSSDKLGLTFVSKKTSAYD  
--IYDDGRGDSM-GYPSDYKKSIIYVDTNNIEKGPSYKSYGKI--DEGMYAGKKSIVYN  
--IYDDGRGDSM-GYPSDYKKSIIYVDTNNIEKGPSYKAYGKM--DEGLYTGKKSIVLYD  
VTDADTGHGDNMRGYPGDY-KSIVYVEDKSYHKIPVAYKSYEFV--GTGK----KTAYD  
VTDTETRGRGDSYGGYPSDY-KSIDYVEEKTYKVPVPYKSYELV--GTGK----KMAYD  
VTDTEARGDNYGGYPGDY-KSIVYVEDKSYHKVPAPYKSYEFV--GAGK----KMAYD  
VTD--TARGDNLGGYPSY-KSIVYVEEKSYHKAPYKSYEFV--DTGK----KTAYS  
VTDTDSRGRGDSLGGYPGDY-KSIMYVEEKSYHKVPVPYKSYEIV--CAEK----KLGVD  
VTDPDAGRGDNLGGYPGDY-KSI-YVEEKTYHKMSGPYKSYEFV--DSGK----KTGYD  
.:\*\*.\* : :.\* \* : \*\* : : \* : \*\*.\* \*

NC\_030431.1:*Ictalurus punctatus*  
NC\_007121.7:*Danio rerio*  
NM\_001124267.1:*Oncorhynchus mykiss*  
AF223388.1:*salvelinus fontinalis*  
NW\_018128285.1:*monopterus albus*  
AY651247.1:*sparus aurata*  
NW\_019174336.1:*seriola dumerili*  
JN854244.1:*oreochromis mossambicus*(partial)  
NW\_016094914.1:*kryptolebias marmoratus*  
NW\_015443488.1:*nothobranchius furzeri*

GA-----DLKVKYKAL--QVHNV-----GLDQGVDASSGTDSDSDASQOEQKAAS  
DQSINDVEKEITLYKAL--QVHDL E-DGNTSTSEIDNIEAN-----ERQAALG  
TGLGNKIEKTMVFKAL--QVHDL M-EEDTSTPDVESQVLDASSGKA EESSMRKAHVDA  
TGLGNEIEKKMTGFKAL--QVHDL M-EEDTSTPDVESQVLDSSSGKA EEPQQRQAHVDA  
MTEGNEVEKSLKVKYKAI--QVHSDLVEEDTSTPEVESQGLDASSVITQD--HCEEGASP  
MTDGNEVEKSLQVKYKAL--QVHSDILEEDTSTPEVESQGLDTSSGTSQD--QDLRQASLP  
MTDGNEVEKSLKVKYKAL--QVHSDILEEDTSTPEVESQGLDATSQ-DQA--ISPRQASLP  
MTGGNEVEKLPKVYKTIY--VNPELLEEDTST-----  
MTDVNEVEKLPKVYKQVAFQIQSDILEEDTSTPEVESQGLDVSSGTSQDQDINPRQASLP  
MTDGNEVEKSPKVYKQVAFHTQSQLLEEDTSTPEVE TQSLDVSSGTSQDQDISHRQASLP  
:\* : :

NC\_030431.1:*Ictalurus punctatus*  
NC\_007121.7:*Danio rerio*  
NM\_001124267.1:*Oncorhynchus mykiss*  
AF223388.1:*salvelinus fontinalis*  
NW\_018128285.1:*monopterus albus*  
AY651247.1:*sparus aurata*  
NW\_019174336.1:*seriola dumerili*  
JN854244.1:*oreochromis mossambicus*(partial)  
NW\_016094914.1:*kryptolebias marmoratus*  
NW\_015443488.1:*nothobranchius furzeri*

-----SSSAS-----DAVPSQ-ESEEDSQSSEEN  
AQEIVPVGDAQA-----TEEGASARDSPSDSASASASQ-EENEESDSEET  
SQDRTPSESPESQKAKSLES DATSEL---TSSASSDGTSESTSTASNETDSSNSSEEA  
SQDRTPSESPESQKAKSLES DATSVR---TSSASSDGTSESTSTASNETDSSNSSEEA  
S-----DA-----TTSTPEEEEEEE-----EESASTSQESEDKESQSSEEA  
EEESTSTS-----DATTESESSSTPEEEEEESASTASEDDSTSTSQESEDEESQSSEEA  
EEATASTSEASASDATASESESSAPQEEEEED-SASTASDSASTSQESEDEESQSSEEA  
-----  
FEES-----TAGESSSSTPEEEEEESAST-----TAEEDDEESQSSEEA  
EEAS-----TTSES DSSSTPEEEGEEESAST-----SSSASAESDDEESQSNEET

NC\_030431.1:*Ictalurus punctatus*  
NC\_007121.7:*Danio rerio*  
NM\_001124267.1:*Oncorhynchus mykiss*  
AF223388.1:*salvelinus fontinalis*  
NW\_018128285.1:*monopterus albus*  
AY651247.1:*sparus aurata*  
NW\_019174336.1:*seriola dumerili*  
JN854244.1:*oreochromis mossambicus*(partial)  
NW\_016094914.1:*kryptolebias marmoratus*  
NW\_015443488.1:*nothobranchius furzeri*

TTAATAIDSNSSSEDESEETNT-----ADQPALLKNENPEVLIA-  
TSTPGAADSESNSSQSTESTESQESDSDE-ETTQTTEASIIIVK-  
TARPGAADSDSAESNESHDSDSDSAEEAATVATIITDAPVITAK  
TARPGAADSDSAESNESHDSDSDSAEEAATVATIITDAPVVITAK  
TVTPGAADSDSDESDESDE---S-----EGTGPDATTDPLVITAK  
TATPGAADSDSDESDESAG---SDS-DEQAAGPDTTDMPVVITAK  
TATPGAADSDSDESDESKE---SDS-DEQGAGPDTTDMPVVITAK  
-----  
TATPGA S D S D E D --- D S V E --- S D S - D E E A V G P D V T T D M P A V V T A K  
TATPGAADSDSDESESESE---GDS-NEEGEGPDATADMPAVLTAK

**Table S1.15: Osteopontin in Fish.** Alignment after elimination of KX833902.1 (*Polypterus senegalus*) and XM\_006007328.1 (*Latimeria chalumnae*).

**Table S2: Alignment of the osteopontin amino acids by taxonomic groups.** **2.1.** Canonical sequences were derived from each group in Table S1. They were aligned with Clustal Omega, followed by manual adjustments. These adjustments reflect investigator supervision to override the rigid gap creation and gap extension rules of the program and bring common sequences together. The signal sequence (light gray) and the preserved GRGD motif are framed. The transparent blue boxes highlight the SSEE motifs; the transparent green box depicts the histidine-rich, variable-length domain in Reptilia and Aves; the (Q/E)TLP(S/D) sequence marks the beginning of the central domain and is shown dark purple background; the poly-aspartate sequences are on yellow background; the transparent red box covers the GRGD domain with the upstream sequences; the transparent dark purple box shows the potential thrombin cleavage site and heparin binding site; a second heparin binding site in primates (RL(Y/H)KRK) is marked by a light purple box (with a conserved stretch upstream in very light purple); between the heparin binding sites is a conserved domain of unknown function that is shown in a transparent faint orange box; the gray boxes depict the C-terminal domains. The colors match those in Figure 1. Common polymorphisms are indicated by lower case letters in smaller font. Lower case x indicates any amino acid. Variable inserts are within parentheses. **2.2.** From an alignment of all sequences retrieved, shown are two representatives of each group (4 representatives for 2 subgroups of Aves). The horizontal lines separate three clusters of distinct osteopontins. The birds and reptiles on top have high internal similarity. The Fish sequences (middle) are very different from all others. Eutheria and Prototheria (bottom) display a pattern that is internally similar, but clearly distinct from Fish and from Reptilia/Aves. The box covering all entries at the beginning of the alignments represents the putative signal sequence. Among the birds and reptiles, differences include a far N-terminal histidine-rich insert in the Squamata (boxed), a deletion (2<sup>nd</sup> small box) and a short substitution (3<sup>rd</sup> small box) in a subset of birds. Cervidae and Bovidae lack a sequence of about 20 amino acids in the downstream part of osteopontin (box across two lines). Reptilia,c+t = Crocodylia and Testudines, Artiodactyla,c+b = Cervidae and Bovidae, Afro+Xen = Afrotheria and Xenarthra, Artiodactyla,ccs = Camelidae Celacea and Suidae.



|                      |                                                                                                                                                                                                                                                                                               |
|----------------------|-----------------------------------------------------------------------------------------------------------------------------------------------------------------------------------------------------------------------------------------------------------------------------------------------|
| Fish                 | MK <sub>av</sub> A <sub>iv</sub> VFVLLFATVLC <sub>CRP</sub> <sub>av rik rk sv peax</sub> SS <sub>sep - sed</sub> SSEEVV <sub>rqp rp ap vp</sub> PALRKQ-----                                                                                                                                   |
| Prototheria          | MRTAVICLCLISIIACALPVKRSGPEANS <sub>GS</sub> SEEKQLYNKH-----                                                                                                                                                                                                                                   |
| Marsupialia          | MRTAVICFCLLGIVSALPVKQ---QINS <sub>GS</sub> SEEKxLYSKH-----                                                                                                                                                                                                                                    |
| Carnivora            | MR <sub>il</sub> AVICFCLLGIAYTIPIK----Q <sub>tap</sub> DSGSSEEKQLY <sub>nh</sub> KY-----                                                                                                                                                                                                      |
| Artiodactyla(b)      | MRIAVICFCLLGIASALPVK----PTSS <sub>GS</sub> SEEKQLN <sub>NN</sub> KY-----                                                                                                                                                                                                                      |
| Rodentia             | MR <sub>lfi</sub> AVICFCL <sub>lfi</sub> GIA <sub>sy</sub> SLPVK----v <sub>q at</sub> DSGSSEE <sub>kr</sub> X <sub>hl</sub> Y <sub>sn</sub> K <sub>hl</sub> -----                                                                                                                             |
| Artiodactyla(a)      | M <sub>kr il</sub> AVICFCLLGIASALPV <sub>gk</sub> ----QT <sub>dn</sub> SGSSEEKQL <sub>nys</sub> NKY-----                                                                                                                                                                                      |
| Lagomorpha(+similar) | MRIAVICFCLLG <sub>im</sub> AYALPVK----h <sub>q</sub> xDSGSSEEKQLYxKY-----                                                                                                                                                                                                                     |
| Eutheria(various)    | MR <sub>xx</sub> VICFCLLG <sub>xx</sub> S <sub>xx</sub> XPVKx---Q <sub>at</sub> DSGSSEEKQLYNKY-----                                                                                                                                                                                           |
| Afrotheria,Xenarthra | MRIAVICFCLLGIAYALPVKx---QADSGSSEEKQL <sub>yh</sub> SKY-----                                                                                                                                                                                                                                   |
| Perissodactyla       | MRIAVICLCLLGIAYALPVN----QADSGSSEEKQLYNKH-----                                                                                                                                                                                                                                                 |
| Chiroptera           | MRIAVICFCL <sub>lv</sub> GIAYALPVK----HADSGSSEERQL <sub>yf</sub> NK <sub>hy</sub> -----                                                                                                                                                                                                       |
| Primata              | MRIAVI <sub>cs</sub> FCLLGI <sub>at</sub> YALPVK----QADSGSSEEKQLYNKY-----                                                                                                                                                                                                                     |
| Reptilia(b)          | MKIAVL <sub>ic</sub> LCLF <sub>T</sub> <sub>vi</sub> AFALPISKSRH <sub>H</sub> <sub>DD</sub> <sub>S</sub> <sub>rgm</sub> SAERKH <sub>S</sub> <sub>SRE</sub> <sub>nh eh ah</sub> HAHHHHHH <sub>nh</sub> SHSHEHSQE                                                                               |
| Aves(1)              | MKLALLCLCFISIAAAWPVSKSKQH <sub>AI</sub> SASSEEKYDPRS---HH <sub>at</sub> HR <sub>Y</sub> HQ---DHVDSQ-                                                                                                                                                                                          |
| Reptilia(a)          | MK <sub>ti</sub> AVLCLCLI <sub>gs</sub> I <sub>A</sub> FALPVSKSKH <sub>hrq pa di</sub> <sub>S</sub> <sub>re</sub> SSEE <sub>rn dh</sub> DSRS---HH <sub>sh</sub> HR <sub>H</sub> HHH---Q <sub>rh</sub> V <sub>qh ti</sub> qe-                                                                  |
| Aves(3)              | MK <sub>ve</sub> AVLCLCLISITA <sub>A</sub> WPV <sub>iv qp</sub> SK <sub>qh</sub> H <sub>AI</sub> SASSEEKYDSRG---HHL <sub>hr</sub> RY <sub>Hnd</sub> ---D <sub>ny vme</sub> NSQ-                                                                                                               |
| Aves(2)              | MKVAVLCLCLISITV <sub>A</sub> WPVSKSKQH <sub>AV</sub> SASSEEKYDSRG---HHS <sub>HR</sub> ---HH <sub>H</sub> HVNSQ-                                                                                                                                                                               |
| Aves(4)              | MK <sub>va</sub> AVLCLCLIS <sub>iv tav atv</sub> <sub>A</sub> WPV <sub>sn</sub> SK <sub>gk</sub> <sub>HA</sub> <sub>S</sub> <sub>AS</sub> SEEK <sub>YD</sub> <sub>pas rk</sub> G---HH <sub>s1</sub> HR <sub>yqh hqr</sub> H(HH) <sub>hd</sub> <sub>H</sub> <sub>vm</sub> NS <sub>qh</sub> --- |
|                      | * : : : * * : *                                                                                                                                                                                                                                                                               |

|                       |                                                                                                                                                               |                                                                                                                                                                                                                                          |
|-----------------------|---------------------------------------------------------------------------------------------------------------------------------------------------------------|------------------------------------------------------------------------------------------------------------------------------------------------------------------------------------------------------------------------------------------|
| Fish                  | ---                                                                                                                                                           | A <sub>va</sub> xV <sub>pe</sub> x <sub>re</sub> APVQNV <sub>vd</sub> AAAA <sub>x</sub> at GSD <sub>st</sub> ES <sub>ed</sub> S <sub>ed</sub> EDEG <sub>av</sub> ad P <sub>evt</sub> xxxxxxxxxxxx <sub>td</sub> ap X <sub>st</sub> sd sd |
| Prototheria           | ---                                                                                                                                                           | PNQLSSWLNTDPSQKQALLA-----PQNLVSSEESKE-----NIQQQTLPSIS                                                                                                                                                                                    |
| Marsupialia           | ---                                                                                                                                                           | PNFVATWLNADPSQKQTLA-----TQNSVSSEESTE-----DLQETLPxNS                                                                                                                                                                                      |
| Carnivora             | ---                                                                                                                                                           | PGAVATW <sub>pl</sub> KPDPSQKQTF <sub>late</sub> LA-----LQ <sub>at</sub> VLS <sub>eq</sub> E <sub>tn</sub> DD-----F <sub>kq</sub> QKTL <sub>as</sub> SKS                                                                                 |
| Artiodactyla(b)       | ---                                                                                                                                                           | PDAVATW <sub>late</sub> LKPDPSQKQTF <sub>late</sub> LA-----PQNSVSSEETDD-----NKQNTLPSKS                                                                                                                                                   |
| Rodentia              | ---                                                                                                                                                           | <sub>pt</sub> ed A <sub>vim</sub> as <sub>ts</sub> WL <sub>vek</sub> PDPSQKQ <sub>sn</sub> LLA-----PQ <sub>x</sub> VSSEE <sub>tk</sub> DD----- <sub>lf</sub> KQETLPSNS                                                                   |
| Artiodactyla(a)       | ---                                                                                                                                                           | PDAVATW <sub>late</sub> LKPDPSQKQTF <sub>late</sub> LA-----PQ <sub>sn</sub> T <sub>aiv</sub> SSEE <sub>(D)</sub> dn----- <sub>nf</sub> KQETLPS <sub>tk</sub> S                                                                           |
| Lagomorpha(+similar)  | ---                                                                                                                                                           | PDA <sub>vl</sub> ATW <sub>late</sub> LKPDPSQKQ <sub>sn</sub> LLx-----PQ <sub>x</sub> AVSSEE <sub>tk</sub> DD-----LKQETLPSKS                                                                                                             |
| Eutheria(various)     | ---                                                                                                                                                           | PDAVATW <sub>late</sub> LKPDPSQKQTF <sub>late</sub> LA-----PQ <sub>at</sub> VSSEE <sub>tk</sub> xD-----xKQETLPSKS                                                                                                                        |
| Afrotheria, Xenarthra | ---                                                                                                                                                           | PDAVATW <sub>late</sub> LKPDPSYKQ <sub>it</sub> LLA-----PQNAV <sub>at</sub> SSEE <sub>tk</sub> TDx-----LKQETLPSKS                                                                                                                        |
| Perissodactyla        | ---                                                                                                                                                           | SDAVSIW <sub>late</sub> LKPDPSQKQ <sub>sn</sub> LLA-----PQT-VSSEE <sub>tk</sub> TDN-----LKQETLPSQS                                                                                                                                       |
| Chiroptera            | ---                                                                                                                                                           | PDAVATW <sub>late</sub> LKPDPSQKQ <sub>sn</sub> LLA-----PQ <sub>at</sub> VSSEE <sub>tk</sub> TD <sub>dn</sub> -----FKQETLPS <sub>gkt</sub> S                                                                                             |
| Primata               | ---                                                                                                                                                           | PDAVATW <sub>late</sub> L <sub>kn</sub> PDPSQKQ <sub>sn</sub> LLA-----PQNAV <sub>at</sub> SSEE <sub>tk</sub> TD <sub>nd</sub> -----FKQETLPSKS                                                                                            |
| Reptilia(b)           | H <sub>gv</sub> NSHEHSQES <sub>pq</sub> EH--(EQQ) <sub>av</sub> SS-----QLNSQS <sub>ls</sub> E <sub>de</sub> rsDE-----ITEQQTL <sub>Lav</sub> SS                |                                                                                                                                                                                                                                          |
| Aves(1)               | -----SQEHLQQTQNDL <sub>av</sub> SL-----QQTHYSSEENAD-----VPEQPDPFPDIP                                                                                          |                                                                                                                                                                                                                                          |
| Reptilia(a)           | -----SRV <sub>sr</sub> P <sub>pa</sub> x <sub>at</sub> QEV <sub>hl</sub> V <sub>pl</sub> P-----QQTSFSSEESVE-----V <sub>pt</sub> ek qr Qxxxxxx(A)              |                                                                                                                                                                                                                                          |
| Aves(3)               | -----SQESQQHPQSDLASS-----QQTL <sub>lyh</sub> SSEES <sub>vm</sub> D-----VP <sub>ev</sub> QLHFPDVS                                                              |                                                                                                                                                                                                                                          |
| Aves(2)               | -----SxESLLxPRDDL <sub>av</sub> ASP-----QQTLYSSEERAV-----VPVxxRFPxVx                                                                                          |                                                                                                                                                                                                                                          |
| Aves(4)               | -----SWE <sub>sr</sub> lqQH <sub>pts</sub> Q <sub>nd</sub> DL <sub>vam</sub> SP-----QQTLYSSEES <sub>vm</sub> D-----VP <sub>ve</sub> qk P <sub>hq</sub> FDPDVS |                                                                                                                                                                                                                                          |

\* :

|                      |                                                                                                                                                                                                                 |
|----------------------|-----------------------------------------------------------------------------------------------------------------------------------------------------------------------------------------------------------------|
| Fish                 | TASVNS <sub>qk</sub> DS-DDDDDDxxDDDDDE <sub>ta</sub> EES <sub>ea</sub> X <sub>des</sub> ----- <sub>ae de se des ed ds sd sed</sub> SSESGES <sub>st</sub> T <sub>ap</sub>                                        |
| Prototheria          | ---NESHDDVDDADDQDDSD-----HKD---ESDDSDDES                                                                                                                                                                        |
| Marsupialia          | ---xESPDDIDDxDDDDGDxG-----HKST---DSDDSDDES                                                                                                                                                                      |
| Carnivora            | --- <sub>nd</sub> ESH <sub>de dv vd</sub> DEDD <sub>egr</sub> DD-----VDSQDSVDS <sub>hn</sub> D----- <sub>tv</sub> DD---DSNQSDDES                                                                                |
| Artiodactyla(b)      | ---NESPEQTDDLDDDD <sub>de</sub> NSQ----- <sub>de</sub> V <sub>tn</sub> S <sub>dn</sub> DSDD <sub>at de nt pt</sub> DD <sub>ps</sub> DHS <sub>dn</sub> ---ESHHSDES                                               |
| Rodentia             | ---NESH <sub>dh</sub> MD <sub>vd</sub> DDDDDDGD <sub>hq av edn</sub> SZ <sub>qe</sub> DSVDS <sub>de</sub> SD <sub>de</sub> DD <sub>hd</sub> PDD <sub>sd hd he sp</sub> D--- <sub>de</sub> S <sub>hd</sub> HSDES |
| Artiodactyla(a)      | ---NESP <sub>de</sub> HTD <sub>dt</sub> VDD <sub>de de</sub> D <sub>deg dt vsh</sub> --- <sub>dqv ds</sub> ---Qd <sub>vad</sub> xxxxxx <sub>dn hd tas dn</sub> D <sub>ta</sub> D <sub>rh</sub> SD---ESHHSDES    |
| Lagomorpha(+similar) | ---xESH <sub>dh</sub> DM <sub>tm</sub> DD <sub>vi</sub> D <sub>de de de</sub> Dx <sub>dn</sub> H---VDSxDSxDxDDD-xxxxxDDSHHS---ESHHSDES                                                                          |
| Eutheria(various)    | ---NES <sub>x</sub> DHTDD <sub>av</sub> DDEDDGDH--- <sub>qv</sub> DS---xxSDD <sub>SxDx</sub> DHxDDx <sub>DH</sub> SD---ESHHSDES                                                                                 |
| Afrotheria,Xenarthra | ---NES <sub>hg</sub> DQTDDVDEDD <sub>gs</sub> DH---VDSQDSV <sub>de</sub> SDDSDDDHTDDPDHSD---ESHHSDES                                                                                                            |
| Perissodactyla       | ---NESH <sub>dh</sub> TD <sub>vd</sub> DDDDGDH---EDDQDSIDSDDSD <sub>ETDPTDDPD</sub> NSD---ESHHSDES                                                                                                              |
| Chiroptera           | ---NES <sub>qh</sub> D <sub>lh</sub> TDDVDD <sub>de</sub> DDE <sub>dh</sub> H---VDSQD <sub>sh</sub> IDS <sub>nd</sub> DSDD <sub>ad</sub> D <sub>hr tp</sub> DD <sub>sp</sub> DNSD---ESHHSDES                    |
| Primata              | ---NESH <sub>dh</sub> MD <sub>vd</sub> DD <sub>ed</sub> DDDDH---VDSQDSIDSNDSD <sub>ed</sub> VDDTDDSHQSD---ESHHSDES                                                                                              |
| Reptilia(b)          | ---SKS <sub>nh</sub> EDDD <sub>dn</sub> HSDV <sub>sd kd</sub> DDD-----HxDxxD---DSDESDES                                                                                                                         |
| Aves(1)              | ---SKSQEAVDDDD-D-----DDN---DSNDTDES                                                                                                                                                                             |
| Reptilia(a)          | ---S <sub>vr</sub> S <sub>nt</sub> E <sub>sd ed (G)</sub> D <sub>hd</sub> ----- <sub>hd</sub> D <sub>nd</sub> ---DSNDTDES                                                                                       |
| Aves(3)              | ---SKSHEDVDDDDDD-----DDN---DSNDTDES                                                                                                                                                                             |
| Aves(2)              | ---SKSHEDPDDD--V-----DDN---DSNDTDES                                                                                                                                                                             |
| Aves(4)              | ---SKSHEDVDDD-- <sub>dn</sub> -----DD <sub>nd</sub> ---DSNDTDES                                                                                                                                                 |
|                      | * : . :                                                                                                                                                                                                         |

. \* . : . \* \*

|                      |                                                                                                                                                                                                                                           |
|----------------------|-------------------------------------------------------------------------------------------------------------------------------------------------------------------------------------------------------------------------------------------|
| Fish                 | APxT <sub>val ts</sub> PVI <sub>vi</sub> TxE <sub>pav</sub> EPV <sub>pt</sub> T <sub>vm da pt</sub> I <sub>lev pa</sub> TIV-----TDxDTGRGD <sub>sn lmy(G)</sub> GYP <sub>gs</sub> DY <sub>(K)</sub> KSI <sub>vi</sub> YV <sub>ed edt</sub> |
| Prototheria          | -----DEVVTD <sub>F</sub> PTDVPATAVFTPAAP-----TRGDNGGRGDRVYR-GLKTKPGVLYKA-                                                                                                                                                                 |
| Marsupialia          | -----DEVVTD <sub>F</sub> PTDTPxTSSFLPDGP-----TRGDNGGRGDSVAY-GLRSKVGAPYRS-                                                                                                                                                                 |
| Carnivora            | -----DELVTDFPTD <sub>vif</sub> PATQFFTPAVP-----TRDS <sub>yn</sub> DGRGDSVA <sub>yh</sub> -GLRS <sub>kr</sub> SKKSHRY-                                                                                                                     |
| Artiodactyla(b)      | -----DE <sub>va</sub> --DFPTDIPT <sub>ti</sub> AV <sub>sf</sub> TP <sub>pf if</sub> P-----TE <sub>ns ta</sub> NDGRGDSVAY-GLKS <sub>kr</sub> SKKFRRS-                                                                                      |
| Rodentia             | -----Dex <sub>vfi</sub> Tx <sub>sa</sub> PT <sub>nd gt pt qe ta epd vt</sub> F <sub>TP</sub> viaVP-----TV <sub>ed tvi py</sub> DGRGDS <sub>vl</sub> AY-GLRS <sub>rk</sub> S <sub>rk sk lf hyq vi</sub> S-                                 |
| Artiodactyla(a)      | -----DEVVTD <sub>F</sub> PTD <sub>ivt</sub> PAT <sub>as</sub> VFT <sub>P</sub> apVP-----T <sub>eg</sub> D <sub>tp qyn de</sub> GRGD <sub>ns vi agv</sub> Y-agLR <sub>ts</sub> KSK <sub>km</sub> F <sub>rh</sub> RS-                       |
| Lagomorpha(+similar) | -----DE <sub>lv</sub> xTDSPT <sub>dex</sub> PATPVFT <sub>P</sub> avVP-----TxDTYDGRGDSVAY-rgL <sub>kr</sub> SKSK <sub>xfl</sub> XXS-                                                                                                       |
| Eutheria(various)    | -----DEVVTD <sub>F</sub> PTDVPATPVFTPAVP-----TGDTYDGRGDSVAY-GLRSKSKKLYRS-                                                                                                                                                                 |
| Afrotheria,Xenarthra | -----DELVT <sub>(DFPT)</sub> D <sub>dv</sub> PATPVFTPAVP-----TVDTYDGRGDSV <sub>va</sub> Y-rgLRSKSK <sub>kr</sub> KIxxS-                                                                                                                   |
| Perissodactyla       | -----DELVTDFSTDVPATPVFTPAVP-----TRDTYDGRGDSLSY-GLKSKSRKFRRS-                                                                                                                                                                              |
| Chiroptera           | -----DELVTDFPTD <sub>f1</sub> PGTP <sub>fvi avf</sub> TPAVP-----T <sub>ri</sub> DT <sub>ny</sub> DGRGDSVAY-rgL <sub>kr ls</sub> KSK <sub>f1</sub> HRS-                                                                                    |
| Primata              | -----DELVTDFPTDLPATEVFTPVVP-----TVD <sub>it</sub> YDGRGDSV <sub>x</sub> Y-GLRSKSKKFRRP-                                                                                                                                                   |
| Reptilia(b)          | -----HE <sub>tnv fv</sub> TDxPT <sub>qd as</sub> P <sub>vf</sub> Tx <sub>(PVXP)</sub> D <sub>sp fv</sub> -----TGRGD <sub>vs</sub> APY-G <sub>ifkr</sub> RAKVD <sub>lq mv sh</sub> ----                                                    |
| Aves(1)              | -----DEVVTD <sub>F</sub> PT <sub>E</sub> APVT-----PF-----NRGDNAGRGDSVAY-GFRAKAHV-----                                                                                                                                                     |
| Reptilia(a)          | -----DEDAVTDFPTD <sub>af</sub> PVT <sub>te pt lf pt</sub> P <sub>af lps</sub> P-----TRGDNSGRGDSV <sub>ag</sub> Y-RMRAKAKLV <sub>(DVY-</sub>                                                                                               |
| Aves(3)              | -----EEVVT <sub>si</sub> FPTDIPVTEPFPTFPF-----T <sub>rq</sub> GDNAGRGDSVAY-RM <sub>rk</sub> AKA <sub>(ALLRAKA)</sub>                                                                                                                      |
| Aves(2)              | -----DEVVTx <sub>F</sub> PTDAPVTAPFPFPF-----TRGDNAGRGDSVAY-RIKAKAxV-----                                                                                                                                                                  |
| Aves(4)              | -----DEVVTx <sub>F</sub> PTDIPVT <sub>va</sub> PFPPFPF <sub>(GDSA)</sub> TRGDN <sub>as</sub> GRGDSVAY-RxRAKA <sub>ats</sub> x-----                                                                                                        |
|                      | * * * * *                                                                                                                                                                                                                                 |

|                      |                                                                                                                                                                                                   |
|----------------------|---------------------------------------------------------------------------------------------------------------------------------------------------------------------------------------------------|
| Fish                 | kn snt yi he K <sub>vg</sub> P <sub>vsg</sub> PYKSY <sub>eg</sub> FV <sub>gd</sub> TGK(LTGKK)K <sub>stm</sub> AYDMTDGNEVEK <sub>sl</sub> pmlK <sub>sl</sub> VYKALQVH <sub>sd</sub> dl liimLEEDTST |
| Prototheria          | -----AVQGHIDAS-DDF-T                                                                                                                                                                              |
| Marsupialia          | -----SEQVHDTVTEEDL-T                                                                                                                                                                              |
| Carnivora            | -----E <sub>dv</sub> QYPDSTEED <sub>f1</sub> -T                                                                                                                                                   |
| Artiodactyla(b)      | -----snV <sub>qe</sub> SPDATEEDF-T                                                                                                                                                                |
| Rodentia             | -----D <sub>aeq</sub> Q <sub>yfd</sub> psDATDEDL-T                                                                                                                                                |
| Artiodactyla(a)      | -----E <sub>via</sub> qe hyq pl deA(TEEDV) -tm                                                                                                                                                    |
| Lagomorpha(+similar) | -----xxQYPDAxEEDL-x                                                                                                                                                                               |
| Eutheria(various)    | -----x <sub>vi</sub> QYPDATEEDL-T                                                                                                                                                                 |
| Afrotheria,Xenarthra | -----VIQ <sub>fy</sub> PDATEEDL-T                                                                                                                                                                 |
| Perissodactyla       | -----EDQYPDATEEDL-T                                                                                                                                                                               |
| Chiroptera           | -----avVQYPDATEEDL-T                                                                                                                                                                              |
| Primata              | -----DIQYPDATDEDI-T                                                                                                                                                                               |
| Reptilia(b)          | -----if egk ksSxKSYKKSGKFDS <sub>hq</sub> DV <sub>st</sub> D <sub>ed</sub> fvDST                                                                                                                  |
| Aves(1)              | -----VKASKLRKAARKLIEDDATAEVG--                                                                                                                                                                    |
| Reptilia(a)          | HKE)-----KSS <sub>kr</sub> hl Y <sub>qk</sub> ATGKFIVHD <sub>av</sub> TEEDDST                                                                                                                     |
| Aves(3)              | -----atLLK <sub>sy</sub> ivKL <sub>hy</sub> KAAKK-L <sub>il</sub> YDATEEDES <sub>dy</sub>                                                                                                         |
| Aves(2)              | -----VKPSKLHKAARKLIVHDATEEDES                                                                                                                                                                     |
| Aves(4)              | -----xK <sub>spa</sub> si KL <sub>rh</sub> KAAKKL <sub>im</sub> XYDA <sub>ts</sub> EEDES <sub>adt</sub>                                                                                           |

\* :

|                      |                                                                                                                                                                                                                        |
|----------------------|------------------------------------------------------------------------------------------------------------------------------------------------------------------------------------------------------------------------|
| Fish                 | --PEVESQGLDASSG <sub>tk sa</sub> QDxxx <sub>qrs</sub> x <sub>rae</sub> QA-----S <sub>lv ap es eq</sub> E <sub>sr</sub> T <sub>sp st se</sub> SPE-----                                                                  |
| Prototheria          | --SRLESLESDESP---EAYPDAHKLQ-----KSSEWH--SNEASHQDDRSMQKSSEWHS                                                                                                                                                           |
| Marsupialia          | --SQMESYESEKxH---KAFPLSQNLQ-----KVSAXx--SNSKESNE-----                                                                                                                                                                  |
| Carnivora            | --SLVKSxS <sub>mt</sub> EDDF---NAVLLS <sub>hgr</sub> TVR----- <sub>gr st sp</sub> D <sub>rg</sub> D--SH <sub>va</sub> KDSQE-----                                                                                       |
| Artiodactyla(b)      | --SH <sub>vi</sub> ESEEMHDAPKK-----                                                                                                                                                                                    |
| Rodentia             | --SH <sub>vm ken</sub> SxE <sub>sl</sub> -- <sub>ls sk de at hl</sub> K <sub>av vi lp</sub> VA <sub>hgr rhl</sub> L <sub>nsk</sub> ----- <sub>vm</sub> PSD <sub>wq</sub> D--S <sub>hnt</sub> GK <sub>td</sub> SHE----- |
| Artiodactyla(a)      | -- <sub>st</sub> HVESEE <sub>avt dg deg at ph</sub> ---KAI <sub>lf vd</sub> AQ <sub>rg</sub> LH-----xASD <sub>dn</sub> --S <sub>rg gwe</sub> KDSQE-----                                                                |
| Lagomorpha(+similar) | --SH <sub>vm de</sub> SxD <sub>lm</sub> DD <sub>ae ph</sub> ---KAI <sub>pl</sub> VAQ <sub>ah</sub> L <sub>qn</sub> -----x <sub>pt</sub> SDWD--S <sub>qh qe kg</sub> DSHE-----                                          |
| Eutheria(various)    | --SHMESEELDDA <sub>ph</sub> ---KAIxVAXRLx-----RASDWD--SH <sub>gp</sub> KDSQE-----                                                                                                                                      |
| Afrotheria,Xenarthra | --SQMESKELDDAH---KAIxVxQSLK-----KVSDWD--SQQQDS <sub>hr</sub> E-----                                                                                                                                                    |
| Perissodactyla       | --SPVESKDIDDVH---KAVLVAQGLH-----VASDWD--SRGKDSQE-----                                                                                                                                                                  |
| Chiroptera           | --SH <sub>vm</sub> ES <sub>kde</sub> E <sub>mv</sub> DDA <sub>rh (KAV) kr</sub> A <sub>vi lf</sub> VAQGL <sub>phq</sub> -----VASDWD--S <sub>hpr</sub> GKDSQE-----                                                      |
| Primata              | --SH <sub>vm</sub> ESEELNGAY---KAIPV <sub>av</sub> QxLN----- <sub>va</sub> PSDWD--S <sub>rh</sub> GKDSHE-----                                                                                                          |
| Reptilia(b)          | --PD <sub>vd</sub> ESHE <sub>sy xx sa</sub> ---KA <sub>rh</sub> SL-----ES-H <sub>ed (TS)</sub> VExDDKS <sub>nd</sub> LRDSNE-----                                                                                       |
| Aves(1)              | -----DSQ <sub>lp</sub> AGLWWPKESREQDSRE-----                                                                                                                                                                           |
| Reptilia(a)          | --PD <sub>at</sub> ESQQVD <sub>sy</sub> S---K <sub>ap ql</sub> PAAH <sub>hl fv</sub> PGK <sub>sy</sub> NI-S <sub>mv</sub> EWDDKS <sub>nh</sub> M <sub>qk</sub> DSNE-----                                               |
| Aves(3)              | --MDADSQ-RS <sub>vl</sub> S---RED <sub>sp</sub> ASR <sub>rs</sub> SLRKHAS-SVWSE <sub>qr</sub> SHGRDSSE-----                                                                                                            |
| Aves(2)              | --LAADSHQAGLS---REDLGAHRSAGKYAD-SGEWGDKSHGxDSNE-----                                                                                                                                                                   |
| Aves(4)              | --LDADSQ <sub>qr vat</sub> G <sub>lf</sub> S--- <sub>qrw</sub> ED <sub>spa</sub> A <sub>av hr hr</sub> SLGKH <sub>ats iv</sub> -S <sub>grv</sub> EW <sub>as</sub> DKSH <sub>gre</sub> QDSSE-----                       |

Fish ---saQkdA-tk tas SESedSstSTPEEEEEet es SASS---xsgxSedStaSTSqaEsenEDE--ESQ-----S  
 Prototheria SEASHQDDRSVETHSHEEAKGYRLKQEDH---SSQQDDLNDSEQESYK---VSR---ENDS  
 Marsupialia --ASHPDEYSVETxSHEQLKSYQLExnXy--DSQQQSDSHGSQENDK---VSQ---EFHx  
 Carnivora --TSQVDDHSMETKS<sub>rh ra</sub>H<sub>sta kr</sub>EYKL<sub>kr</sub>ASDE---nsNKHSHEIGSQE<sub>sn Sde</sub>---VSS---ELV<sub>gs</sub>  
 Artiodactyla(b) --TSQL<sub>nt</sub>DHS<sub>ke</sub>ETNS<sub>nsd</sub>ELSKEL<sub>ktm</sub>PKAKD<sub>ek</sub>----snKHS<sub>dn vlr</sub>IESQENSK---v1SQ---EFH-  
 Rodentia --SSQLD<sub>de ph</sub>SVE<sub>ts</sub>HS<sub>hql</sub>EQ<sub>sp rkq</sub>E<sub>hy</sub>K<sub>rc</sub>KA<sub>rs hd en</sub>SxES<sub>ats ed qhl</sub>SDVIDS<sub>qkr ae sg sa rk</sub>---vaS<sub>q1</sub>---E<sub>hlf qh</sub>S  
 Artiodactyla(a) --TSQP<sub>ds</sub>D<sub>rh</sub>S<sub>mv</sub>ETHS<sub>rqh</sub>EHS<sub>ek</sub>E<sub>fy</sub>KLKA<sub>edy</sub>D<sub>edg</sub>---sg dny re HSDVI<sub>de</sub>SQ<sub>de</sub>NS<sub>kq</sub>---VS<sub>pqh</sub>---E<sub>vf</sub>HS  
 Lagomorpha(+similar) -xxSQxDDHS<sub>vm</sub>ET<sub>qh</sub>SxEQ<sub>as</sub>K<sub>qe</sub>YK<sub>rl</sub>KAxDx---SxEHSDSIDSQESSK---vsS<sub>qhl</sub>---E<sub>fs</sub>HS  
 Eutheria(various) --TSQLDDHSVETHSHEQS---KLKAxDE---SNERSDVIDSQENSK---VSH---EFHS  
 Afrotheria,Xenarthra --TSQ<sub>pl</sub>DDHSVETHSQEQSKEYKLIKAND<sub>ve</sub>---SSEHSDxIDSQE<sub>nd</sub>SK---VSQ---EFH-  
 Perissodactyla --TSQLDDHSVETHSREHSKEYQLKANDE---TSEHSDVIDSxENSK---VSQ---EFPS  
 Chiroptera --TSQLDDHS<sub>tv</sub>ET<sub>hy</sub>S<sub>thr ke lha asp ke</sub>EYKLKA<sub>nm</sub>Dae---S<sub>nge</sub>H<sub>sa dv vg</sub>IDSQENSK<sub>kr</sub>---VSH---EFHS  
 Primata --tmSQLDD<sub>qh</sub>SAETHSH<sub>ke qh</sub>SRL<sub>yh</sub>KRKASD<sub>de</sub>---SNEHSDVIDSQExSK---viS<sub>rh</sub>---EFHS  
 Reptilia(b) -VHSASHD<sub>rkt</sub>SLE<sub>nd nh</sub>S<sub>qpr eq</sub>K<sub>pl</sub>ESVED<sub>sd</sub>(HDDAD)HD<sub>nh</sub>SK<sub>av ts vi</sub>SLESTES<sub>rgt</sub>E---q1KK-----  
 Aves(1) ---LAQHQSVENDSRP<sub>rk</sub>FDSPEVDGGD-----SKASAGV-----DS  
 Reptilia(a) -V<sub>tn</sub>SRSRD<sub>dk</sub>(SMEND)S<sub>qh</sub>Q<sub>qr</sub>L<sub>de</sub>SVEVD<sub>rs</sub>D<sub>nd</sub>-----S<sub>kn</sub>PDV<sub>tp</sub>EDSHMSNES<sub>tr</sub>EQ<sub>qh qh</sub>TQ-----  
 Aves(3) -QDS<sub>dn pl hr hd</sub>RSLEN<sub>dn</sub>S<sub>rw ph</sub>KSDSHEAEGDS-----SKSGVRGDS<sub>lh sp</sub>SVE<sub>st kr</sub>ERGDS<sub>hl ps</sub>S<sub>va</sub>ES  
 Aves(2) -VVRKLPDRSLEND<sub>SR</sub>QKFDSPEXEXXS-----SExGARGxxxxSRE-----S  
 Aves(4) -LDS<sub>kn ql rhp dh rgw</sub>S<sub>mlw</sub>ENDS<sub>rq</sub>QK<sub>fl</sub>DS<sub>hr</sub>E<sub>va</sub>E<sub>igr</sub>DD(D)-----SK<sub>as</sub><sub>gs</sub>VRGDSH<sub>qhp</sub>S<sub>mv1</sub>E-----S

: \* . \*

|                      |                                                                                                                                             |
|----------------------|---------------------------------------------------------------------------------------------------------------------------------------------|
| Fish                 | SEEATATPGAADSDS-----DESD <sub>se</sub> SE <sub>x</sub> st <sub>x</sub> SDS <sub>x</sub> DE <sub>qae</sub> ATG <sub>pa dt</sub> X-----       |
| Prototheria          | QEKT-----AQDA-----                                                                                                                          |
| Marsupialia          | xEVD-----xDSQEFH-----KQQVNKLSQEFxSQEVHLVN-----                                                                                              |
| Carnivora            | -----Q <sub>ti</sub> VQS <sub>nsh</sub> EKE <sub>lr</sub> V <sub>lq</sub> -----                                                             |
| Artiodactyla(b)      | -----SLEDKLDL-----                                                                                                                          |
| Rodentia             | -----H <sub>ek</sub> FHS <sub>hq</sub> E <sub>fd</sub> K <sub>ls</sub> vh <sub>lep</sub> -----                                              |
| Artiodactyla(a)      | -----QE <sub>lf</sub> ph <sub>S</sub> hrEDKLV <sub>lp</sub> -----                                                                           |
| Lagomorpha(+similar) | -----r <sub>q</sub> EFxSHEDKLxI-----                                                                                                        |
| Eutheria(various)    | -----QE <sub>fs</sub> HSxEDKLVx-----                                                                                                        |
| Afrotheria,Xenarthra | -----SHEDKHxP-----                                                                                                                          |
| Perissodactyla       | -----QEFHSSEGKLVr-----                                                                                                                      |
| Chiroptera           | -----r <sub>q</sub> E <sub>lf</sub> h <sub>qd</sub> S <sub>rh</sub> EDKL <sub>av</sub> ls-----                                              |
| Primata              | -----HEFHS <sub>hq</sub> EDMLVV-----                                                                                                        |
| Reptilia(b)          | -----D <sub>rh</sub> SEELQQ <sub>lv</sub> D <sub>sh</sub> DHDVDDVSNQ <sub>ts</sub> LES <sub>ta</sub> ESHHSVEDHHS <sub>A</sub> EDHHSxEDHHSxE |
| Aves(1)              | RESQGSV-----PAVDT-----                                                                                                                      |
| Reptilia(a)          | -----I--(EDLQQ) <sub>vs da</sub> SVPE <sub>lv nd</sub> AD-----                                                                              |
| Aves(3)              | r <sub>w</sub> E <sub>sr</sub> rgDSHPS <sub>va</sub> ESRES <sub>qr</sub> DRVSAELSDDI-----                                                   |
| Aves(2)              | RESx-----AxVxx-xxxxxDN-----                                                                                                                 |
| Aves(4)              | r <sub>k</sub> E <sub>sr</sub> Q-----((xx)V <sub>hr</sub> viSAE <sub>x</sub> psPDDN-----                                                    |



|                      |                                                                                                                                          |
|----------------------|------------------------------------------------------------------------------------------------------------------------------------------|
| Fish                 | -----TTD <sub>ma</sub> PVVITAK                                                                                                           |
| Prototheria          | DSDEFNRKHYLKSHTSHEFDSASSETH-----                                                                                                         |
| Marsupialia          | DPESVENxKxLKLHSxxExDSASxExH-----                                                                                                         |
| Carnivora            | dhS <sub>ek</sub> S <sub>ev</sub> E <sub>eq</sub> DKHLKF <sub>rh vi</sub> SHELDSASSEVN-----                                              |
| Artiodactyla(b)      | DHKSE-EDK <sub>hr</sub> LKIRISHELDS <sub>ta</sub> SSEVN-----                                                                             |
| Rodentia             | DPKSKE <sub>de dte</sub> X <sub>yh</sub> LK <sub>ifm</sub> R <sub>iv</sub> SHE <sub>li ed</sub> S <sub>sa</sub> SSE <sub>va</sub> N----- |
| Artiodactyla(a)      | dn <sub>pls</sub> KSE <sub>(E)</sub> ED <sub>tk</sub> HLK <sub>fl</sub> RVSHLDSASSEVN-----                                               |
| Lagomorpha(+similar) | edPKSxEE <sub>de ke</sub> HLKFRVSHL <sub>de</sub> S <sub>at</sub> SSE <sub>avi</sub> N-----                                              |
| Eutheria(various)    | DPKSE-EDKHLKFRVSHLDSASSEVN-----                                                                                                          |
| Afrotheria,Xenarthra | DPKSEEDKHLKFR <sub>ti</sub> SHELESxSxExN-----                                                                                            |
| Perissodactyla       | DRKSEDEDKYLKFR <sub>TS</sub> HESESASSEVN-----                                                                                            |
| Chiroptera           | DP <sub>qk</sub> SEEQDKHLKFRISHELESASSEVN-----                                                                                           |
| Primata              | DPKSKEEDKHLKFRISHELDSASSEVN-----                                                                                                         |
| Reptilia(b)          | DHHSVE <sub>xx</sub> SxEDHHSVE <sub>dh</sub> H <sub>dh</sub> S <sub>iv</sub> EDNEV <sub>it</sub> L---                                    |
| Aves(1)              | -----SNQTL <sub>ES</sub> AEDAEDRHSIENNEVTR---                                                                                            |
| Reptilia(a)          | -----SNQTAES <sub>tav</sub> EDIQDHHS <sub>il</sub> EDNEV <sub>ti il</sub> ---                                                            |
| Aves(3)              | -----SNQTL <sub>ES</sub> AEDS <sub>QDR</sub> HSIESNEVTL---                                                                               |
| Aves(2)              | -----SNQT <sub>x</sub> ESAED <sub>xQD</sub> <sub>xx</sub> SIK <sub>x</sub> NEV <sub>xx</sub> ---                                         |
| Aves(4)              | -----SNQTL <sub>ES</sub> AED <sub>as qr</sub> D <sub>hr</sub> HSIENNEVTL---                                                              |

**Table S2.1. Alignment of canonical sequences.**

|                                                                  |                                                                                                |
|------------------------------------------------------------------|------------------------------------------------------------------------------------------------|
| XM_015411327.1:Gecko japonicus(Reptilia,Squamata)                | MKIAVLCCLCLFT---IAFALPIKTKKFDHG-AGSSEDNHDSSRGHHVHKHRRHHHHHSQSQSEHSPHEHVNSHES---QEH-----Q---LP- |
| NW_013658771.1:Thamnophis sirtalis (Reptilia,Squamata)           | MKIAVLTLCCLFT---VAFALPISQSRDHDN-SMSAESKDKSKENEAAHHHHH---HHHSHSH--- -----EHSQESPEH-----HSQESS-  |
| XM_003205565.3:Meleagris gallopavo (Aves)                        | MKLALLLCLCFIS---IAAANPVSKSKQHAI-SASSEKYDPRSHHHHRYHQ-----DHDVDSQ--SQEHLQQT-----RNDLDSL-         |
| NM_001323234.1:Coturnix japonica (Aves)                          | MKLTLCLCFIS---ITAAANPVSKSKQHAI-SASSEKYDPRSHHHHRYHQ-----DHDVDSQ--SQEHLQQT-----QNDLDSL-          |
| XM_010218705.1:tinamus guttatus (Aves)                           | MKVAVLCLCFIS---ITIAWPLSKSKQHAV-SASSEKYDARGHQSHRHH-----HVTSQ--SLENLLLP-----REDLALP-             |
| XM_013190510.1:Anser cygnoides domesticus (Aves)                 | MKVTVLCLCLIS---VAAANPI-KSKQHAI-SASSEKYDPRGHSHRQHH-----DLVNSH--SQELQLHP-----QNDLDSL-            |
| NW_017728948.1:Crocodylus porosus (Reptilia,c+t)                 | MKIAVLCCLLIG---IAFALPVNKSQHQP-SSSEERDDSRSHH---RHHH-----HVQIE--SRVSPRAA-----QEVHVLV-            |
| XM_007066639.1:Chelonian mydas (Reptilia,c+t)                    | MKIAVLCCLLIS---IAFALPVSKSKHAI-SESSEDNHDSSRHSHRHHH-----QQVHTQ--SRVRPAKT-----QELLVPP-            |
| NM_001124267.1:Oncorhynchus mykiss (Fish)                        | MKAAIVFVLLFA---TVLGRPAIRSPGNP-ESLEELVKPAVLGIAP-----AELTEVAVQNVDTAT-----                        |
| NW_018128285.1:Monopterus albus (Fish)                           | MKVAIVTVLLFA---TVLGGVPRKASVRS--ESSEEVVRRPAVPAIRKQA-----AVVQSGRAAHPVQVAAAA                      |
| XM_001370458.3:Monodelphis domestica (Marsupialia)               | MRTAVICFCLLG---IVSALPVKH---QINGSGSEERLYN-KHP-----NLVATWLNADPSQKQTLA-                           |
| XM_003772957.3:Sarcophilus harrisi (Marsupialia)                 | MRTAVICFCLLG---IVSALPVKQ---QINGSGSEEKQLYS-KHP-----NFVATWLNADPSQKQTLA-                          |
| XM_004681418.2:Condylura cristata (Lagomorpha et al)             | MRIAIVCFCLLG---IVSALPVKQ---GDSGSSEKQ-----DAVATWLKPPDPSHQQTLA-                                  |
| XM_003985184.5:Felis catus (Carnivora)                           | MRIAIVCFCLLG---IAYALPIKQ---TDSGSSEEKQLYN-KYP-----VAVATWPKPDPSPKQOTFLA-                         |
| NM_021702336.1:Neomonachus schauinslandi (Carnivora)             | MRLAIVCFCLLG---IAYALPIKQ---ADSGSSEK-----LNN-KYP-----DAVATWLKPPDPSQKOTFLT-                      |
| XM_020876412.1:Odocoileus virginianus texanus (Artiodactyla,c+b) | MRIAIVCFCLLG---IASALPVKQ---TSSGSSEEKQLNN-KYP-----DAVATWLKPPDPSQKOTFLA-                         |
| XM_005972457.1:Pantholops hodgsonii (Artiodactyla,c+b)           | MRIAIVCFCLLG---IASALPVKQ---TSSGSSEEKQLNN-KYP-----DAVATWLKPPDPSQKOTFLA-                         |
| XM_012523397.2:Dasybus novemcinctus(Cingulata)                   | YARPCTRLTLSSFFIFSVSKVKH---QADSGSSEEKQLYD-KYP-----DAVAAWLKPPDPSQKOTFLA-                         |
| XM_007951712.1:Orycteropus afer afer(Tubulidentata)              | MRIAIVCFCLLG---VASTFPVKR---QADSGSSEEKQLYD-KYP-----DAVATWLKPPDPSHQQTLA-                         |
| NW_001711695.1:Ornithorhynchus anatinus(Prototheria)             | MRTAVICLCLIS---IACALPVKRS---GPEANSGSSEEKQLYN-KHP-----NQLSSWLNADPSQKQALLA-                      |
| XM_003790097.3:Otolemur garnettii (Primates)                     | MRLAIVCFCLLG---IAYTLPVKH---VDSGSSEEKQFYN-KYP-----DAVATWLKPPDPSQKQALLA-                         |
| NW_016536240.1:Manis javanica (Afro+Xen)                         | MRIAIVCFCLLG---IACTLPVKQ---ADSGSSEEKQLYN-KYP-----DAVASWLKPPDPSHQQTLA-                          |
| D11411.1:Oryctolagus cuniculus (Lagomorpha et al)                | MRIAIVCFCLLG---MAYALPVKH---ADSGSSEEKQLYH-KHP-----DALATWLNADPSQKQALLA-                          |
| XM_006198167.2:Vicugna pacos (Artiodactyla,ccs)                  | MRLAIVCFCLLGI---ASALPVGQT---NSGSSEEKQLNN-KYP-----DAVATWLKPPDPSQKOTFLA-                         |
| XM_014787875.1:Ceratotherium simum simum (Perissodactyla)        | MRIAIVCLCLLGI---AYALPVQO---NSGSSEEKQLYN-KSP-----DAVGTWLKPPDPSQKQALLA-                          |
| XM_014842441.1:Equus asinus (Perissodactyla)                     | MRIAIVCLCLLGI---AYALPVNQ---A---DSGSSEEKQLYN-KHS-----DAVSIWLKPPDPSQKQALLA-                      |
| XM_016213045.1:Miniopterus natalensis (Chiroptera)               | MRAAIVCFCLLGI---AYALPVK---RA---DSGSSEEKQLYH-KHP-----DAVATWLKPPDPAKQALLA-                       |
| KB104739.1:Myotis davidii (Chiroptera)                           | MRIAIVCFCLLGI---TSALP-VKHA---DSGSSEEKQLYN-KHP-----DAVATWLKPPDPSQKQALLA-                        |
| XM_012559624.2:Trichechus manatus latirostris (Afro+Xen)         | MRIAIVYFCLLGI---AYALPVKHQ---ADSGSSEEKQLYS-KYP-----DAVDTWLKPPDPSYKQIALLA-                       |
| JH171653.1:Heterocephalus glaber (Rodentia)                      | MRIAIVCFCLLGI---TYSLPVQ---ADSGSSEEKPLYN-KLP-----EAVSSWLKPPDPSQKQALLA-                          |
| XM_020154612.1:Castor canadensis (Rodentia)                      | MRIAIVFCLLGI---AYSALPVK-Q---PDSGSSEEKQLFNKHA-----DAVAIWLKPPDPSQKQALLA-                         |
| NM_001040058.1:Homo sapiens (Primates)                           | MRIAIVCFCLLGI---TCALPVK-Q---ADSGSSEEKQLYN-KYP-----DAVATWLNADPSQKQALLA-                         |

|                                |                                                                                                                               |
|--------------------------------|-------------------------------------------------------------------------------------------------------------------------------|
| Gecko japonicus                | SHQSSDSEDES-EEITEQQT---LVHPD-----KSAEDDHSVDVDDHDDVDDVDD-----DSHGAEADDSDESSESDDSHQ-VVTEVPTDRP-FT---PSAAPG---PF----             |
| Thamnophis sirtalis            | QLNSQSSSEDR-DEITEQQT---LASS---KSHEDD---DDHSDVSKDD-----DHSDDSDSSESSESHE-TVTDAPTEAP-YT-----E---SV----                           |
| Meleagris gallopavo            | QQTHYSSEEN-ADVPEQPDF---PDIPS-----KSQEAV-----DDND-----DDNSNDTDESDE-VVTFDFTEAP-VT-----PF----                                    |
| Coturnix japonica              | QQTHYSSEEN-ADVPEQPDF---PDVPS-----KSQETV-----DDDD-----DDNSNDTDESDE-VVTFDFTEAP-VA-----PF----                                    |
| Tinamus guttatus               | QKTLYSSEER-ADVLVPERF---PAVFS-----KSHEDP-----DDD-----VDDNSNDADESDE-VVTFDFTEAP-VT-----AAFPPY---PF----                           |
| Anser cygnoides domesticus     | QKTLYSSEENAEVNPVKPHF---PDVPS-----KSHEAV-----DDDN-----DDDDNSNDTDESDE-VVTFDFTEAP-VT-----APSPFF---PF----                         |
| Crocodylus porosus             | QQTSFSSSEES-VEVPKRQIF---QVAS-----RSTESE-----D-----DQDDSDTDESDEDAVTLPTDFP-VT---ETFPFF---PP----                                 |
| Chelonian mydas                | QQSHFSSSEES-VENTEQQL---PKPAS-----VSNEDD-----GD-----HDDNSNDTDESDEDAVTVYFPTEAP-VT---TPLTPA---VP----                             |
| Oncorhynchus mykiss            | -TSDESSDK-DETEGADPTS---DPTSADSADS-----A-----D-SADSADSDTDESSESSEADTAAPATAE-----PTVEPTMATTEAP-                                  |
| Monopterus albus               | TDSDSEKGSSEDESIVVTT-DGTNTALASDTTSDKSKDSG---DDDDD---DNDDETK-----ETEDESSESSES-STLAPATDTPVITDEDEVAETTVETPI                       |
| Monodelphis domestica          | TQNSVSSEES-TEDLQQ-TL---PSNSN-----ESPDTDDVDDDD---DDGKHS-----TSDSDSDESDE-VVTFDFP---TD---IPTSS-FLPDGPT-                          |
| Sarcophilus harrisi            | TQNSLSEES-TEDLQE-TL---PRNSS-----ESPDDIDDDDD---GDH-NKS-----ISPDDSDDESDE-VVTFDFP---TD---TPATPS-FLPDGPT-                         |
| Condylura cristata             | PQNSVSSEET-DNFKQE-TL---PSVSD-----ESN---DVDDVD---DGDNTERSDTSDS---DDHSDSDSDESSESDE-MATDSP---TD---LPATVDF-YTPVVFT-               |
| Felis catus                    | LQNAVLSSEET-DDFKQK-TL---ASKSN-----ESHVDV---DED---DEDDVDSQDSVSDSHDITD-----DSDNSQSDSESDE-LVTFDFP---TD---VPATQV-FTPAVPT-         |
| Neomonachus schauinslandi      | -QNTVLSQEN-DNFKQK-TL---SSKSN-----ESHEDV---DED---DGDVDSQDSIDSNDVD-----DSDNSQSDSESDE-LVTFDFP---TD---IPATQF-FTPAVPT-             |
| Odocoileus virginianus texanus | PQNSVSSEET-DDNKQK-TL---PSKSN-----ESPEQIDDLDDDD---DENSQDVT---NDSDDTDDSDSHSNESHHSDESDE---ADFP---TD---VPTIATV-STPPIPT-           |
| Pantholops hodgsonii           | PQNSVSSEET-DDNKQK-TL---PSKSN-----ESPEQIDDLDDDD---DENSQEVNS---DDSSD-ANPDDSDSHSNESHHSDESDE---ADFP---TD---IPTIATV-FTPPPT-        |
| Dasybus novemcinctus           | PQNAVLSSEET-DNFKQK-TL---PSKSN-----ESHHTDNADDEB---DGDHVDSDSDSDE---SDHNDDPDHSDSHHSDESDE-VVTFDFP---TD---APATP-VVPT-              |
| Orycteropus afer afer          | SQNTLSSEET-DDLKQE-TL---PSKSN-----ESLDQTDVDDDEB---DGDHVDSDSDESSED---H-DHTDDPYHSDSHHSDESDE-LVTFDFP---TE---VPATPV-FTPAVPT-       |
| Ornithorhynchus anatinus       | PQNLVSSEES-KENIQQT---PSISN-----ESHDDVDDADDQDD---DENSQEVNS---SDHKDESDDSDDESDE-VVTFDFP---TD---VPATV-FTPAAPT-                    |
| Otolemur garnettii             | PQNTVLSSEET-DNFKQK-TL---PSSTN-----ESHDMDDDDDD---HVD---SHSDSDSDTNDPDDSHHSDESSESDE-MV-----TA---NFPDTPV-PPTPPT-                  |
| Manis javanica                 | LQNAVLSSEET-DNFKQE-TL---PSKSN-----ESHDDVDEED---GDNRSQSDASADSDV---DHTDDPDDSDSESDE-LV-----TD---VPATPV-FTPADPT-                  |
| Oryctolagus cuniculus          | PQNAVMSSEET-DDLKQE-TL---PSKSI-----ESHDMDDIDEDED---D-DHVDNR---DSNESDADHPDSDSHHSDESSESDE-VTV-YP---TE---DAATTV-FTEVPT-           |
| Vicugna pacos                  | PQSTASSEET-DNFKQE-TL---PSTSN-----ESPDLTDDVDDDD---DD-DTVDSQD---VSDNSDDHDTDRSDSHHSDESSESDE-VVTFDFP---PTD---IPATV-FTPAVPT-       |
| Ceratotherium simum simum      | PQ-TVSSSEET-DDLKQE-TL---PSKSN-----ESPDDTDDVDDDD---DGDHVDSDSIDSDDSDTDDPDDPQSESHHSDESSESDE-LVTFDFP---PTD---LPATPV-FTPAVPT-      |
| Equus asinus                   | PQ-TVSSSEET-DNFKQE-TL---PSQSN-----ESHDDTDDVDDN---DGDHDDTDDSDSDESDTDDPDDPQSESHHSDESSESDE-LVTFDFP---STD---VPATPV-FTPAVPT-       |
| Miniopterus natalensis         | PQNTVLSSEET-DDFKQE-TL---PSTSN-----ESHDLTDDVDDDD---DSDNHVDSQDSDSDSDSDADQTDSDSDSDSHHSDESSESDE-LVTFDFP---PTD---FPGLTI-VTPPVPT-   |
| Myotis davidii                 | PQNTVLSSEET-DDFKQE-TL---PSQSN-----ESQDHTDDVDDDD---DGDHVDSDSIDSNSDSDDDHTDDPDDSDSDSHHSDESSESDE-LVTFDFPPTDPTD---FPPTP-ATPAAPT-   |
| Trichechus manatus latirostris | PQNAVMSSEET-DDLKQE-TL---PSKSS-----ESQDQSDSVDDE---DGEQVDSQDIDSDDTDDHDDTDDSDSDSHSNESHHSDESSESDE-LVTFDFP---PTD---DPATSV-FTPAVPT- |
| Heterocephalus glaber          | PQNSVSSEET-DDLKQE-TL---PSNSN-----ESHDMDDVDDDD---GDQD---SVDVDDDDHPDSDSHHSDESSESDESSESDE-VVTD---PTN---GPETPV-FTPIVPT-           |
| Castor canadensis              | PQNVVSSEET-DDIKQK-TL---PSNSN-----ESHDMDDMDDE---DGDHVDSDSVDSDSDSDTDDPDDSDSHHSDESSESDESSESDE-LFTSS---PTD---NPGTQV-FTPVVPT-      |
| Homo sapiens                   | PQNAVMSSEET-DNFKQE-TL---PSKSN-----ESHDMDDMDDE---DGDHVDSDSIDSNDSDVDDTDDSHQSDSHHSDESSESDE-LVTFDFP---PTD---LPATEV-FTPVVPT-       |

Gecko japonicus -----TGRGDI--PYGIQHQQ-----LKFRLRKSXSSEQFDSHDTTQE--DLSLPDVDSHET-----HSSKAVSHESQDTSTES
Thamnophis sirtalis -----TNRGDVP-SDEFRPNVDFM-----SLGRS-----GKFDSQSVSDE--VDSTPDDESHED-----SKARSLESHE---S
Meleagris gallopavo NRGDNAGRGSV-AYGFRAKA-----HMVKASKLRKTARKLIEDDATABA-----GGSQ-----LAGLW
Coturnix japonica NRGDNAGRGSV-AYGFRAKA-----HVVKASKIRKAARKLIEDDATTED-----GDSQ-----PAGLW
Tinamus guttatus TRGDNAGRGSV-AYRIKAEP-----AVMKPSKLHKAARKLMVHDVTEE--DLSALAADSHQEGFSREAFG-AHRSAEKYADSLWE
Anser cygnoides domesticus TRGDNAGRGSV-AYRMKAKA-----SMVKSSKLRKAARKLIEDDATEE--DESALHGDSSQVGLWQKELA-AHRAPGKRAVSGEW
Crocodylus porosus TRGDNSGRGSV-GYRMRKAKLV-----KSSRHYQATGKFIIVHDATEE--DDSTPDTESSQVLDYKPLPA-AHLVPGKYDISVEW
Chelonian mydas TRGDNSGRGSV-AYRMRKAKLV-----DIY-HKEKSSKLYKALGKFIIVHDVTEE--DDSTPDASQVVDSSKAPCA-ACHFPGKFDMSMEW
Oncorhynchus mykiss --IYDDGRGDSM-GYPSDYKKSIIYVDTNNIEKGPSPYKSYGKIDEGMYAGKVKVSYNTGLGNKIEKTMVFKAL--QVHDLMEE-DTSTPDVSEQVLDASSGKAEESMRKAHVVDVAV--
VTDADTGHGDNMRGYPGDY-KSIVYVEDKSYHKIPVAYKSYEFVGTGK-----KTAYDMTEGNEVEKSLKVYKAI--QVHSDLVEE-DTSTPEVESQGLDASSVTTQD--HQEGEGASP--S--
Monodelphis domestica R-GDNSGRGSV-AYGLR-SKV-----GAPDISS--AETHVTEEDLTSQ--MESYSEKAH---K-AFPLSQNLPKVSAW
Sarcophilus harrisi R-GDNGGRGSV-AYGLR-SKL-----GAPYRSS--EQVHDVTEEDLTSQ--IESYSEKTH---K-AIPLSQTPFKVSSW
Condylura cristata R-DTYDGRGDSV-AYGLK-SKS-----IKFYSAE--DQYDPATKEDLASQ--MESREMRNGP--K-ATLVALNQLQSTSDV
Felis catus R-DSYDGRGDSV-AYGLR-SKS-----KKSRYE--DQYPDSTEEDFTSL--VKSQSMEDDF--N-AVLLSHTVRRSPDR
Neomonachus schauinslandi R-DSNDGRGDSV-AHGLR-SRS-----KKSRYE--VQYPDSTEEDLTSQ--VKSSEMEDDF--N-AVLLSHTVRRSPDR
Odocoileus virginianus texanus E-NTNDGRGDSV-AYGLK-SKS-----KKFRSS--IQSPDATEEDFSSH--VESEEMHDAP--K-K-----
Pantholops hodgsonii E-STNDGRGDSV-AYGLK-SKS-----KKFRSS--IESPDATEEDFTSH--IESEEMHDAP--K-K-----
Dasypus novemcinctus E-DAYNGRGDSV-AYGLR-SKS-----KLYRSK--IQFPDATEEDLTSQ--MEREGLDDAH---R-VIHVARRLNRSADW
Orycteropus afer afer V-ETYDGRGDSV-ASRLK-SKS-----KKIYRSV--IQYDDTE-ELTSH--MRSKELDDVDP--K-AISVVHVLKRSADW
Ornithorhynchus anatinus R-GDNGGRGDRV-YRGLK-TKP-----GVLYKAA--VQGH--ASDDFTSR--LESLESDSP---E-AYPDAHKLQKSSEW
Otolemur garnettii E-NIYDGRGDSI-PYGLR-SKS-----KKFRRLD--IQIPDETQEDFTSY--VESEELGHGP--K-VIAPNQGLKVPDDL
Manis javanica G-DTNDGRGDSV-AYGLR-SKS-----KKFYRSA--LQYDPATEEDLTSQ--MESKEDDKAR--K-ATLVAQGLHVPSDW
Oryctolagus cuniculus V-ETYDGRGDSV-AYRLKRSKS-----KMFHVSN--AQYPGASEEDLSSH--VSEDLDDTP--R-AIPVAQHLNVPDSDW
Vicugna pacos EDT-QDGRGDSI-GYALR-TKS-----KKFRRSE--VEHPEAM---TH--VESEEADEAH---K-AIFPAQGLHTASDW
Ceratotherium simum simum SDT-YDGRGDSV-GYGRP-SKS-----KKVRRSE--VQYDPATEEDLTSQ--VKSKEVGGVH--K-ALLVAQGLHVASDW
Equus asinus RDT-YDGRGDSL-SYGLK-SKS-----RKFRRSE--DQYDPATEEDLTSQ--VESKIDDDVH---K-AVLVAQGLHVASDW
Miniopterus natalensis RDT-YDGRGDSV-AYGLK-SKS-----KKFHRPA--AQYDPATEEDLTSQ--VESNEADEAH---K-AVLVAQGLHVASDW
Myotis davidii IDT-NDGRGDSV-AHGLR-LKS-----KLLHRSV--VQYDPATEEDLTSQ--MREGLDDAH---R-AVLVAQGLHVASDW
Trichechus manatus latirostris VDT-YDGRGDSV-VYRLR-SKS-----KKIPRSD--IQHPHATEEDSISQ--MESKMLDDAH---K-AIPVLSISLKKPFDW
Heterocephalus glaber VETYD-GRGDSL-AYGLR-SRS-----KKFHISD--PQYPAATDKDLTSN--VESQESSDAQ---K-AVLVAHRLNMPDSDW
Castor canadensis VEV-YDGRGDNV-AYGLR-SRYL-----KKFDISD--AQFSDATEEDLTSQ--IESEESDDAL---K-AIPVAQHLKVPDSDW
Homo sapiens VDT-YDGRGDSV-VYGLR-SKS-----KKFRRPD--IQYDPATDEDITSH--MESEELNGAY---K-AIPVAQDLNAPSDW

Gecko japonicus EDKS-NLQDSNEVHS-----ASHDKSVENDSRQKL--DSVEEDH-----DNSKADISQESDGDHITELKAR-----RGEPO---
Thamnophis sirtalis DDKS-DLTDNEVHS-----ASHDISLEDHSPEKP--ESVEDS--S-DHSKASLSLESTE--SREQKKDH-----SEEPQ---
Meleagris gallopavo WPKESREQDSREL-----TQHQSVENDSRPRF--DSPEVDGG--D-SKASAG-----VDSRESQ---
Coturnix japonica WPKESREQDSREL-----PQHQSVENDSRPRF--DSPEVDGG--D-SKASAG-----VDSRESQ---
Tinamus guttatus GDKS-HGHSNEVGR-----KLPERSLKDSRQKF--DSDPERD--S-GEWGARGDSPPS--RESRESQA---
Anser cygnoides domesticus LDKS-HERSDSELTH-----HQSMENTSROKF--DSPEVEGG--D-SQDGARGDGRHS-----LESRRERV---
Crocodylus porosus DDKS-HMKDSNEVTS-----RSRDD--SHQRL--ESIEVDRD--D-SNPDVPEDSHMSNESREHQHTQ-----I---
Chelonian mydas DDSS-NIQDISSEVNT-----RSHDKSMENGSQQQL--DSVEADSD--N-SKPDVTEDSHMSNESTEQQAQ-----TEDLQ---
Oncorhynchus mykiss -----QDRTPSESPE-----SQKAKSLESDA-----TSELTSSASSDGTSESTSTASNETDSSNSEEATARPGAAD-----SDSAESNESHD
Monopterus albus -----DA-----TTSTP-----EEEEEE-----EESASTSQESEDKESQSSEATVTPGAAD-----SDSDESDESDE-
Monodelphis domestica G---SNSKESNEA-----SHP-DEY--SVETYSHEQF--KSYQLEETNP-----D--SQQQ-----QENDKVSQEFR---
Sarcophilus harrisi E---SNGQESNEA-----SQA-DEY--SVETHSHEQL--KSSQLERNIY-----D--SQQQ-----QENDKVSQEFHREVDNRD---
Condylura cristata D---SQGEDSFKE-----RDD--SLENNGFHES--QEYKLLKAND-----E--SSQ-----KTPESHLSH---
Felis catus D---SHVKDSQET-----SQV-DDH--SMETKSRKHS--KEYLKLKASD-----E--SNKHS-----HEIGS--QESSDISSELV---
Neomonachus schauinslandi D---SHAKDSQET-----SQP-DDH--SMETKSHKHA--REYKLRASD-----E--SNKHS-----HEIGS--QENSEVSELV---
Odocoileus virginianus texanus -----T-----SQL-NDH--SKETNSSELS--KELPKAKD-----E--SNKHS-----DVIES--QENSQVKS---
Pantholops hodgsonii -----T-----SQL-TDH--SEETNSNELS--KELMPKAKD-----E--SKHS-----NLIES--QENSKLS-----
Dasypus novemcinctus D---SHGKDSQET-----RQL-DDH--SVETHSHEQS--KSRKA--SH-----E--SNEHS-----DVIDS--RENSKVSHEFN---
Orycteropus afer afer D---SHPQDSHEV-----SQLEISH--SVETHSHEQS--KELBA--KD-----E--SNERS-----DMIDS--QEISKVSHEFH---
Ornithorhynchus anatinus H---SNEASHQDDRRMQKSEWHSSEASHQ-DDR--SVETHSHEEA--KGYRLKQED-----H--SSQQD-----QESYKVSRENDSQEKTAQDA
Otolemur garnettii D---SHETSDDL-----STETHSK-----EPSDMIVS--QESHVSLV-----
Manis javanica D---SQ-----ET-----SQL-DDQSQAETNSQGYG--KEYTLKAND-----E--SNEH-----ADVIGN--KEDSKVSQE-----
Oryctolagus cuniculus D---SQEKDSHDV-----SQV-DDH--SVETQSHEQA--RQYKREAND-----N--SVEH-----SHSIDS--QESSKVSQES-----
Vicugna pacos N---SQWKDSQET-----SQP-GDH--SVETHSHEQS--EYKLLKADD-----E--GDRHS-----DVVDS--QENSQVSPFHSQELP---
Ceratotherium simum simum D---SRGKDSLET-----SQL-DDH--SVETHSLEHS--KEYLKLKAND-----E--TSEHS-----DVIDS--HENSFKFSHERHSQEFH---
Equus asinus D---SRGKDSQET-----SQL-DDH--SVETHSREHS--KEYLKLKAND-----E--TSEHS-----DVIDS--LENSKVSQEFPSQEFH---
Miniopterus natalensis D---SHGRESQEI-----SLL-DDH--SVETHSLKLP--KEYQLKAIG-----Q--SNEHS-----DGIDS--PENVKISHFHSQELG---
Myotis davidii D---SRGKDSQET-----SQL-DDH--SVETHSHELA--KGYKLLKAND-----A--SNEHS-----VGIDS--QENSRVQEFHSRELQ---
Trichechus manatus latirostris D---SYQDSRET-----SQQ-DDH--SVETHSHEQY--KVYKLLKAM-----V--SSEHS-----DTIHS--QEDSRVSDHL-----
Heterocephalus glaber D---SRGKDSHES-----SQL-DDP--SVETHSHEQS--REHKRKARN-----D--SSEHS-----DVIDS--QEGARASQELHSQEFPP---
Castor canadensis D---S-----HES-----SQL-DDH--SVETHSREQS--REHKQKASH-----E--SREHS-----DVIDS--QESSKVSQEVHSHEST---
Homo sapiens D---SRGKDSYET-----SQL-DDQ--SAETHSHKQS--RLYKRRKAND-----E--SNEHS-----DVIDS--QELSKVSREPHSHEFH---

|                                       |                                                                     |
|---------------------------------------|---------------------------------------------------------------------|
| <i>Gecko japonicus</i>                | -EADHDHDVDND-----HHSVEDNEIEY-----                                   |
| <i>Thamnophis sirtalis</i>            | -QLDS--NPDDASNQTVESAESQHSS-----EDHHSVEHHDSVEDNEV-----IL             |
| <i>Meleagris gallopavo</i>            | ---GSVPAVDTSNQTLESA-----EDAEDRHSIENNEVTR                            |
| <i>Coturnix japonica</i>              | ---GSVPAVDASNQTLESA-----EDAEDRHSIENNEVTR                            |
| <i>Tinamus guttatus</i>               | RVSAAE-VPDGDNSNQTLESA-----EDAQDHLISIKHNEVIF                         |
| <i>Anser cygnoides domesticus</i>     | SAASAIPTIDDTSNQTLESA-----ENAREHHSIENNEVTI                           |
| <i>Crocodylus porosus</i>             | --SASLPETDADSNQTAESV-----EDIQDHHSLLEDNEVTI                          |
| <i>Chelonian mydas</i>                | -QVDVVPEVND-SNQTAESE-----EDTQDHSSIEDNEVIL                           |
| <i>Oncorhynchus mykiss</i>            | SDSDSAEEAATVATITTDAP-----IVITAK-----                                |
| <i>Monopterus albus</i>               | --S-----EGTGPDATTDTP-----LVITAK-----                                |
| <i>Monodelphis domestica</i>          | -----TQ-----EVNKL--SQEFQSQESHVPN-----DPESVENTKYLKLHSFP--EADSASYEAH  |
| <i>Sarcophilus harrisii</i>           | -----SQEFHKQ---QVGKL--SQEYHSQEVHLS-----DPESVENIKPLKLS-H--EVDSASFETH |
| <i>Condylura cristata</i>             | -----SQEFHNQEEKLDL-----DPKSVEEDTHLKFRVSH--ELDSTSSEVN                |
| <i>Felis catus</i>                    | -----GQTVQSNKELVQ-----HPSEEQDKHLKFRVSH--ELDSASSEVN                  |
| <i>Neomonachus schauinslandi</i>      | -----SQIVQSHEKERV-----DKSVEDKHLKFHISH--ELDSASSEVN                   |
| <i>Odocoileus virginianus texanus</i> | -----QEFHSLKLDL-----DHRSEEDKHLKIRISH--ELDSTSSEVN                    |
| <i>Panholops hodgsonii</i>            | -----QEFHSLKLDL-----DHKSE-EDERLKIRISH--ELDSASSEVN                   |
| <i>Dasypus novemcinctus</i>           | -----SQESHSHEDKLV-----GPKSKEDKHLKFHTSH--ELESASSEIN                  |
| <i>Orycteropus afer afer</i>          | -----SQEFHSQEDKPHR-----DPKSVEEQHLKFRVSH--ELDSASFETN                 |
| <i>Ornithorhynchus anatinus</i>       | -----DSDEFNRKHYLKSHTSH--EFDSASSETH                                  |
| <i>Otolemur garnettii</i>             | -----T--SH---E-----DLESKEDKLLKFRVSH--ELDSASSEVN                     |
| <i>Manis javanica</i>                 | -----FSHEDKLVF-----DPKSREED-KLKFHTSH--ELDSASSEAN                    |
| <i>Oryctolagus cuniculus</i>          | -----Q--SREFRSHEDKLAI-----EPKSEEDEHRLRVSH--ELDSTSSEIN               |
| <i>Vicugna pacos</i>                  | -----SHEDKLV-----DPKSEEDTHLKFRVSH--ELDSASSEVN                       |
| <i>Ceratotherium simum simum</i>      | -----SREDKLV-----DRKSEEDKYLKFRVSH--ELDSASSEVN                       |
| <i>Equus asinus</i>                   | -----SSEGKLV-----DRKSEDEKYLKFRVSH--ESESASSEVN                       |
| <i>Miniopterus natalensis</i>         | -----SYEDKPAL-----HPKSEEQDKHLKFRVSH--ELESASSEVN                     |
| <i>Myotis davidii</i>                 | -----SHEDKLV-----DPKSEEQDKHLKFRVSH--ELESASSEVN                      |
| <i>Trichechus manatus latirostris</i> | -----SREDKYYP-----DPKSEEDKHLKFRVSH--ELES-----                       |
| <i>Heterocephalus glaber</i>          | -----SH---E-----DPKSEEDKHLKFRVSH--ELDSVSSEAN                        |
| <i>Castor canadensis</i>              | -----SLEDKPV-----DPKSQEKDKHLKFRVSH--ELDSASSEVN                      |
| <i>Homo sapiens</i>                   | -----SHEDMLV-----DPKSKEDKHLKFRVSH--ELDSASSEVN                       |

**Table S2.2. Alignment of representative sequences.**

**Table S3: Predicted osteopontin sequences in birds.** For most avian osteopontin sequences, a long (complete) and short form of the protein are predicted. The records that have NM\_ or XM\_ 6 or 12+ digit formats, are reference sequences (RefSeqs), which are curated from single or multiple sequence records that have been directly submitted to GenBank. KK and KL indicate NCBI CON division sequences. JJ are Genbank GSS sequences.

| <b>bird</b>                            | <b>complete</b> | <b>short</b>   |
|----------------------------------------|-----------------|----------------|
| <i>Acanthisitta chloris</i>            | XM_009073853.1  | KK835285.1     |
| <i>Apaloderma vittatum</i>             | XM_009868641.1  | KL382114.1     |
| <i>Aptenodytes forsteri</i>            | XM_009280227.1  | KL226085.1     |
| <i>Balearica regulorum gibbericeps</i> | XM_010311221.1  | KL502968.1     |
| <i>Buceros rhinoceros silvestris</i>   | XM_010145609.1  | KL509681.1     |
| <i>Calypte anna</i>                    | XM_008500834.1  | KL218525.1     |
| <i>Caprimulgus carolinensis</i>        | XM_010173470.1  | KL358285.1     |
| <i>Cariama cristata</i>                | XM_009694723.1  | KK508828.1     |
| <i>Chaetura pelagica</i>               | XM_009993754.1  | KN125683.1     |
| <i>Charadrius vociferus</i>            | XM_009890748.1  | KL873122.1     |
| <i>Chlamydotis macqueenii</i>          | XM_010119303.1  | KK749833.1     |
| <i>Colius striatus</i>                 | XM_010202192.1  | KK544289.1     |
| <i>Corvus brachyrhynchos</i>           | NW_008240042.1  | KK719673.1     |
| <i>Cuculus canorus</i>                 | XM_009559526.1  | KL447603.1     |
| <i>Egretta garzetta</i>                | XM_009639993.1  | KK501660.1     |
| <i>Eurypyga helias</i>                 | XM_010154680.1  | KK572170.1     |
| <i>Fulmarus glacialis</i>              | XM_009584852.1  | KK609601.1     |
| <i>Gavial stellata</i>                 | XM_009813620.1  | JJRM01070990.1 |
| <i>Haliaeetus albicilla</i>            | XM_009916485.1  | KK651471.1     |
| <i>Leptosomus discolor</i>             | XM_009958978.1  | KK689572.1     |
| <i>Manacus vitellinus</i>              | XM_008930247.2  | KL672548.1     |
| <i>Merops nubicus</i>                  | XM_008942236.1  | KK707889.1     |
| <i>Mesitornis unicolor</i>             | XM_010181850.1  | KK807537.1     |
| <i>Nestor notabilis</i>                | XM_010019624.1  | KK945799.1     |
| <i>Nipponia nippon</i>                 | XM_009467655.1  | KL409714.1     |
| <i>Opisthocomus hoazin</i>             | XM_009932280.1  | KK734416.1     |
| <i>Pelecanus crispus</i>               | XM_009490811.1  | KK496753.1     |
| <i>Phaethon lepturus</i>               | XM_010287426.1  | JJRF01066258.1 |
| <i>Phalacrocorax carbo</i>             | XM_009512482.1  | KL444864.1     |
| <i>Picoides pubescens</i>              | XM_009904975.1  | KL216617.1     |
| <i>Pterocles gutturalis</i>            | XM_010079868.1  | KL241686.1     |
| <i>Pygoscelis adeliae</i>              | XM_009327481.1  | KL225236.1     |
| <i>Struthio camelus australis</i>      | XM_009676586.1  | KL206412.1     |
| <i>Tauraco erythrolophus</i>           | XM_009978083.1  | KL455818.1     |
| <i>Tinamus guttatus</i>                | XM_010218705.1  | KL892771.1     |
| <i>Tyto alba</i>                       | XM_009970430.1  | KK369619.1     |

|                                     |                |            |
|-------------------------------------|----------------|------------|
| <i>Anas platyrhynchos</i>           | XM_005012779.3 |            |
| <i>Anser cygnoides domesticus</i>   | XM_013190510.1 |            |
| <i>Apteryx australis mantelli</i>   | XM_013957376.1 |            |
| <i>Aquila chrysaetos canadensis</i> | XM_011600806.1 |            |
| <i>Calidris pugnax</i>              | XM_014961493.1 |            |
| <i>Columba livia</i>                | XM_005498492.2 |            |
| <i>Corvus cornix cornix</i>         | XM_010412044.2 |            |
| <i>Coturnix coturnix japonica</i>   | AF239805.1     |            |
| <i>Coturnix japonica</i>            | NM_001323234.1 |            |
| <i>Falco cherrug</i>                | XM_005444503.1 |            |
| <i>Falco peregrinus</i>             | XM_005233595.1 |            |
| <i>Ficedula albicollis</i>          | XM_016297843.1 |            |
| <i>Galeopterus variegatus</i>       | XM_008574253.1 |            |
| <i>Gallus</i>                       | M59182.1       |            |
| <i>Geospiza fortis</i>              | XM_005418195.1 |            |
| <i>Haliaeetus leucocephalus</i>     | XM_010569846.1 |            |
| <i>Lepidothrix coronata</i>         | NW_016690259.1 |            |
| <i>Limosa lapponica baueri</i>      | KZ506572.1     |            |
| <i>Lonchura striata domestica</i>   | XM_021526515.1 |            |
| <i>Meleagris gallopavo</i>          | XM_003205565.3 |            |
| <i>Meleagris gallopavo</i>          | NC_015014.2    |            |
| <i>Melopsittacus undulatus</i>      | XM_005146580.1 |            |
| <i>Numida meleagris</i>             | XM_021395699.1 |            |
| <i>Parus major</i>                  | XM_015623543.2 |            |
| <i>Patagioenas fasciata monilis</i> | LSYS01006159.1 |            |
| <i>Pseudopodoces umilis</i>         | XM_005525626.2 |            |
| <i>Serinus canaria</i>              | NW_007931124.1 |            |
| <i>Sturnus vulgaris</i>             | XM_014878941.1 |            |
| <i>Taeniopygia guttata</i>          | XM_002190366.1 |            |
| <i>Zonotrichia albicollis</i>       | XM_005485296.1 |            |
| <i>Cathartes aura</i>               |                | KL320674.1 |
| <i>Phoenicopiterus ruber ruber</i>  |                | KK415766.1 |
| <i>Podiceps cristatus</i>           |                | KL257771.1 |

**Figure S1: The domain structure of osteopontin.** A search of 198 osteopontin sequences was conducted in Meme Suite with the expectation of 13 motifs (to not exceed the capacity of the software, partial sequences and two bird sequences needed to be eliminated). **A)** List of the identified motifs with statistics. Motifs with a pale red background are very similar to earlier specified motifs. The colored squares in the right column match the color coding in part B) of this Figure. **B)** Top scoring sequences, each of which has an E-value less than 10. The motif matches shown have a position p-value less than 0.0001. The hit p-value is not adjusted for the length of the sequence. Note the similarity to the domain structure identified in Figure 1.



MOTIFS

| Logo | Name                                            | Alt. Name | Width | Motif Similarity Matrix |      |      |      |      |      |      |      |      |      |      |      |      |
|------|-------------------------------------------------|-----------|-------|-------------------------|------|------|------|------|------|------|------|------|------|------|------|------|
|      |                                                 |           |       | 1.                      | 2.   | 3.   | 4.   | 5.   | 6.   | 7.   | 8.   | 9.   | 10.  | 11.  | 12.  | 13.  |
|      | MRIIVICFCLLGIAALVKQADSGSSEEKQLY                 | MEME-1    | 33    | --                      | 0.45 | 0.17 | 0.19 | 0.22 | 0.14 | 0.13 | 0.19 | 0.12 | 0.1  | 0.17 | 0.95 | 0.11 |
|      | MKVAVLCLCLISITAAWVSKSKQHAISASSEEKYDRGHSHRYHHHHV | MEME-2    | 50    | 0.45                    | --   | 0.17 | 0.16 | 0.21 | 0.24 | 0.14 | 0.13 | 0.1  | 0.16 | 0.16 | 0.83 | 0.12 |
|      | EVVTFDFTDIPATEVFTPAVTRDNDGRGDSVAYGLRSKS         | MEME-3    | 41    | 0.17                    | 0.17 | --   | 0.17 | 0.91 | 0.18 | 0.16 | 0.15 | 0.09 | 0.17 | 0.86 | 0.21 | 0.14 |
|      | NKYPDAVATWLKDPQKQFLAQNVSSEE                     | MEME-4    | 32    | 0.19                    | 0.16 | 0.17 | --   | 0.16 | 0.83 | 0.19 | 0.17 | 0.14 | 0.12 | 0.2  | 0.18 | 0.12 |
|      | IPATEVFTPAVTRDNDGRGDSVAYGLR                     | MEME-5    | 29    | 0.22                    | 0.21 | 0.91 | 0.16 | --   | 0.16 | 0.13 | 0.16 | 0.07 | 0.13 | 0.72 | 0.2  | 0.12 |
|      | QLYNPDAVATWLKDPQKQFLAQN                         | MEME-6    | 29    | 0.14                    | 0.24 | 0.18 | 0.83 | 0.16 | --   | 0.15 | 0.13 | 0.13 | 0.12 | 0.17 | 0.21 | 0.11 |
|      | PQNDLASPQQLYSSEESVDVPVPHFPDVSSK                 | MEME-7    | 33    | 0.13                    | 0.14 | 0.16 | 0.19 | 0.13 | 0.15 | --   | 0.2  | 0.16 | 0.13 | 0.13 | 0.17 | 0.12 |
|      | YPDATEDITSHVESELBDAYKAIPVAQLNVPDWDWSHG          | MEME-8    | 41    | 0.19                    | 0.13 | 0.15 | 0.17 | 0.16 | 0.13 | 0.2  | --   | 0.17 | 0.17 | 0.16 | 0.26 | 0.13 |
|      | ENSKVSHEFHSHEDKLVDPKSKKEEDKHLKFRHSHELDSASSEVN   | MEME-9    | 50    | 0.12                    | 0.1  | 0.09 | 0.14 | 0.07 | 0.13 | 0.16 | 0.17 | --   | 0.19 | 0.12 | 0.18 | 0.11 |
|      | VSAEIPDDNSNQTLSEAEADRHSIENNEVTL                 | MEME-10   | 33    | 0.1                     | 0.16 | 0.17 | 0.12 | 0.13 | 0.12 | 0.13 | 0.17 | 0.19 | --   | 0.16 | 0.1  | 0.16 |
|      | DEVVTFDFTDIPATEVFTPAVTRDNDGRGDS                 | MEME-11   | 33    | 0.17                    | 0.16 | 0.86 | 0.2  | 0.72 | 0.17 | 0.13 | 0.16 | 0.12 | 0.16 | --   | 0.19 | 0.1  |
|      | MRIIVICFCLLGIAALVKQ                             | MEME-12   | 21    | 0.95                    | 0.83 | 0.21 | 0.18 | 0.2  | 0.21 | 0.17 | 0.26 | 0.18 | 0.1  | 0.19 | --   | 0.13 |
|      | TDDFKQETLSKSNESDWDYDDEDD                        | MEME-13   | 29    | 0.11                    | 0.12 | 0.14 | 0.12 | 0.12 | 0.11 | 0.12 | 0.13 | 0.11 | 0.16 | 0.1  | 0.13 | --   |

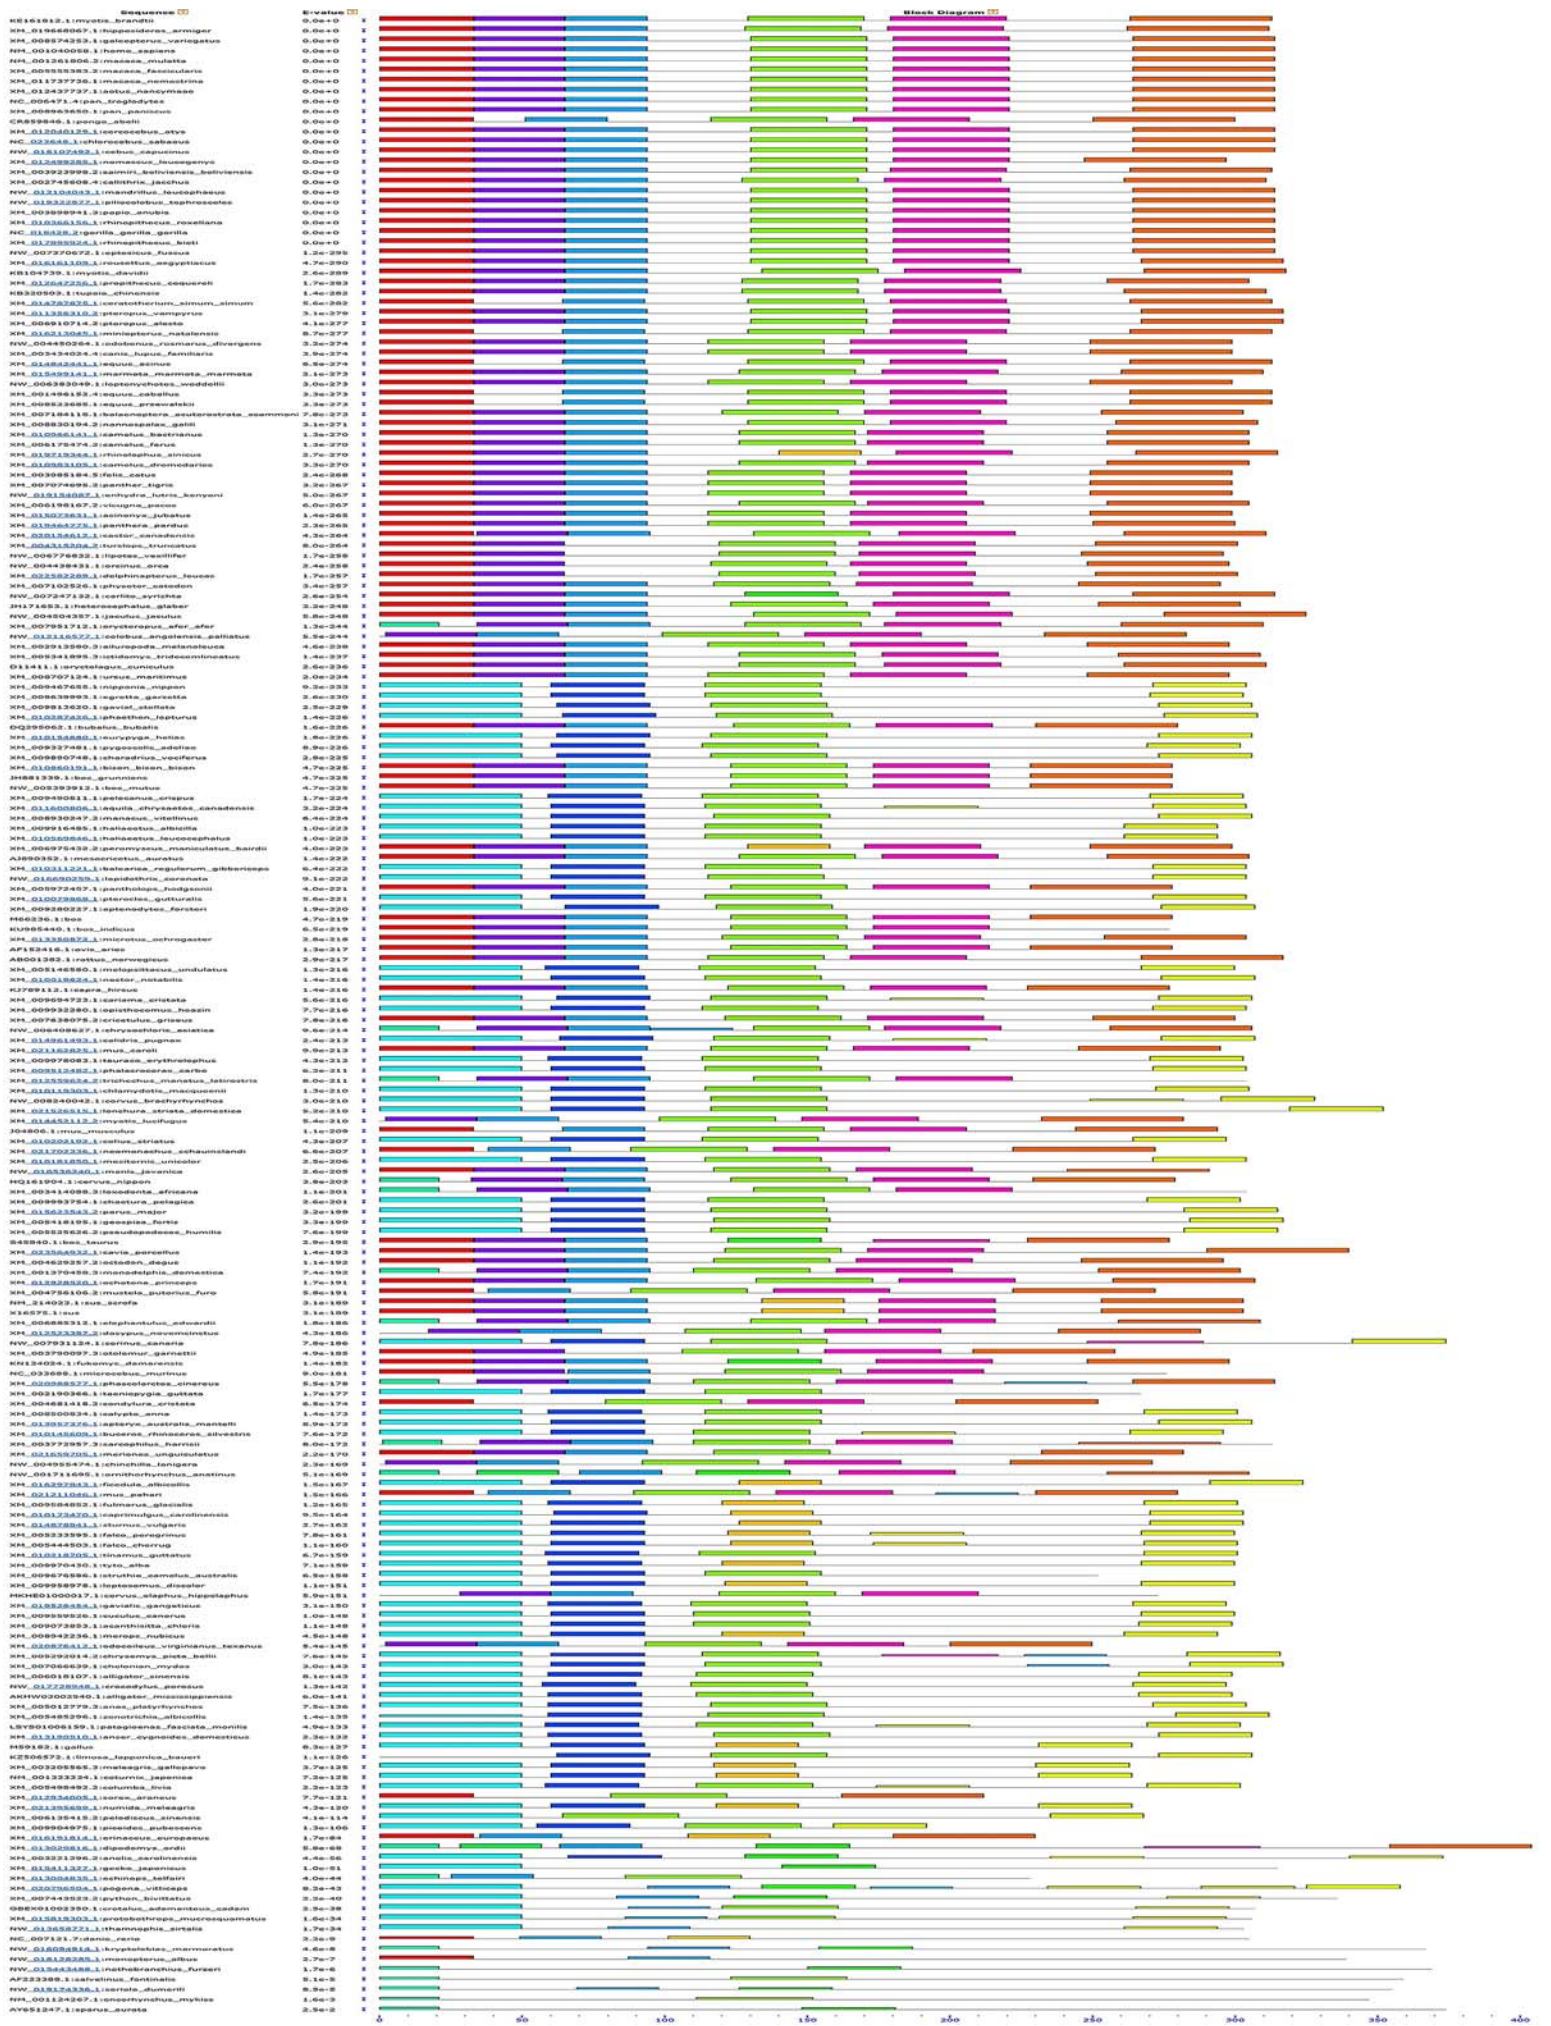

**Figure S2: Phylogenetic tree of the canonical osteopontin sequences.** The canonical sequences derived from Tables S1 and S2 were used for a taxonomic analysis. In positions with amino acid variation, either the most common allele or X served as placeholders. The tree was generated using the TreeTop option in GeneBee.

Cluster algorithm

# PHYLOGENETIC TREE

Phylogram

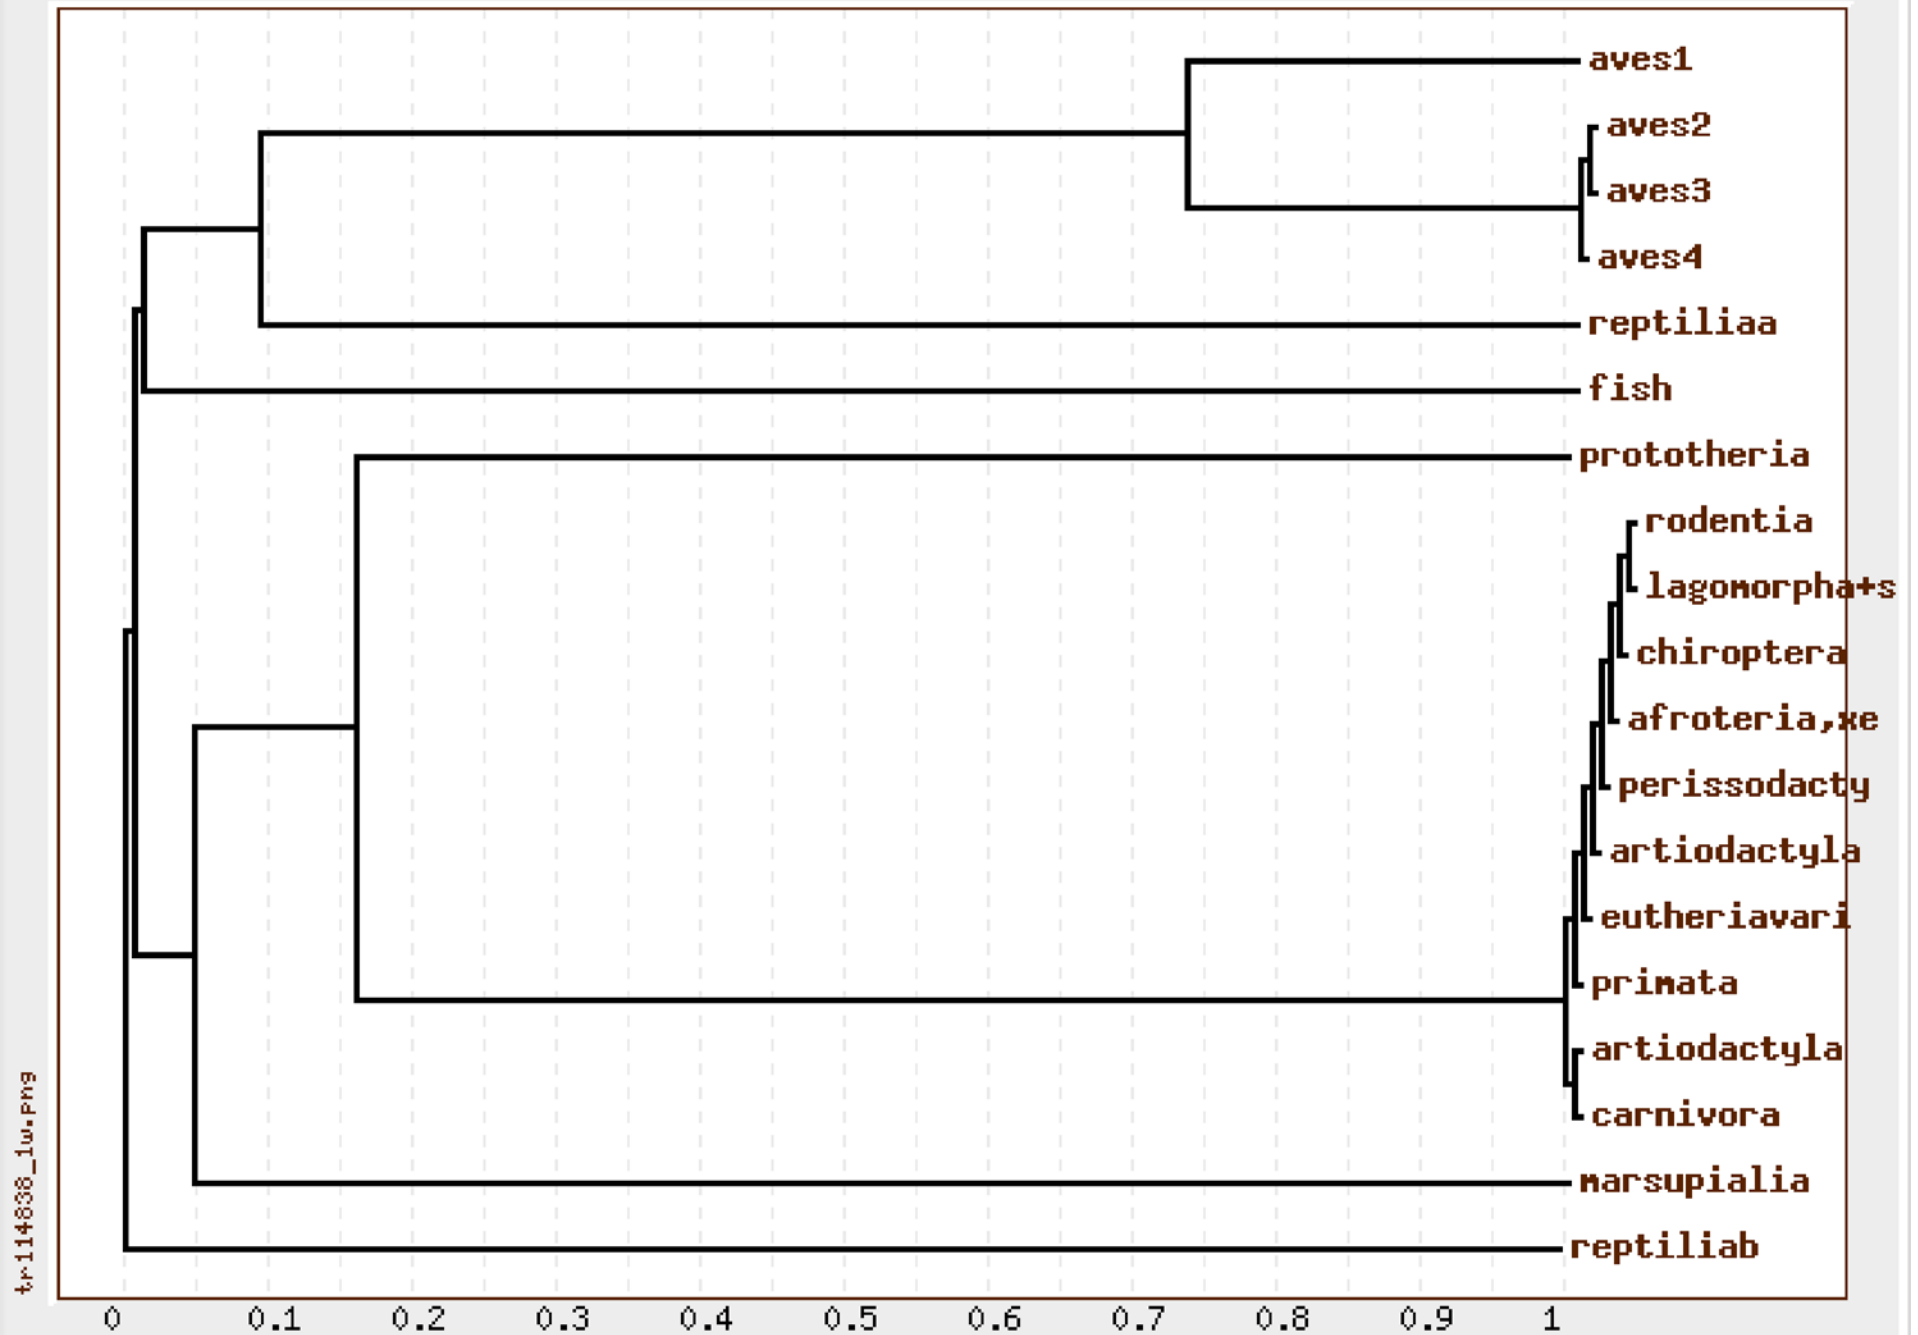

tr-114838\_1u.png

**Figure S3: The amino acid composition of osteopontin.** Shown are the amino acid compositions (as percent of total) for nine orders of animals. Each bar represents one species, all species available in each order were analyzed. There is little variation within each order, but notable differences among orders of animals. All osteopontins are rich in serine and low in tyrosine. The asparagine content is high (lowest, by comparison, in Marsupials). Squamata have a high histidine content due to the long insert between the SSEE motifs.

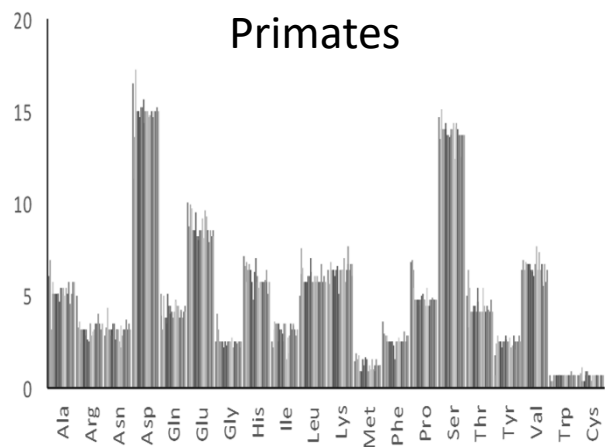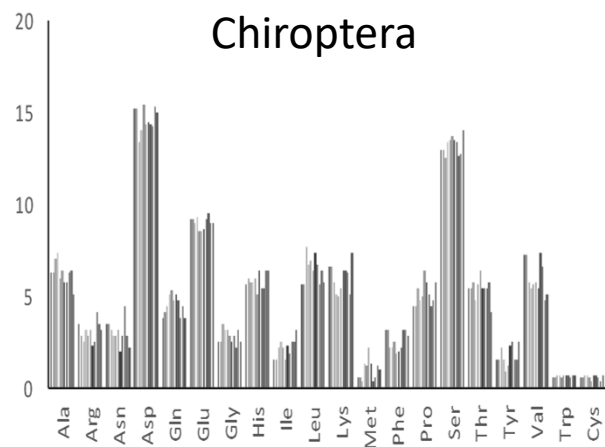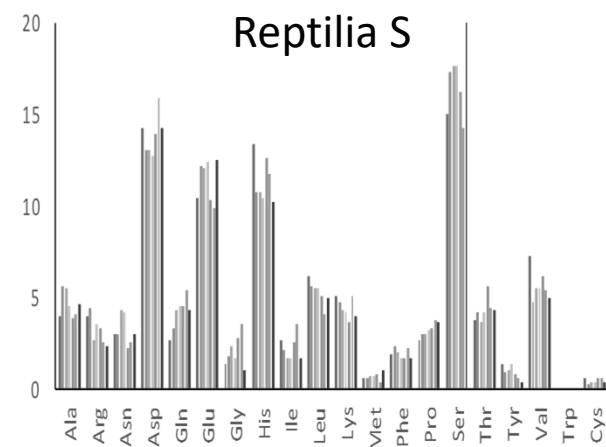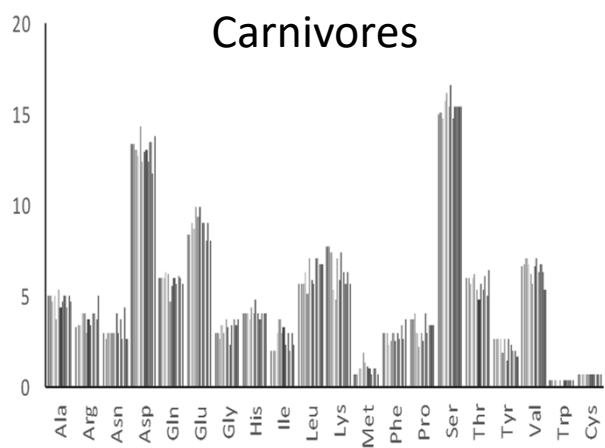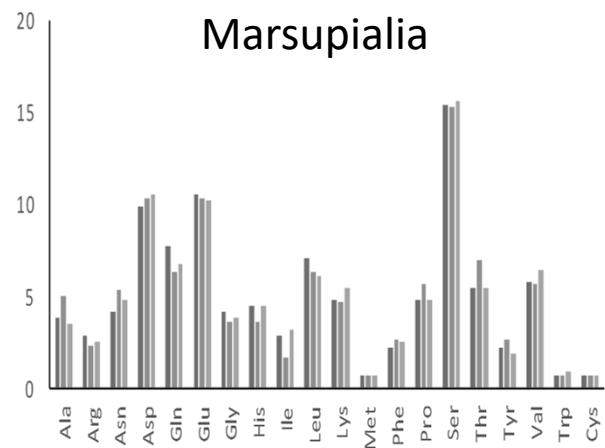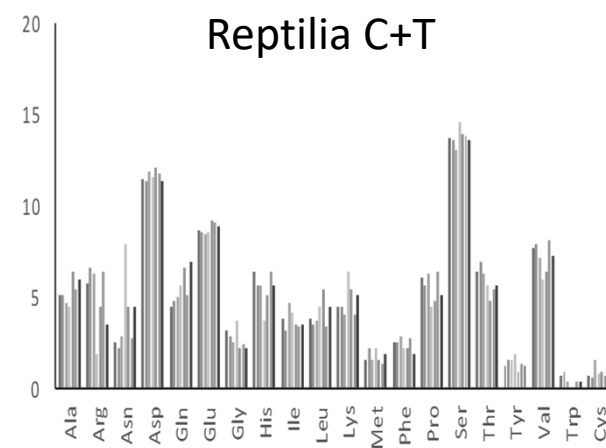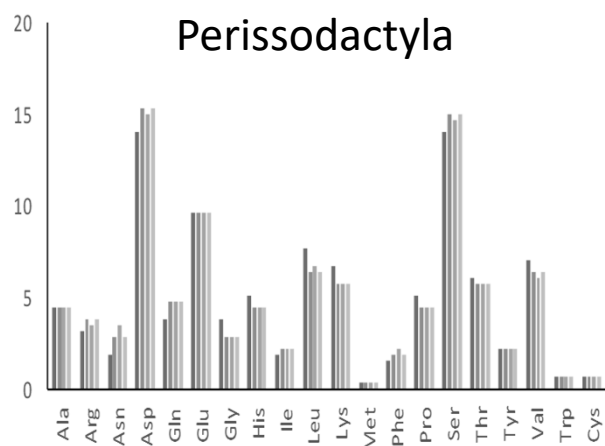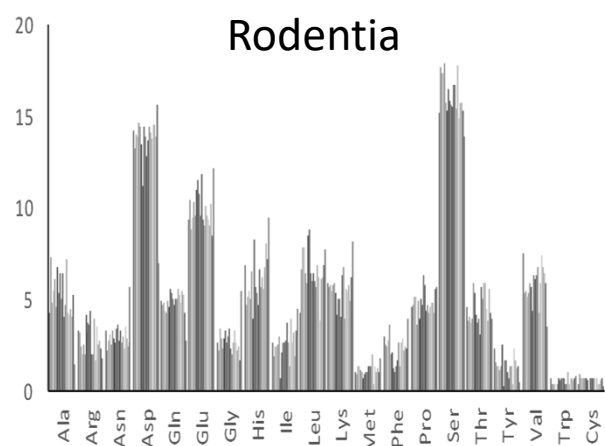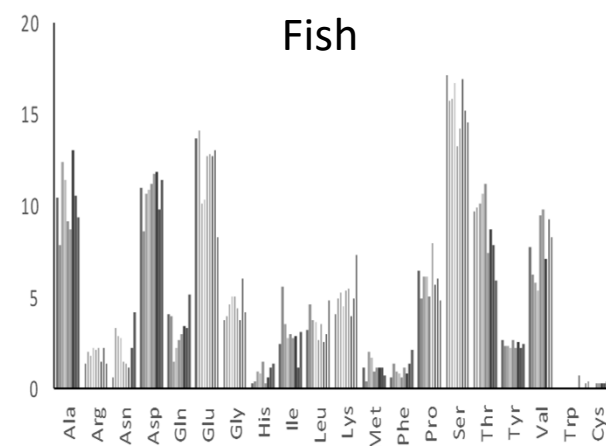

Supplement: ijms-19-02557-s001.pdf [file ijms-19-02557-s001.pdf]
